# Supplementary material for: Impact of carbapenem resistance on mortality in patients infected with Enterobacteriaceae: a systematic review and meta-analysis
Source: PubMed Central journal article supplement — BMJ Open. 2021 Dec 14;11(12):e054971. doi: 10.1136/bmjopen-2021-054971 (PMC8672018; doi:10.1136/bmjopen-2021-054971), 2021-12-14
Supplement: bmjopen-2021-054971.draft_revisions.pdf [file bmjopen-2021-054971.draft_revisions.pdf]

# BMJ Open

BMJ Open is committed to open peer review. As part of this commitment we make the peer review history of every article we publish publicly available.

When an article is published we post the peer reviewers' comments and the authors' responses online. We also post the versions of the paper that were used during peer review. These are the versions that the peer review comments apply to.

The versions of the paper that follow are the versions that were submitted during the peer review process. They are not the versions of record or the final published versions. They should not be cited or distributed as the published version of this manuscript.

BMJ Open is an open access journal and the full, final, typeset and author-corrected version of record of the manuscript is available on our site with no access controls, subscription charges or pay-per-view fees (<http://bmjopen.bmj.com>).

If you have any questions on BMJ Open's open peer review process please email [info.bmjopen@bmj.com](mailto:info.bmjopen@bmj.com)

# BMJ Open

## The impact of carbapenem resistance on mortality in patients infected with Enterobacteriaceae: a global systematic review and meta-analysis

|                               |                                                                                                                                                                                                                                                                                                                                                                                                                                                                                                                                                                                                                                                                                                                                                                 |
|-------------------------------|-----------------------------------------------------------------------------------------------------------------------------------------------------------------------------------------------------------------------------------------------------------------------------------------------------------------------------------------------------------------------------------------------------------------------------------------------------------------------------------------------------------------------------------------------------------------------------------------------------------------------------------------------------------------------------------------------------------------------------------------------------------------|
| Journal:                      | <i>BMJ Open</i>                                                                                                                                                                                                                                                                                                                                                                                                                                                                                                                                                                                                                                                                                                                                                 |
| Manuscript ID                 | bmjopen-2021-054971                                                                                                                                                                                                                                                                                                                                                                                                                                                                                                                                                                                                                                                                                                                                             |
| Article Type:                 | Original research                                                                                                                                                                                                                                                                                                                                                                                                                                                                                                                                                                                                                                                                                                                                               |
| Date Submitted by the Author: | 29-Jun-2021                                                                                                                                                                                                                                                                                                                                                                                                                                                                                                                                                                                                                                                                                                                                                     |
| Complete List of Authors:     | Zhou, Ruyin; China Agricultural University, College of Economics and Management<br>Fang, Xiangming; China Agricultural University; Georgia State University<br>Zhang, Jinjin; China Agricultural University<br>Zheng, Xiaodong; Zhejiang Gongshang University<br>Shangguan, Shuangyue; China Agricultural University<br>Chen, Shibo; China Agricultural University<br>Shen, Yingbo; Chinese Academy of Sciences<br>Liu, Zhihai; Qingdao Agricultural University<br>Li, Juan; National Institute for Communicable Disease Control and Prevention, China CDC<br>Zhang, Rong; Zhejiang University<br>Shen, Jianzhong<br>Walsh, Timothy R; University of Oxford, Department of Zoology<br>Wang, Yang; China Agricultural University, College of Veterinary Medicine |
| Keywords:                     | EPIDEMIOLOGY, Public health < INFECTIOUS DISEASES, HEALTH ECONOMICS                                                                                                                                                                                                                                                                                                                                                                                                                                                                                                                                                                                                                                                                                             |
|                               |                                                                                                                                                                                                                                                                                                                                                                                                                                                                                                                                                                                                                                                                                                                                                                 |

SCHOLARONE™  
Manuscripts

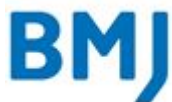

I, the Submitting Author has the right to grant and does grant on behalf of all authors of the Work (as defined in the below author licence), an exclusive licence and/or a non-exclusive licence for contributions from authors who are: i) UK Crown employees; ii) where BMJ has agreed a CC-BY licence shall apply, and/or iii) in accordance with the terms applicable for US Federal Government officers or employees acting as part of their official duties; on a worldwide, perpetual, irrevocable, royalty-free basis to BMJ Publishing Group Ltd ("BMJ") its licensees and where the relevant Journal is co-owned by BMJ to the co-owners of the Journal, to publish the Work in this journal and any other BMJ products and to exploit all rights, as set out in our [licence](#).

The Submitting Author accepts and understands that any supply made under these terms is made by BMJ to the Submitting Author unless you are acting as an employee on behalf of your employer or a postgraduate student of an affiliated institution which is paying any applicable article publishing charge ("APC") for Open Access articles. Where the Submitting Author wishes to make the Work available on an Open Access basis (and intends to pay the relevant APC), the terms of reuse of such Open Access shall be governed by a Creative Commons licence – details of these licences and which [Creative Commons](#) licence will apply to this Work are set out in our licence referred to above.

Other than as permitted in any relevant BMJ Author's Self Archiving Policies, I confirm this Work has not been accepted for publication elsewhere, is not being considered for publication elsewhere and does not duplicate material already published. I confirm all authors consent to publication of this Work and authorise the granting of this licence.

1  
2  
3  
4 **The impact of carbapenem resistance on mortality in patients infected with**  
5  
6 ***Enterobacteriaceae*: a global systematic review and meta-analysis**  
7  
8  
9

10  
11 **Ruyin Zhou<sup>1</sup>, Xiangming Fang<sup>1,2</sup>, Jinjin Zhang<sup>1</sup>, Xiaodong Zheng<sup>3</sup>, Shuangyue Shangguan<sup>1</sup>, Shibo**  
12  
13  
14 **Chen<sup>4</sup>, Yingbo Shen<sup>5</sup>, Zhihai Liu<sup>6</sup>, Juan Li<sup>7</sup>, Rong Zhang<sup>8</sup>, Jianzhong Shen<sup>9</sup>, Timothy R Walsh<sup>10</sup>,**  
15  
16  
17 **Yang Wang<sup>9</sup>**  
18  
19

20  
21 <sup>1</sup>College of Economics and Management, China Agricultural University, Beijing, China;

22 <sup>2</sup>School of Public Health, Georgia State University, Atlanta, USA;

23 <sup>3</sup>School of Economics, Zhejiang Gongshang University, Hangzhou, China;

24 <sup>4</sup>College of Veterinary Medicine, China Agricultural University, Beijing, China;

25 <sup>5</sup>CAS Key Laboratory of Pathogenic Microbiology and Immunology, Institute of Microbiology, Chinese  
26 Academy of Sciences, Beijing, China;

27 <sup>6</sup>College of Chemistry and Pharmaceutical Sciences, Qingdao Agricultural University, Qingdao, China;

28 <sup>7</sup>State Key Laboratory for Infectious Disease Prevention and Control, Collaborative Innovation Center for  
29 Diagnosis and Treatment of Infectious Disease, National Institute for Communicable Disease Control and  
30 Prevention, China CDC, Beijing, China;

31 <sup>8</sup>The Second Affiliated Hospital of Zhejiang University, Zhejiang University, Hangzhou, China;

32 <sup>9</sup>Beijing Key Laboratory of Detection Technology for Animal-Derived Food Safety, College of Veterinary  
33 Medicine, China Agricultural University, Beijing, China;

34 <sup>10</sup>Department of Zoology, University of Oxford, Oxford, UK.  
35  
36  
37  
38  
39

40 Corresponding author:

41 Xiangming Fang, PhD

42 College of Economics and Management

43 China Agricultural University

44 Address: No.17, Qinghuadong Road,

45 Haidian District, Beijing, 100083, China

46 E-mail address: xmfang@cau.edu.cn  
47  
48  
49  
50  
51  
52

53 Word count: 3956  
54  
55  
56  
57  
58  
59  
60

**ABSTRACT**

**Objective** To provide a comprehensive assessment of the impact of carbapenem resistance on mortality among patients infected with *Enterobacteriaceae* and explore the source of heterogeneity between studies.

**Methods** We conducted a systematic review and meta-analysis of all observational studies published between 1 January 1994 and 30 August 2020 which reported mortality outcomes of hospitalized patients infected with carbapenem-resistant *Enterobacteriaceae* (CRE) and carbapenem-susceptible *Enterobacteriaceae* (CSE). Stratified analysis and meta-regression were further performed to investigate the heterogeneity between studies.

**Results** Of 10304 identified studies, 50 studies were included. The results showed that carbapenem resistance has doubled the mortality rate of patients infected with CRE compared to patients infected with CSE (RR, 2.14, 95% CI, 1.85-2.48), and in absolute terms, CRE infection can increase the risk of mortality by 22% (RD, 0.22, 95%CI, 0.18-0.26). The results of the stratified analysis and meta-regression suggested the effect of carbapenem resistance on mortality varied by infection type, geographic region, sample size and year of publication.

**Conclusion** CRE infections were associated with a higher risk of death compared with CSE infection. The magnitude of the effect of carbapenem resistance on mortality may be influenced by infection type, geographic region, sample size and publication year. In further research, more studies need to be conducted in low-income countries and other regions to provide more evidence to draw resources to fight against CRE.

**Keywords:** *Enterobacteriaceae*; carbapenems; meta-analysis; mortality; resistance

## Article summary

### Strengths and limitations of this study

- This study provided a comprehensive meta-analysis to assess the impact of carbapenem resistance on mortality among patients infected with *Enterobacteriaceae*, including nearly 20 new published studies in recent three years that were not included in previous relevant reviews.
- This is the first review to explore the source of heterogeneity between studies through meta-regression analysis in consideration of country economic status and geographic region when assessing the association between carbapenem resistance and mortality among patients infected with *Enterobacteriaceae*.
- This review reported effect measures in both relative and absolute terms, providing a complete picture of the effect of carbapenem resistance on mortality among patients infected with *Enterobacteriaceae*.
- Publication bias may exist due to a lack of studies from low-income countries and other regions.

## INTRODUCTION

The *Enterobacteriaceae* species, mainly *Klebsiella pneumoniae* and *Escherichia coli*, can cause infections such as bloodstream infections, ventilator-associated pneumonia, intra-abdominal infections and urinary tract infections both in healthcare and community settings.<sup>1</sup> The treatment of these infections is becoming increasingly challenging because of the increasing prevalence of multi-drug-resistant *Enterobacteriaceae*, such as extended-spectrum  $\beta$ -lactamases (ESBLs)-producing *Enterobacteriaceae*. To counter this, carbapenems were introduced in the 1980s<sup>2</sup> and proved efficacious in the clinical treatment of infections caused by ESBLs-producing *Enterobacteriaceae*.<sup>3</sup> However, since the carbapenem-resistant *Enterobacteriaceae* (CRE) emerged in the early 1990s,<sup>4</sup> CRE has been increasingly reported worldwide.<sup>5,6</sup> The prevalence of CRE is mostly driven by the spread of carbapenemases, a group of  $\beta$ -lactamases hydrolyzing carbapenems.<sup>7</sup> The CRE strains producing diverse types of carbapenemases are endemic in different areas of the world.<sup>8</sup> Some countries have high overall rates of CRE, including Greece, Italy, Brazil, China, the United States, and Colombia.<sup>7</sup> For example, the rate of carbapenem resistance in *Klebsiella pneumoniae* isolates was as high as 63.9% in Greece in 2018.<sup>9</sup> The increasing prevalence of CRE has posed a serious threat to public health due to reduced efficacy of carbapenem and limited available therapy options, it was therefore categorized as the most critical group of multidrug-resistant pathogens with the highest urgency of the need for new antibiotics.<sup>10</sup>

The mortality of CRE infections is a research hotspot. Recently, some systematic reviews have conducted meta-analyses to assess the association between CRE infections and mortality by comparing with the mortality outcome of patients infected with carbapenem-susceptible *Enterobacteriaceae*(CSE),<sup>12-17</sup> and the results showed that CRE infections could lead to increased mortality. The latest systematic review on this topic included studies published until 2017.<sup>13</sup> However, nearly 20 relevant articles have

1  
2  
3  
4 been published since 2018. A timely and comprehensive summary of the results in published articles will  
5  
6 be helpful to understand the excess health burden attributable to carbapenem-resistant *Enterobacteriaceae*  
7  
8 (CRE) infections. Moreover, although previous systematic reviews have identified heterogeneity between  
9  
10 studies and discussed some confounding factors of mortality including patient-, infection-, organism-, and  
11  
12 therapy-related factors,<sup>13,14,16</sup> few of them examined whether the effect of carbapenem resistance on  
13  
14 mortality varies by these factors through a formal statistical approach or meta-regression analysis. Besides,  
15  
16 the differences in economic status and geographic region were not considered in previous reviews. The  
17  
18 development of antibiotic resistance resulted in decreasing effectiveness of first-line antibiotics, and more  
19  
20 expensive second and third-line antibiotic treatments need to be used, but these treatments may be not  
21  
22 obtained or afforded by patients in developing countries with a resistant infection,<sup>18</sup> which might result in  
23  
24 worse prognostic outcomes. The effect of carbapenem resistance on mortality may exist regional  
25  
26 differences because the CRE strains with different types of carbapenemases and virulence characteristics<sup>1</sup>  
27  
28 are predominant in different regions worldwide.<sup>8</sup> Two previous reviews have shown that the mortality rate  
29  
30 of patients with CRE infections differs by geographic region.<sup>11,15</sup> However, without data from control  
31  
32 groups, whether the impact of carbapenem resistance on mortality differs in the region is still unknown.

33  
34  
35 Therefore, we aim to provide a comprehensive systematic review of the impact of carbapenem  
36  
37 resistance on mortality among patients infected with *Enterobacteriaceae* and explore the source of  
38  
39 heterogeneity between studies in consideration of the differences in country income and geographic  
40  
41 regions to help policy-makers to develop strategies and policies to combat CRE worldwide.  
42  
43  
44  
45  
46  
47  
48  
49  
50  
51  
52  
53  
54  
55  
56  
57  
58  
59  
60



## METHODS

This systematic review is conducted following the guidelines of Cochrane Guidance<sup>19</sup> and the Preferred Reporting Items for Systematic Reviews and Meta-Analyses (PRISMA) (see Supplementary Material Appendix 1).<sup>20</sup> The protocol was registered with PROSPERO on July 5, 2020(CRD42020176808). The initial protocol was designed with a broad scope including many research contents, but in consideration of the limitation of maximum length, we decided to divide our work into two parts: the first (this study) focused on mortality, and the second will focus on morbidity and the economic outcomes.

### Search strategy

We conducted a systematic literature search on the databases of PubMed, Embase, Web of Science, and the Cochrane Library to select relevant studies published between 1 January 1994, and 30 August 2020 to identify eligible studies. This period was chosen because carbapenem-resistant *Enterobacteriaceae* were first reported in the 1990s. Specifically, the strains producing Metallo- $\beta$ -lactamase(MBL)IMP-1, which is a type of carbapenemase that can hydrolyze carbapenems, were first identified in Japan from a study published in 1994.<sup>4</sup>

The search strategy was designed by combining the terms of bacteria and carbapenem resistance (see Supplementary Material Appendix 2). The search terms for the bacteria include “*Enterobacteriaceae*” and also “*Klebsiella pneumoniae*” and “*Escherichia coli*”, which are the two most clinically important pathogens within the *Enterobacteriaceae* family, to ensure comprehensive identification of relevant studies. The search terms for carbapenem resistance include “carbapenem-resistant” or “carbapenem resistance” or “carbapenem non-susceptible” or “carbapenemase-producing” because CRE can be generally divided into carbapenemase-producing CRE (CP-CRE) and non-carbapenemase-producing CRE (non-CP-CRE).<sup>21</sup>

## Selection criteria

We included studies fulfilling the following criteria: (1) primary observational studies (i.e., case-control study, cohort studies); (2) published from 1 January 1994 to 30 August 2020; (3) published in English; (4) studies that assessed the mortality for hospitalized patients with confirmed infections due to CRE and the mortality of patients in control group infected with CSE.

Exclusion criteria were as follows: (1) studies that designed patients colonized with CRE or with unconfirmed CRE infection as exposed groups; (2) studies that mainly focused on the resistance of other antibiotics instead of carbapenem antibiotics; (3) studies without a control group, or with a control group not infected with *Enterobacteriaceae* pathogens; (4) studies including less than 10 patients in case or control group; (5) studies on animals; (6) publications such as editorials and letters. The list of excluded studies with reasons for exclusion is provided in Supplementary Material Appendix 3.

Two reviewers independently screened all titles and abstracts of identified studies and then reviewed the full text of studies satisfying the inclusion criteria. Disagreements were resolved through consensus or discussion with a third senior reviewer.

## Data extraction

Data were extracted from each selected study into a data extraction form in Excel. The extracted data include first author, year of publication, study period, country, region, country income level classified by the World Bank,<sup>22</sup> study design, infection type, specific pathogen, sample size, number of deaths in CRE and CSE groups. Notably, we will choose the income status of the country based on the period when the study was conducted because the income status of some countries may have changed between 1994 and 2020. For example, there are 15 studies conducted in China from 2006 to 2018 in this meta-analysis, but

1  
2  
3  
4 the income status of China changed from lower-income level to upper-income level since 2010. Therefore,  
5  
6 two studies conducted between 2006 and 2009 were classified as lower middle income, and the other 13  
7  
8 studies conducted after 2010 were classified as upper middle income. All kinds of measurements of  
9  
10 mortality outcomes in each included study were extracted including all-cause in-hospital mortality,  
11  
12 all-cause mortality at 6-30 days (6 days, 7 days, 14 days, 21 days, 28 days, 30 days) after diagnosis,  
13  
14 mortality in ICU, and mortality attributable to infection (usually defined as the death of a patient with  
15  
16 clinical and laboratory evidence of ongoing infection in absence of other feasible reasons). If mortality  
17  
18 outcomes at multiple time points were reported in one study, only one mortality outcome will be analyzed  
19  
20 in the subsequent calculation of the pooled overall mortality, with a priority of in-hospital mortality and the  
21  
22 latest time point of mortality.  
23  
24  
25  
26  
27  
28

29  
30 Data extraction was conducted by two reviewers independently and disagreements were resolved  
31  
32 through consensus or discussion with a third senior reviewer.  
33  
34  
35  
36  
37

### 38 **Data synthesis and analysis**

39  
40 We calculated the pooled relative risk (RR) and risk difference (RD) by comparing the mortality in  
41  
42 patients with CRE infection with that in patients with CSE infection. The reason that we choose RR as the  
43  
44 measure of relative risk rather than OR is that the latter was more difficult to interpret compared to RR<sup>23,24</sup>  
45  
46 and usually misinterpreted as a RR which may overestimate the intervention effect when it is more than  
47  
48 1.<sup>25</sup> Besides, we also calculated RD to describe the absolute difference in the risk of mortality between the  
49  
50 two groups because of the drawback of sole reporting the relative risk that it may conceal the underlying  
51  
52 absolute risks and readers tend to overestimate the effect.<sup>26</sup> It was recommended that both relative risk and  
53  
54 absolute risk should be reported to provide a complete picture of the effect.<sup>27</sup> The pooled estimates of RRs  
55  
56  
57  
58  
59  
60

1  
2  
3  
4 and RDs with 95% confidence intervals were calculated using a random-effects model using the method of  
5  
6 DerSimonian & Laird,<sup>28</sup> with the estimate of heterogeneity being taken from the Mantel-Haenszel model.

7  
8  
9 An RR of 1 and RD of 0 indicate that the risk of mortality is identical regardless of carbapenem resistance.

10  
11 The heterogeneity across studies was assessed by Q-statistic and I<sup>2</sup> measures. The heterogeneity was  
12  
13 considered statistically significant when I<sup>2</sup> values >50%. To identify the potential sources of heterogeneity,  
14  
15 we conducted stratified analysis by bacterial species, different mortality endpoints, geographic region,  
16  
17 economic status, source of infection, sample size, and resistance mechanism. F-test based on a one-way  
18  
19 analysis of variance (ANOVA) was used to test the differences in the mean effect estimates between  
20  
21 subgroups. We also conducted random-effects meta-regression based on restricted maximum likelihood  
22  
23 using an iterative procedure to examine whether the effect estimates differ significantly by the above  
24  
25 variables, and *P* <0.05 was considered statistically significant. A sensitivity analysis was also conducted,  
26  
27 in which the pooled RRs were recalculated using random-effects meta-analysis after removing one study at  
28  
29 a time to evaluate the stability of the results. Finally, we conducted a funnel plot to assess the publication  
30  
31 bias. All the statistical analyses were conducted using the Stata version 15 software.  
32  
33  
34  
35  
36  
37  
38  
39  
40  
41  
42

#### 43 **Risk of bias assessment**

44  
45  
46 Two reviewers independently assessed the risk of bias of each included study using the Newcastle-Ottawa  
47  
48 quality assessment Scale (NOS) for observational studies,<sup>29</sup> and disagreements were resolved through  
49  
50 consensus or discussion with a third senior reviewer.  
51  
52  
53

#### 54 **Patient and public involvement**

55  
56  
57 Patients and the public were not involved in the design, or conduct, or reporting, or dissemination plans of  
58  
59  
60

1  
2  
3  
4 this systematic review.  
5  
6  
7  
8

## 9 RESULTS

10 We identified 10304 studies from the literature search, and 50 studies<sup>30-79</sup> were selected according to the  
11 inclusion and included in the final review (Figure.1). The characteristics of the included studies are  
12 provided in Table.1. The studies are conducted in 14 countries from four regions. Nearly half of the studies  
13 are conducted in Asia (n=24), followed by the region of America (n=15), Europe (n=9), and only one study  
14 was conducted in Africa. We also included a multi-region study including data from Asia, Africa and  
15 America.<sup>79</sup> The studies included are mainly conducted in high-income countries (n=27) and  
16 upper-middle-income countries (n=19), only three studies were conducted in lower-middle-income  
17 countries and no study in low-income countries was found that met the criteria. Most studies (n=39)  
18 reported mortality outcomes of infections due to *Klebsiella pneumoniae* pathogens, and two studies  
19 reported mortality outcomes of infections due to *Escherichia coli* and nine studies reported mortality  
20 outcomes of infections due to mixed *Enterobacteriaceae* pathogens. Half of the studies (n=24) evaluated  
21 infected patients regardless of specific infection type. Among the rest studies focused on specific sites of  
22 infection, bloodstream infection was the most frequent type (n=21), followed by urinary tract infection  
23 (n=3), and one study for neurosurgical infection and one for pneumonia. Among the 50 studies included,  
24 most were cohort studies(n=29). In the other 21 case-control studies, the mortality outcomes were  
25 measured using a cohort study design, therefore those studies were assessed as cohort studies in our quality  
26 appraisal. The NOS assessment for the risk of bias of all included studies was summarized in  
27 Supplementary Material Appendix 4. According to the NOS scores, 46 were categorized as low risk of bias  
28 (7 to 9) and only 4 studies were categorized as the moderate risk of bias (4 to 6).  
29  
30  
31  
32  
33  
34  
35  
36  
37  
38  
39  
40  
41  
42  
43  
44  
45  
46  
47  
48  
49  
50  
51  
52  
53  
54  
55  
56  
57  
58  
59  
60

Table.1 Characteristic of included studies

| First Author             | Year | study period    | Country | Region  | Economic status     | Study design               | Infection type          | Pathogen                   | Sample size (n)       |      | Mortality measurements              | Mortality (%) |        |
|--------------------------|------|-----------------|---------|---------|---------------------|----------------------------|-------------------------|----------------------------|-----------------------|------|-------------------------------------|---------------|--------|
|                          |      |                 |         |         |                     |                            |                         |                            | CRE                   | CSE  |                                     | CRE           | CSE    |
|                          |      |                 |         |         |                     |                            |                         |                            | Alicino <sup>30</sup> | 2015 | 2007.01-2014.12                     | Italy         | Europe |
| Balkhair <sup>31</sup>   | 2019 | 2007.01-2016.12 | Oman    | Asia    | High income         | retrospective cohort study | bloodstream infection   | Klebsiella pneumoniae      | 69                    | 305  | 30d mortality                       | 63.8          | 24.3   |
| Ben-David <sup>32</sup>  | 2012 | 2006.01-2006.12 | Israel  | Asia    | High income         | retrospective cohort study | bloodstream infection   | Klebsiella pneumoniae(KPC) | 42                    | 85   | inhospital mortality                | 69            | 24     |
|                          |      |                 |         |         |                     |                            |                         |                            |                       |      | mortality attributable to infection | 48            | 17     |
| Brizendine <sup>33</sup> | 2015 | 2006-2012       | USA     | America | High income         | retrospective cohort study | urinary tract infection | Klebsiella pneumoniae      | 22                    | 64   | inhospital mortality                | 18            | 2      |
|                          |      |                 |         |         |                     |                            |                         |                            |                       |      | 28d mortality                       | 50            | 14.6   |
| Chang <sup>34</sup>      | 2019 | 2014.01-2018.07 | China   | Asia    | Upper middle income | retrospective cohort study | bloodstream infection   | Klebsiella pneumoniae      | 46                    | 239  | 7d mortality                        | 37            | 10.5   |
|                          |      |                 |         |         |                     |                            |                         |                            |                       |      | inhospital mortality                | 58.7          | 15.9   |
|                          |      |                 |         |         |                     |                            |                         |                            |                       |      | inhospital mortality                | 94.12         | 50     |
| Chang <sup>35</sup>      | 2011 | 2006.1-2008.12  | China   | Asia    | Lower middle income | retrospective case control | bloodstream infection   | Escherichia. coli          | 17                    | 34   | 28d hospital mortality              | 70.59         | 47.06  |
|                          |      |                 |         |         |                     |                            |                         |                            |                       |      | 14d hospital mortality              | 47.06         | 38.24  |
| Chiotos <sup>36</sup>    | 2018 | 2011.1-2016.7   | USA     | America | High income         | retrospective cohort study | mixed                   | Mixed Enterobacteriaceae   | 31                    | 144  | 30d mortality                       | 6.5           | 1.4    |

|                                 |      |                                |                 |         |                           |                                        |                          |                               |     |      |                               |          |         |
|---------------------------------|------|--------------------------------|-----------------|---------|---------------------------|----------------------------------------|--------------------------|-------------------------------|-----|------|-------------------------------|----------|---------|
| Cienfuegos-Gallet <sup>37</sup> | 2019 | 2014.02-03;<br>2014.10-2015.09 | Colombia        | America | Upper<br>middle<br>income | prospective<br>cohort study            | mixed                    | Klebsiella<br>pneumoniae(KPC) | 49  | 289  | 30d mortality                 | 32.65    | 15.92   |
| Correa <sup>38</sup>            | 2013 | 2006.1-2008.8                  | Brazil          | America | Upper<br>middle<br>income | retrospective<br>case control          | mixed                    | Klebsiella pneumoniae         | 20  | 40   | inhospital<br>mortality       | 50       | 27.5    |
| Cubero <sup>39</sup>            | 2015 | 2010.10-2012.12                | Spain           | Europe  | High<br>income            | retrospective<br>case control          | mixed                    | Klebsiella<br>pneumoniae(OXA) | 20  | 9    | inhospital<br>mortality       | 35       | 11.1    |
| Daikos <sup>40</sup>            | 2009 | 2004.2-2006.3                  | Greece          | Europe  | High<br>income            | prospective<br>cohort study            | bloodstream<br>infection | Klebsiella<br>pneumoniae(VIM) | 14  | 148  | 14d mortality                 | 42.9     | 16.9    |
| Fraenkel-Wandel <sup>41</sup>   | 2016 | 2006-2012                      | Israel          | Asia    | High<br>income            | retrospective<br>case control          | bloodstream<br>infection | Klebsiella<br>pneumoniae(KPC) | 68  | 136  | inhospital<br>mortality       | 65       | 40      |
| Gallagher <sup>42</sup>         | 2014 | 2005.6-2010.10                 | USA             | America | High<br>income            | retrospective<br>case control          | bloodstream<br>infection | Klebsiella pneumoniae         | 43  | 111  | inhospital<br>mortality       | 45       | 32      |
| Garbati <sup>43</sup>           | 2016 | 2012.3-2013.12                 | Saudi<br>Arabia | Asia    | High<br>income            | prospective case<br>control study      | mixed                    | Mixed<br>Enterobacteriaceae   | 29  | 58   | inhospital<br>mortality       | 31       | 12.1    |
| Gomez Rueda <sup>44</sup>       | 2014 | 2008.1-2011.1                  | Colombia        | America | Upper<br>middle<br>income | prospective case<br>control study      | mixed                    | Klebsiella pneumoniae         | 61  | 61   | inhospital<br>mortality       | 50.8     | 32.7    |
| Hoxha <sup>45</sup>             | 2016 | 2012.11-2013.7                 | Italy           | Europe  | High<br>income            | prospective<br>cohort study            | mixed                    | Klebsiella pneumoniae         | 49  | 49   | 30d mortality<br>6d mortality | 61<br>24 | 20<br>8 |
| Huang <sup>46</sup>             | 2018 | 2017.01-2017.12                | China           | Asia    | Upper<br>middle<br>income | retrospective<br>cohort study          | mixed                    | Klebsiella pneumoniae         | 267 | 1328 | inhospital<br>mortality       | 14.61    | 5.65    |
| Hussein <sup>47</sup>           | 2013 | 2006.1-2008.12                 | Israel          | Asia    | High<br>income            | retrospective<br>case control<br>study | bloodstream<br>infection | Klebsiella pneumoniae         | 103 | 214  | 30d mortality                 | 43.7     | 29      |

|                          |      |                |        |         |                     |                                  |                       |                            |     |     |                      |      |      |
|--------------------------|------|----------------|--------|---------|---------------------|----------------------------------|-----------------------|----------------------------|-----|-----|----------------------|------|------|
| Kotb <sup>48</sup>       | 2020 | 2011-2017      | Egypt  | Africa  | Lower middle income | retrospective cohort study       | mixed                 | Mixed Enterobacteriaceae   | 871 | 727 | mortality in ICU     | 61.1 | 51.7 |
| Lee <sup>49</sup>        | 2016 | 2013.1-2014.2  | Korea  | Asia    | High income         | retrospective case control study | mixed                 | Mixed Enterobacteriaceae   | 37  | 37  | inhospital mortality | 10.8 | 10.8 |
|                          |      |                |        |         |                     |                                  |                       |                            |     |     | 28d mortality        | 27   | 21.6 |
| Li <sup>50</sup>         | 2019 | 2014.1-2018.6  | China  | Asia    | Upper middle income | retrospective case control study | mixed                 | Klebsiella pneumoniae      | 244 | 263 | 30d mortality in ICU | 28.9 | 11   |
| Liu <sup>51</sup>        | 2019 | 2014.1-2018.9  | China  | Asia    | Upper middle income | retrospective cohort study       | bloodstream infection | Klebsiella pneumoniae      | 20  | 69  | 30d mortality        | 55   | 15.9 |
| Liu <sup>52</sup>        | 2012 | 2007.1-2009.12 | China  | Asia    | Lower middle incom  | retrospective case control study | bloodstream infection | Klebsiella pneumoniae      | 25  | 50  | inhospital mortality | 60   | 40   |
|                          |      |                |        |         |                     |                                  |                       |                            |     |     | 28d mortality        | 52   | 30   |
|                          |      |                |        |         |                     |                                  |                       |                            |     |     | 14d mortality        | 44   | 22   |
| Mclaughlin <sup>53</sup> | 2014 | 2010.3-2011.12 | USA    | America | High income         | retrospective case control study | bloodstream infection | Klebsiella pneumoniae(KPC) | 15  | 60  | inhospital mortality | 33.3 | 11.7 |
| Meng <sup>54</sup>       | 2017 | 2012.1-2015.12 | China  | Asia    | Upper middle income | retrospective case control study | mixed                 | Escherichia. coli          | 49  | 96  | inhospital mortality | 12   | 1    |
| Mouloudi <sup>55</sup>   | 2010 | 2007.1-2008.12 | Greece | Europe  | High income         | retrospective case control study | bloodstream infection | Klebsiella pneumoniae(KPC) | 37  | 22  | inhospital mortality | 67.8 | 41   |
|                          |      |                |        |         |                     |                                  |                       |                            |     |     | mortality in ICU     | 27   | 14   |
| Ny <sup>56</sup>         | 2015 | 2011.1-2013.12 | USA    | America | High                | retrospective                    | mixed                 | Klebsiella pneumoniae      | 48  | 48  | inhospital           | 14.6 | 10.4 |



|                              |      |                |        |         |                     |                                  |                         |                            |     |     |                           |           |       |  |
|------------------------------|------|----------------|--------|---------|---------------------|----------------------------------|-------------------------|----------------------------|-----|-----|---------------------------|-----------|-------|--|
|                              |      |                |        |         | income              | cohort study                     |                         |                            |     |     |                           | mortality |       |  |
| Orsi <sup>57</sup>           | 2013 | 2008.7-2011.6  | Italy  | Europe  | High income         | retrospective case control study | mixed                   | Klebsiella pneumoniae(KPC) | 36  | 43  | inhospital mortality      | 38.9      | 27.9  |  |
| Pan <sup>58</sup>            | 2019 | 2014           | China  | Asia    | Upper middle income | retrospective case control study | mixed                   | Klebsiella pneumoniae(KPC) | 66  | 132 | inhospital mortality      | 57.6      | 18.2  |  |
|                              |      |                |        |         |                     |                                  |                         |                            |     |     | 28d mortality             | 18.18     | 11.36 |  |
| Patel <sup>59</sup>          | 2008 | 2004.7-2006.6  | USA    | America | High income         | retrospective case control       | mixed                   | Klebsiella pneumoniae      | 99  | 99  | inhospital mortality      | 48        | 20    |  |
|                              |      |                |        |         |                     |                                  |                         |                            |     |     | attributable to infection | 38        | 12    |  |
| Pereira <sup>60</sup>        | 2015 | 2010.1-2013.1  | USA    | America | High income         | retrospective cohort study       | mixed                   | Klebsiella pneumoniae      | 20  | 36  | inhospital mortality      | 45        | 28    |  |
| Pouch <sup>61</sup>          | 2015 | 2007.1-2010.12 | USA    | America | High income         | retrospective case control study | urinary tract infection | Mixed Enterobacteriaceae   | 20  | 80  | inhospital mortality      | 30        | 10    |  |
| Qureshi <sup>62</sup>        | 2012 | 2011.1-2014.12 | USA    | America | High income         | retrospective case control       | bloodstream infection   | Klebsiella pneumoniae      | 19  | 51  | 28d mortality             | 47.4      | 27.5  |  |
| Sánchez-Romero <sup>63</sup> | 2011 | 2009.1-2009.12 | Spain  | Europe  | High income         | retrospective case control       | mixed                   | Klebsiella pneumoniae(VIM) | 28  | 55  | 14d mortality             | 46.4      | 30.9  |  |
| Schwaber <sup>64</sup>       | 2008 | 2003.9-2006.12 | Israel | Asia    | High income         | retrospective cohort study       | mixed                   | Klebsiella pneumoniae      | 48  | 56  | inhospital mortality      | 44        | 12.5  |  |
| Shilo <sup>65</sup>          | 2013 | 2006.1-2009.12 | Israel | Asia    | High income         | retrospective case control study | urinary tract infection | Klebsiella pneumoniae      | 135 | 127 | inhospital mortality      | 29        | 25    |  |

|    |                               |      |                |        |         |                     |                                  |                       |                               |     |     |                                     |      |      |  |
|----|-------------------------------|------|----------------|--------|---------|---------------------|----------------------------------|-----------------------|-------------------------------|-----|-----|-------------------------------------|------|------|--|
| 1  |                               |      |                |        |         |                     |                                  |                       |                               |     |     |                                     |      |      |  |
| 2  |                               |      |                |        |         |                     |                                  |                       |                               |     |     |                                     |      |      |  |
| 3  |                               |      |                |        |         |                     |                                  |                       |                               |     |     |                                     |      |      |  |
| 4  |                               |      |                |        |         |                     | retrospective                    |                       |                               |     |     |                                     |      |      |  |
| 5  | Simkins <sup>66</sup>         | 2014 | 2006.1-2010.12 | USA    | America | High income         | case control study               | mixed                 | Klebsiella pneumoniae         | 13  | 39  | inhospital mortality                | 46   | 8    |  |
| 6  |                               |      |                |        |         |                     |                                  |                       |                               |     |     |                                     |      |      |  |
| 7  |                               |      |                |        |         |                     |                                  |                       |                               |     |     |                                     |      |      |  |
| 8  |                               |      |                |        |         |                     |                                  |                       |                               |     |     | inhospital mortality                | 42.4 | 19.8 |  |
| 9  |                               |      |                |        |         |                     |                                  |                       |                               |     |     |                                     |      |      |  |
| 10 |                               |      |                |        |         | Upper middle income | retrospective cohort study       | bloodstream infection | Klebsiella pneumoniae         | 33  | 81  | mortality attributable to infection | 42.4 | 24.6 |  |
| 11 | Tian <sup>67</sup>            | 2016 | 2011.1-2015.12 | China  | Asia    |                     |                                  |                       |                               |     |     |                                     |      |      |  |
| 12 |                               |      |                |        |         |                     |                                  |                       |                               |     |     |                                     |      |      |  |
| 13 |                               |      |                |        |         |                     |                                  |                       |                               |     |     |                                     |      |      |  |
| 14 |                               |      |                |        |         |                     |                                  |                       |                               |     |     | 28d mortality                       | 33.3 | 18.5 |  |
| 15 |                               |      |                |        |         |                     |                                  |                       |                               |     |     |                                     |      |      |  |
| 16 |                               |      |                |        |         | Upper middle income | retrospective case control study | mixed                 | Mixed Enterobacteriaceae(OXA) | 27  | 108 | mortality attributable to infection | 11.1 | 7.4  |  |
| 17 | Torres-Gonzalez <sup>68</sup> | 2016 | 2013.11-2015.7 | Mexico | America |                     |                                  |                       |                               |     |     |                                     |      |      |  |
| 18 |                               |      |                |        |         |                     |                                  |                       |                               |     |     |                                     |      |      |  |
| 19 |                               |      |                |        |         | High income         | prospective cohort study         | bloodstream infection | Klebsiella pneumoniae         | 161 | 117 | 21d mortality                       | 52.2 | 14.5 |  |
| 20 | Treccarichi <sup>69</sup>     | 2016 | 2010.1-2014.6  | Italy  | Europe  |                     |                                  |                       |                               |     |     |                                     |      |      |  |
| 21 |                               |      |                |        |         |                     |                                  |                       |                               |     |     |                                     |      |      |  |
| 22 |                               |      |                |        |         | Upper middle income | retrospective cohort study       | mixed                 | Klebsiella pneumoniae         | 47  | 51  | mortality in ICU                    | 44.7 | 51   |  |
| 23 | Ulu <sup>70</sup>             | 2015 | 2012.1-2012.12 | Turkey | Asia    |                     |                                  |                       |                               |     |     |                                     |      |      |  |
| 24 |                               |      |                |        |         |                     |                                  |                       |                               |     |     |                                     |      |      |  |
| 25 |                               |      |                |        |         | High income         | retrospective cohort study       | mixed                 | Klebsiella pneumoniae         | 80  | 24  | mortality in ICU                    | 72.5 | 58.3 |  |
| 26 | Vardakas <sup>71</sup>        | 2015 | 2006.1-2009.10 | Greece | Europe  |                     |                                  |                       |                               |     |     |                                     |      |      |  |
| 27 |                               |      |                |        |         | Upper middle income | retrospective case control study | mixed                 | Klebsiella pneumoniae         | 48  | 48  | inhospital mortality                | 47.9 | 4.2  |  |
| 28 | Wang <sup>72</sup>            | 2018 | 2010.1-2014.12 | China  | Asia    |                     |                                  |                       |                               |     |     |                                     |      |      |  |
| 29 |                               |      |                |        |         |                     |                                  |                       |                               |     |     |                                     |      |      |  |
| 30 |                               |      |                |        |         | Upper middle income | retrospective cohort study       | bloodstream infection | Klebsiella pneumoniae         | 135 | 293 | 30d mortality                       | 58.5 | 15.4 |  |
| 31 | Xiao <sup>73</sup>            | 2018 | 2013.1-2015.12 | China  | Asia    |                     |                                  |                       |                               |     |     |                                     |      |      |  |
| 32 |                               |      |                |        |         |                     |                                  |                       |                               |     |     |                                     |      |      |  |
| 33 |                               |      |                |        |         | Upper middle income | retrospective case control study | bloodstream infection | Klebsiella pneumoniae         | 54  | 84  | inhospital mortality                | 18.5 | 8.3  |  |
| 34 | Zhang <sup>74</sup>           | 2018 | 2011.1-2014.12 | China  | Asia    |                     |                                  |                       |                               |     |     |                                     |      |      |  |
| 35 |                               |      |                |        |         |                     |                                  |                       |                               |     |     |                                     |      |      |  |
| 36 |                               |      |                |        |         |                     |                                  |                       |                               |     |     |                                     |      |      |  |
| 37 |                               |      |                |        |         |                     |                                  |                       |                               |     |     |                                     |      |      |  |
| 38 |                               |      |                |        |         |                     |                                  |                       |                               |     |     |                                     |      |      |  |
| 39 |                               |      |                |        |         |                     |                                  |                       |                               |     |     |                                     |      |      |  |
| 40 |                               |      |                |        |         |                     |                                  |                       |                               |     |     |                                     |      |      |  |
| 41 |                               |      |                |        |         |                     |                                  |                       |                               |     |     |                                     |      |      |  |
| 42 |                               |      |                |        |         |                     |                                  |                       |                               |     |     |                                     |      |      |  |
| 43 |                               |      |                |        |         |                     |                                  |                       |                               |     |     |                                     |      |      |  |
| 44 |                               |      |                |        |         |                     |                                  |                       |                               |     |     |                                     |      |      |  |
| 45 |                               |      |                |        |         |                     |                                  |                       |                               |     |     |                                     |      |      |  |
| 46 |                               |      |                |        |         |                     |                                  |                       |                               |     |     |                                     |      |      |  |

|                          |      |                |                              |                       |                                 |                            |                         |                          |     |     |                                                 |               |      |     |
|--------------------------|------|----------------|------------------------------|-----------------------|---------------------------------|----------------------------|-------------------------|--------------------------|-----|-----|-------------------------------------------------|---------------|------|-----|
|                          |      |                |                              |                       |                                 | income                     | study                   |                          |     |     |                                                 | 7d mortality  | 16.7 | 1.2 |
|                          |      |                |                              |                       |                                 |                            |                         |                          |     |     |                                                 | 28d mortality | 18.5 | 2.4 |
| Zheng <sup>75</sup>      | 2018 | 2014.1-2016.12 | China                        | Asia                  | Upper middle income             | retrospective cohort study | bloodstream infection   | Klebsiella pneumoniae    | 59  | 230 | 28d mortality                                   | 54.2          | 19.6 |     |
| Zheng <sup>76</sup>      | 2020 | 2012-2017      | China                        | Asia                  | Upper middle income             | retrospective cohort study | neurosurgical infection | Mixed Enterobacteriaceae | 26  | 107 | mortality attributable to infection             | 69.2          | 12.1 |     |
| Zuo <sup>77</sup>        | 2020 | 2015-2017      | China                        | Asia                  | Upper middle income             | retrospective case control | pneumonia               | Klebsiella pneumoniae    | 74  | 74  | in-hospital mortality attributable to infection | 35.1          | 20.3 |     |
| Villegas <sup>78</sup>   | 2016 | 2013.7-2014.11 | 7 countries in Latin America | America               | Upper middle income             | retrospective cohort study | bloodstream infection   | Mixed Enterobacteriaceae | 53  | 202 | in-hospital mortality attributable to infection | 64            | 30   |     |
| Stewardson <sup>79</sup> | 2019 | 2014.8-2015.6  | 10 countries                 | Asia, Africa, America | low and middle income countries | prospective cohort study   | bloodstream infection   | Mixed Enterobacteriaceae | 123 | 174 | in-hospital mortality                           | 35            | 20   |     |

## Meta-analysis results

In the 50 studies identified, a total of 11190 patients were analyzed, 4031 patients infected with resistant pathogens, and 7159 patients infected with susceptible pathogens. Most studies reported higher mortality in patients infected with CRE than in patients with CSE infections, however, the difference is not statistically significant ( $p>0.1$ ) in 12 studies, one study<sup>49</sup> reported the same in-hospital mortality outcome between the two groups and one study<sup>70</sup> observed lower mortality in patients infected with CRE. The reported mortality rates ranged from 6.5%<sup>36</sup> to 94.12%<sup>35</sup> in patients with CRE infections and ranged from 1%<sup>54</sup> to 58.3%<sup>71</sup> in patients with CSE infections. The unweighted means of the mortality of CRE patients and CSE patients reported in each study were 43.99% and 21.33% (Table.2). The result of the meta-analysis based on the outcome measure of risk ratio (RR) suggested that carbapenem resistance has doubled the risk of death (RR, 2.16; 95%CI, 1.85-2.52) in patients infected with *Enterobacteriaceae*. However, high heterogeneity was detected ( $I^2=80.6\%$ ;  $P<0.001$ , Figure.2). In terms of the absolute risk, the meta-analysis results base on the outcome measure of risk difference (RD, 0.22, 95%CI, 0.18-0.26) suggested that CRE infection contributed 22% excess risk of overall mortality compared with CSE infection, but the heterogeneity between studies was also high ( $I^2=78.0\%$ ;  $P<0.001$ , Figure.3).

## Stratified analysis

To explore the heterogeneity between studies and assess the robustness of our findings, we conducted the stratified analysis to evaluate the potential sources of heterogeneity including pathogens, geographic region, economic status of the country, source of infection, resistance mechanism type, sample size, and publication year. One study<sup>79</sup> was not included in our subgroup analysis by geographic region and country income level, because it was conducted in 10 countries with different economic status from three

1  
2  
3  
4 continents. As seen in Table.2, the carbapenem resistance has a significant positive effect on the mortality  
5  
6 for patients infected with *Enterobacteriaceae* in most subgroups, however, it was not significantly  
7  
8 different in mortality between CRE infection and CSE infection in studies focusing on patients infected  
9  
10 with *Escherichia. coli* pathogens (RR, 3.83, 95%CI, 0.46-31.78,  $p=0.214$ ; RD, 0.27, 95%CI, -0.06-0.59,  
11  
12  $p=0.115$ ) as well as studies focusing on patients infected with OXA-producing *Enterobacteriaceae* (RR,  
13  
14 1.87, 95%CI, 0.65-5.37,  $p=0.246$ ; RD, 0.09, 95%CI, -0.09-0.28,  $p=0.306$ ) in both relative and absolute  
15  
16 terms. In the subgroup analysis by infection type, no significant difference in pooled RR of mortality was  
17  
18 observed for studies focusing on patients with urinary tract infections (RR, 2.40, 95%CI, 0.82-7.03,  
19  
20  $p=0.110$ ).

21  
22 The results of the statistical test based on RD showed that the effect of carbapenem resistance on  
23  
24 mortality is significantly different for patients with different infection types ( $p=0.006$ ). For patients with  
25  
26 neurosurgical infection, carbapenem resistance had a greater effect on mortality compared to other types of  
27  
28 infection (Table.2).

### 29 30 31 32 33 34 35 36 37 38 39 40 41 **Meta-regression**

42  
43 To further explore whether the effect of carbapenem resistance on mortality differs by the above variables,  
44  
45 we conducted a univariate meta-regression. In the case of RR (Table.3), the meta-regression results  
46  
47 showed that infection type, publication year might contribute to the heterogeneity between included studies.  
48  
49 Specifically, carbapenem resistance had a significantly greater effect on mortality in studies focusing on  
50  
51 patients with neurosurgical infection compared to studies focusing on bloodstream infection  
52  
53 (coefficient=-0.95,  $p=0.042$ ), urinary tract infection (coefficient=-1.16,  $p=0.039$ ), and studies without  
54  
55 focusing on a specific type of infection (coefficient=-1.065,  $p=0.024$ ). Meta-regression using the year of  
56  
57  
58  
59  
60

1  
2  
3  
4 publication range as a categorical variable showed that compared to studies published between 2017-2020,  
5  
6 the influence of carbapenem resistance on mortality is significantly smaller in studies published between  
7  
8 2011 to 2013 (coefficient=-0.476,  $p=0.007$ ) and 2014 to 2016 (coefficient=-0.366,  $p=0.015$ ). However, the  
9  
10 results from statistical analysis ( $p$ -value between groups) showed no significant difference in risk ratio  
11  
12 between groups of sub-categories. In the case of RD (Table.4), the meta-regression results showed  
13  
14 geographic region and sample size might be the source of heterogeneity between studies. Compared to  
15  
16 studies conducted in Asia, the effect of carbapenem resistance on mortality is significantly smaller in  
17  
18 studies in Africa (coefficient=-0.187,  $p=0.005$ ), but the effect has no difference between studies in other  
19  
20 regions and Asia. Moreover, it was found the effect of carbapenem resistance trend to decrease with the  
21  
22 increase of sample size (coefficient=-0.0001,  $p=0.006$ ).  
23  
24  
25  
26  
27  
28  
29  
30  
31  
32

### 33 **Sensitivity analysis**

34  
35 A sensitivity analysis was performed by removing one study at a time and recalculated the pooled RRs of  
36  
37 remaining studies using random-effects meta-analysis to assess the influence of individual studies on the  
38  
39 results. We found that the direction of the effect did not change when any one study was excluded, which  
40  
41 means the stability of the results of the meta-analysis.  
42  
43  
44  
45  
46  
47  
48

### 49 **Publication bias**

50  
51 Publication bias was assessed by a funnel plot (Figure.4). Slight asymmetrical was observed in the funnel  
52  
53 plots and the points were heavily distributed at the right top, implying a lack of smaller studies that show a  
54  
55 negative association between carbapenem resistance and mortality.  
56  
57  
58  
59  
60

Table.2 Subgroup analysis of the effect of carbapenem resistance on mortality in patients infected with Enterobacteriaceae

| Sub-groups                         | No. of studies | mortality among CRE patients (unweighted means) | mortality among CSE patients (unweighted means) | RR(95%CI)         | P-value (significance tests of RR=1) | I <sup>2</sup> (%) | P-value between groups | RD(95%CI)         | P-value (significance tests of RD=0) | I <sup>2</sup> (%) | P-value between groups |
|------------------------------------|----------------|-------------------------------------------------|-------------------------------------------------|-------------------|--------------------------------------|--------------------|------------------------|-------------------|--------------------------------------|--------------------|------------------------|
|                                    |                |                                                 |                                                 |                   |                                      |                    |                        |                   |                                      |                    |                        |
| <b>Pathogens</b>                   |                |                                                 |                                                 |                   |                                      |                    |                        |                   |                                      |                    |                        |
| Klebsiella pneumoniae              | 39             | 45.51%                                          | 22.05%                                          | 2.12(1.84, 2.45)  | 0.000                                | 68.1               |                        | 0.23(0.19, 0.28)  | 0.000                                | 75.7               |                        |
| Mixed Enterobacteriaceae pathogens | 9              | 35.41%                                          | 17.28%                                          | 2.13(1.41, 3.22)  | 0.000                                | 84.3               | <b>0.073</b>           | 0.17(0.08, 0.25)  | 0.000                                | 80.4               | <b>0.526</b>           |
| Escherichia. coli                  | 2              | 53.06%                                          | 25.50%                                          | 3.83(0.46, 31.78) | 0.214                                | 76.2               |                        | 0.27(-0.06, 0.59) | 0.115                                | 88.6               |                        |
| <b>Geographical region</b>         |                |                                                 |                                                 |                   |                                      |                    |                        |                   |                                      |                    |                        |
| America                            | 15             | 36.16%                                          | 17.63%                                          | 1.96(1.68, 2.28)  | 0.000                                | 0.0                |                        | 0.17(0.11, 0.23)  | 0.000                                | 50.9               |                        |
| Europe                             | 9              | 50.38%                                          | 27.11%                                          | 1.89 (1.43, 2.51) | 0.000                                | 58.9               | <b>0.636</b>           | 0.24(0.14, 0.33)  | 0.000                                | 61.3               | <b>0.338</b>           |
| Asia                               | 24             | 46.16%                                          | 20.25%                                          | 2.37(1.95,2.88)   | 0.000                                | 76.2               |                        | 0.25(0.19, 0.32)  | 0.000                                | 85.5               |                        |
| Africa                             | 1              | 61.10%                                          | 51.70%                                          | 1.18(1.08, 1.29)  | 0.000                                | NA                 |                        | 0.09(0.05, 0.14)  | 0.000                                | NA                 |                        |
| <b>Economic status</b>             |                |                                                 |                                                 |                   |                                      |                    |                        |                   |                                      |                    |                        |
| High income                        | 27             | 42.35%                                          | 21.21%                                          | 1.97(1.68, 2.30)  | 0.000                                | 52.5               |                        | 0.21(0.15, 0.26)  | 0.000                                | 68.4               |                        |
| Upper middle income                | 19             | 42.41%                                          | 17.47%                                          | 2.52(2.03, 3.13)  | 0.000                                | 71.8               | <b>0.329</b>           | 0.25(0.17, 0.32)  | 0.000                                | 85.7               | <b>0.662</b>           |
| Lower middle income                | 3              | 71.74%                                          | 47.23%                                          | 1.44(1.04, 1.98)  | 0.027                                | 71.5               |                        | 0.23(0.01, 0.45)  | 0.041                                | 82.5               |                        |
| <b>Infection type</b>              |                |                                                 |                                                 |                   |                                      |                    |                        |                   |                                      |                    |                        |
| Bloodstream infections             | 21             | 52.72%                                          | 24.72%                                          | 2.20(1.88, 2.57)  | 0.000                                | 65.8               |                        | 0.28(0.22, 0.34)  | 0.000                                | 70.7               |                        |
| Urinary tract infection            | 3              | 25.67%                                          | 12.33%                                          | 2.40(0.82, 7.03)  | 0.110                                | 72.5               |                        | 0.11(0.003, 0.21) | 0.044                                | 29.7               |                        |
| pneumonia                          | 1              | 35.10%                                          | 20.30%                                          | 1.73(1.00, 3.00)  | 0.049                                | NA                 | <b>0.255</b>           | 0.15(0.006, 0.29) | 0.040                                | NA                 | <b>0.006</b>           |
| Neurosurgical infection            | 1              | 69.20%                                          | 12.10%                                          | 5.70(3.22, 10.08) | 0.000                                | NA                 |                        | 0.57(0.38, 0.76)  | 0.000                                | NA                 |                        |
| Mixed                              | 24             | 37.96%                                          | 19.90%                                          | 2.02(1.60, 2.55)  | 0.000                                | 78.0               |                        | 0.17(0.12, 0.22)  | 0.000                                | 70.2               |                        |
| <b>Resistance type</b>             |                |                                                 |                                                 |                   |                                      |                    |                        |                   |                                      |                    |                        |

|                                                                                    |           |               |               |                         |              |             |              |                         |              |             |              |
|------------------------------------------------------------------------------------|-----------|---------------|---------------|-------------------------|--------------|-------------|--------------|-------------------------|--------------|-------------|--------------|
| KPC-producing<br>Enterobacteriaceae                                                | 7         | 52.12%        | 25.52%        | 2.12(1.64, 2.75)        | 0.000        | 49.9        |              | 0.28(0.18, 0.37)        | 0.000        | 52.0        |              |
| OXA-producing<br>Enterobacteriaceae                                                | 2         | 23.05%        | 9.25%         | 1.87(0.65, 5.37)        | 0.246        | 0.0         |              | 0.09(-0.09, 0.28)       | 0.306        | 36.4        |              |
| VIM- producing<br>Enterobacteriaceae                                               | 2         | 44.65%        | 23.90%        | 1.87(1.12, 3.11)        | 0.016        | 24.6        | <b>0.766</b> | 0.20(0.03, 0.37)        | 0.023        | 0.0         | <b>0.717</b> |
| include<br>non-carbapenemase-produ<br>cing strains or multiple<br>resistance types | 39        | 43.57%        | 21.06%        | 2.17(1.83, 2.58)        | 0.000        | 83.1        |              | 0.22(0.17, 0.26)        | 0.000        | 80.5        |              |
| <b>Sample size</b>                                                                 |           |               |               |                         |              |             |              |                         |              |             |              |
| <100                                                                               | 19        | 44.61%        | 22.63%        | 1.94(1.53, 2.46)        | 0.000        | 51.5        |              | 0.21(0.14, 0.29)        | 0.000        | 60.8        |              |
| 100-200                                                                            | 16        | 40.91%        | 18.43%        | 2.33(1.82, 2.98)        | 0.000        | 61.1        | <b>0.521</b> | 0.22(0.14, 0.30)        | 0.000        | 76.9        | <b>0.942</b> |
| >200                                                                               | 15        | 46.50%        | 22.76%        | 2.13(1.67, 2.72)        | 0.000        | 90.9        |              | 0.23(0.16, 0.30)        | 0.000        | 87.8        |              |
| <b>Range of publication<br/>year</b>                                               |           |               |               |                         |              |             |              |                         |              |             |              |
| 2008-2010                                                                          | 4         | 50.83%        | 22.58%        | 2.34(1.75, 3.14)        | 0.000        | 0.0         |              | 0.29(0.20, 0.38)        | 0.000        | 0.0         |              |
| 2011-2013                                                                          | 9         | 53.17%        | 31.31%        | 1.66(1.38, 2.00)        | 0.000        | 31.2        |              | 0.21(0.11, 0.32)        | 0.000        | 67.7        |              |
| 2014-2016                                                                          | 20        | 40.43%        | 21.67%        | 1.84(1.51, 2.24)        | 0.000        | 55.7        | <b>0.143</b> | 0.18(0.12, 0.24)        | 0.000        | 64.3        | <b>0.343</b> |
| 2017-2020                                                                          | 17        | 41.72%        | 15.35%        | 2.83(2.06, 3.88)        | 0.000        | 91.3        |              | 0.25(0.18, 0.32)        | 0.000        | 88.5        |              |
| <b>Total</b>                                                                       | <b>50</b> | <b>43.99%</b> | <b>21.33%</b> | <b>2.14(1.85, 2.48)</b> | <b>0.000</b> | <b>80.0</b> | <b>-</b>     | <b>0.22(0.18, 0.26)</b> | <b>0.000</b> | <b>78.0</b> | <b>-</b>     |

OXA, oxacillinase; KPC, Klebsiella pneumoniae carbapenemase; VIM, Verona integron-encoded MBL



**Table.3 Univariate meta-regression and statistical analysis for the potential variables between studies  
(Outcome measure=risk ratio)**

| Variables                        | Sub-categories                                                           | No. of studies | coefficient | standard error | 95% confidence interval |        | P value from meta-regression |
|----------------------------------|--------------------------------------------------------------------------|----------------|-------------|----------------|-------------------------|--------|------------------------------|
| <b>Pathogen type</b>             | Klebsiella pneumoniae                                                    | 39             | -0.087      | 0.389          | -0.870                  | 0.696  | 0.824                        |
|                                  | Mixed Enterobacteriaceae pathogens                                       | 9              | -0.109      | 0.418          | -0.950                  | 0.731  | 0.795                        |
|                                  | Escherichia. coli                                                        | 2              | reference   | -              | -                       | -      | -                            |
| <b>Geographical region</b>       | America                                                                  | 15             | -0.149      | 0.160          | -0.471                  | 0.173  | 0.357                        |
|                                  | Europe                                                                   | 9              | -0.215      | 0.176          | -0.570                  | 0.139  | 0.228                        |
|                                  | Asia                                                                     | 24             | reference   | -              | -                       | -      | -                            |
|                                  | Africa                                                                   | 1              | -0.690      | 0.355          | -1.405                  | 0.024  | 0.058                        |
| <b>Economic status</b>           | High income                                                              | 27             | reference   | -              | -                       | -      | -                            |
|                                  | Upper middle income                                                      | 19             | 0.235       | 0.134          | -0.034                  | 0.504  | 0.085                        |
|                                  | Lower middle income                                                      | 3              | -0.306      | 0.228          | -0.765                  | 0.153  | 0.186                        |
| <b>Infection type</b>            | Bloodstream infections                                                   | 21             | -0.950      | 0.454          | -1.865                  | -0.036 | 0.042                        |
|                                  | Urinary tract infection                                                  | 3              | -1.160      | 0.545          | -2.258                  | -0.063 | 0.039                        |
|                                  | pneumonia                                                                | 1              | -1.190      | 0.624          | -2.447                  | 0.067  | 0.063                        |
|                                  | Neurosurgical infection                                                  | 1              | reference   | -              | -                       | -      | -                            |
|                                  | Mixed                                                                    | 24             | -1.065      | 0.456          | -1.984                  | -0.146 | 0.024                        |
| <b>Resistance type</b>           | KPC-producing Enterobacteriaceae                                         | 7              | -0.008      | 0.188          | -0.387                  | 0.372  | 0.968                        |
|                                  | OXA-producing Enterobacteriaceae                                         | 2              | -0.112      | 0.617          | -1.354                  | 1.130  | 0.857                        |
|                                  | VIM- producing Enterobacteriaceae                                        | 2              | -0.118      | 0.354          | -0.831                  | 0.596  | 0.741                        |
|                                  | include non-carbapenemase-producing strains or multiple resistance types | 39             | reference   | -              | -                       | -      | -                            |
| <b>Sample size group</b>         | <100                                                                     | 19             | -0.091      | 0.159          | -0.412                  | 0.230  | 0.571                        |
|                                  | 100-200                                                                  | 16             | 0.090       | 0.160          | -0.232                  | 0.412  | 0.577                        |
|                                  | >200                                                                     | 15             | reference   | -              | -                       | -      | -                            |
| <b>Year of publication range</b> | 2008-2010                                                                | 4              | -0.114      | 0.243          | -0.604                  | 0.376  | 0.642                        |
|                                  | 2011-2013                                                                | 9              | -0.476      | 0.167          | -0.813                  | -0.139 | 0.007                        |
|                                  | 2014-2016                                                                | 20             | -0.366      | 0.144          | -0.657                  | -0.075 | 0.015                        |
|                                  | 2017-2020                                                                | 17             | reference   | -              | -                       | -      | -                            |
| <b>Sample size</b>               | -                                                                        | 50             | -0.0001     | 0.0002         | -0.0005                 | 0.0003 | 0.554                        |
| <b>Year of publication</b>       | -                                                                        | 50             | 0.034       | 0.020          | -0.006                  | 0.073  | 0.094                        |

OXA, oxacillinase; KPC, Klebsiella pneumoniae carbapenemase; VIM, Verona integron-encoded MBL

**Table.4 Univariate meta-regression and statistical analysis for the potential variables between studies**  
(Outcome measure=risk difference)

| Variables                 | Sub-categories                                                           | No. of studies | coefficient | standard error | 95% confidence interval |          | P value from meta-regression |
|---------------------------|--------------------------------------------------------------------------|----------------|-------------|----------------|-------------------------|----------|------------------------------|
| Pathogen type             | Klebsiella pneumoniae                                                    | 39             | -0.191      | 0.183          | -0.559                  | 0.178    | 0.303                        |
|                           | Mixed Enterobacteriaceae pathogens                                       | 9              | -0.307      | 0.184          | -0.677                  | 0.063    | 0.102                        |
|                           | Escherichia. coli                                                        | 2              | reference   | -              | -                       | -        | -                            |
| Geographical region       | America                                                                  | 15             | -0.052      | 0.089          | -0.232                  | 0.128    | 0.566                        |
|                           | Europe                                                                   | 9              | -0.075      | 0.096          | -0.268                  | 0.118    | 0.437                        |
|                           | Asia                                                                     | 24             | reference   | -              | -                       | -        | -                            |
|                           | Africa                                                                   | 1              | -0.187      | 0.063          | -0.314                  | -0.059   | 0.005                        |
| Economic status           | High income                                                              | 27             | reference   | -              | -                       | -        | -                            |
|                           | Upper middle income                                                      | 19             | 0.045       | 0.073          | -0.102                  | 0.192    | 0.541                        |
|                           | Lower middle income                                                      | 3              | -0.114      | 0.065          | -0.245                  | 0.017    | 0.086                        |
| Infection type            | Bloodstream infections                                                   | 21             | -0.275      | 0.294          | -0.867                  | 0.318    | 0.355                        |
|                           | Urinary tract infection                                                  | 3              | -0.506      | 0.345          | -1.200                  | 0.189    | 0.149                        |
|                           | pneumonia                                                                | 1              | -0.422      | 0.403          | -1.235                  | 0.390    | 0.301                        |
|                           | Neurosurgical infection                                                  | 1              | reference   | -              | -                       | -        | -                            |
|                           | Mixed                                                                    | 24             | -0.448      | 0.293          | -1.039                  | 0.143    | 0.134                        |
| Resistance type           | KPC-producing Enterobacteriaceae                                         | 7              | 0.073       | 0.097          | -0.122                  | 0.268    | 0.46                         |
|                           | OXA-producing Enterobacteriaceae                                         | 2              | -0.116      | 0.542          | -1.206                  | 0.975    | 0.832                        |
|                           | VIM- producing Enterobacteriaceae                                        | 2              | -0.017      | 0.230          | -0.480                  | 0.447    | 0.943                        |
|                           | include non-carbapenemase-producing strains or multiple resistance types | 39             | reference   | -              | -                       | -        | -                            |
| Sample size group         | <100                                                                     | 19             | 0.019       | 0.089          | -0.160                  | 0.198    | 0.831                        |
|                           | 100-200                                                                  | 16             | 0.051       | 0.084          | -0.119                  | 0.220    | 0.551                        |
|                           | >200                                                                     | 15             | reference   | -              | -                       | -        | -                            |
| Year of publication range | 2008-2010                                                                | 4              | 0.048       | 0.161          | -0.275                  | 0.372    | 0.765                        |
|                           | 2011-2013                                                                | 9              | -0.003      | 0.094          | -0.192                  | 0.186    | 0.974                        |
|                           | 2014-2016                                                                | 20             | -0.031      | 0.078          | -0.189                  | 0.127    | 0.693                        |
|                           | 2017-2020                                                                | 17             | reference   | -              | -                       | -        | -                            |
| Sample size               | -                                                                        | 50             | -0.0001     | 0.00004        | -0.0002                 | -0.00003 | 0.006                        |
| Year of publication       | -                                                                        | 50             | -0.005      | 0.010          | -0.025                  | 0.015    | 0.648                        |

OXA, oxacillinase; KPC, Klebsiella pneumoniae carbapenemase; VIM, Verona integron-encoded MBL

## DISCUSSION

This study systematically reviewed 50 studies and provided a comprehensive analysis of the impact of carbapenem resistance on mortality among patients infected with *Enterobacteriaceae*. Our analysis suggests that carbapenem resistance has doubled the mortality rate of patients infected with CRE compared to patients infected with CSE, and CRE infection can increase the risk of mortality by 22%. The results were consistent with the direction of the previous meta-analysis of the association between carbapenem resistance and mortality among patients infected with *Enterobacteriaceae*.<sup>13,14</sup>

It is necessary to identify the risk factors for worse mortality outcomes in patients with CRE infections. In previous studies, higher mortality among patients with CRE infection was usually explained by patient-, infection-, treatment-, and organism-related factors.<sup>13,14,16,80</sup> Overall, 20 studies included in this review conducted the multivariable analysis to identify risk factors of mortality among patients infected with *Enterobacteriaceae*. After controlling patient-related factors such as age, sex, the severity of underlying illness and comorbidities, three studies<sup>47,51,67</sup> found carbapenem resistance was not associated with increased mortality risk, however, 14 studies found that carbapenem resistance remained an independent predictor of mortality. Besides, therapeutic interventions were also considered as important risk factors for the explanation of the increased mortality in CRE infection. Patients with CRE infection are more likely to receive a delayed administration of initial antibiotic therapy with in-vitro activity<sup>32,33,40,59,62,67,74</sup>, which might lead to a worse outcome. It has been suggested that the effect of carbapenem resistance was probably mediated by inappropriate initial therapy in several studies included in this meta-analysis.<sup>40,51,37</sup> This finding was supported by a recent review, in which a significant association between the differences in the proportion of the patients receiving appropriate initial antibiotic therapy and mortality was identified through a meta-regression analysis including 11 studies.<sup>16</sup> However,

1  
2  
3  
4 nine studies included in our review<sup>32,38,41,47,62,67,71,73,74</sup> did not identify an association between early  
5  
6 appropriate antibiotic therapy and mortality after adjustment for some confounding factors. Instead, other  
7  
8 treatment methods were addressed as important risk factors of mortality in some studies. For example, a  
9  
10 recent meta-analysis including seven studies showed that monotherapy treatment was associated with  
11  
12 significantly higher mortality compared with combination therapy for patients with CRE infections<sup>14</sup>.  
13  
14 Additionally, some studies<sup>72,73</sup> suggested other therapies, such as adjunctive therapy, tigecycline therapy  
15  
16 and the use of aminoglycoside may be associated with mortality among patients infected with *Klebsiella*  
17  
18 *pneumoniae*. The increased mortality among patients with CRE infections might also be related to the  
19  
20 increased virulence of carbapenemase-producing strains. Two studies included in this meta-analysis  
21  
22 showed that isolation of KPC-positive strain was a predictor of mortality among patients infected with  
23  
24 *Klebsiella pneumoniae* independent of the appropriateness of initial treatment and patient  
25  
26 characteristics,<sup>41,55</sup> while another study<sup>47</sup> found KPC-positive status was not associated with mortality  
27  
28 when the virulence score was included in the multivariate analysis. In our subgroup analysis, we identified  
29  
30 an increased risk of mortality associated with KPC- and VIM-producing strains but not with  
31  
32 OXA-producing strains, which may be explained by the different virulence characteristics of the  
33  
34 carbapenem-resistant isolates with different types of carbapenemases.<sup>17</sup> As most of the included studies did  
35  
36 not provide the mortality outcomes after adjustment for confounding factors, we did not calculate the  
37  
38 pooled adjusted effect measures.  
39  
40  
41  
42  
43  
44  
45  
46  
47  
48  
49

50  
51 To investigate the heterogeneity between studies, stratified analysis and meta-regression were  
52  
53 performed. We found that the effect of carbapenem resistance on mortality differs by infection type,  
54  
55 geographic region, sample size and year of publication. The results of the statistical test and  
56  
57 meta-regression analysis identified a significant difference in effect between different infection types. For  
58  
59  
60

1  
2  
3  
4 patients with neurosurgical infection, carbapenem resistance had a significantly greater effect on mortality  
5  
6 compared to other types of infection. The possible explanation could be that CRE meningitis/encephalitis  
7  
8 in neurosurgery can result in more severe morbidity and mortality because of difficulties in treatment.<sup>74</sup> In  
9  
10 addition, we found that the effect of carbapenem resistance on mortality in Africa is significantly smaller  
11  
12 compared with studies in Asia in the case of RD, but no significant difference was identified between  
13  
14 studies in America, Europe and Asia. This could be due to both high mortality rates in patients (61.1%)  
15  
16 and CSE patients (51.7%) reported in only one study in Africa, which might be related to the low level of  
17  
18 medical care and poor hygiene. We also found that with the increase of sample size, the RD had a  
19  
20 decreasing trend, indicating that the absolute risk difference of mortality between CRE and CSE infection  
21  
22 tends to be stable with larger sample size. Moreover, it should be noted that the effect of carbapenem  
23  
24 resistance on mortality is greater in studies published from 2017-2020 compared to previous studies in  
25  
26 relative terms. On the one hand, the mortality of CRE infection remains high as it is a therapeutic  
27  
28 challenge due to limited effective antibiotics. What's worse, carbapenem-resistant *Enterobacteriaceae*  
29  
30 have started to develop resistance against some key antibiotics such as colistin,<sup>81</sup> resulting in increased  
31  
32 difficulties for treatment for CRE infection. As shown in a previous study,<sup>16</sup> the proportion of CRKP  
33  
34 patients receiving appropriate initial antibiotic therapy did not change over time. In addition, another  
35  
36 study<sup>11</sup> observed higher mortality of CRE infection from studies published from 2014 to 2016 than those  
37  
38 published from 2009 to 2013. On the other hand, the mortality of CSE infection tends to decrease in recent  
39  
40 years and the unweighted mean of mortality among CSE patients in studies conducted from 2017-2020 is  
41  
42 15.35%, lower than that of other ranges of publication year (Table.2). This could be due to the increasing  
43  
44 treatment success rate with the development of medical technology and medical treatment, which may  
45  
46 enlarge the differences in mortality between CRE and CSE infections.  
47  
48  
49  
50  
51  
52  
53  
54  
55  
56  
57  
58  
59  
60

1  
2  
3  
4 To our knowledge, this is the most comprehensive meta-analysis so far to assess the impact of  
5  
6 carbapenem resistance on mortality among patients infected with *Enterobacteriaceae*. Nearly 20 new  
7  
8 studies published in recent three years that have been included in our study. Although high heterogeneity  
9  
10 was observed between studies, sensitivity analysis suggested that no single study influenced the pooled RR,  
11  
12 indicating the stability of the results of the meta-analysis. This is the first review to explore the source of  
13  
14 heterogeneity between studies through statistical tests and meta-regression analysis of potential variables  
15  
16 in consideration of country economic status and geographic region.  
17  
18  
19  
20  
21

22 Our study also has several limitations. Firstly, we only include two clinically important  
23  
24 *Enterobacteriaceae* species, *Klebsiella pneumoniae* and *Escherichia coli*. and only included studies  
25  
26 published in English. Secondly, we only calculated the unadjusted results, many confounding factors such  
27  
28 as the health condition of patients, therapy options are not adjusted in the analysis because of data  
29  
30 limitation. At last, minor publication bias was observed, possibly due to the lack of smaller studies from  
31  
32 low-income countries. Therefore, more studies that quantifying the attributable mortality of CRE in  
33  
34 low-income countries are needed to provide reliable data for the decision-makers about the great threat of  
35  
36 CRE to promote interventions to reduce its consequences.  
37  
38  
39  
40  
41  
42  
43  
44  
45

## 46 CONCLUSIONS

47  
48 The results of this meta-analysis suggested that carbapenem resistance was associated with an increased  
49  
50 risk of mortality for patients infected with *Enterobacteriaceae*. The subgroup analysis and meta-regression  
51  
52 showed the effect of carbapenem resistance differs by infection type, geographic region, sample size and  
53  
54 publication year. In further research, more studies need to be conducted in low-income countries to provide  
55  
56  
57  
58  
59  
60

1  
2  
3  
4 sound evidence to draw resources to fight against CRE and suggest the way forward for alleviating the  
5  
6 implications.  
7  
8  
9  
10  
11  
12  
13  
14  
15

16 **Contributors** All authors were involved in the design and development of the study. The review was  
17 designed by XF, RZ, RZ, JL, JS, TRW, and YW. The literature search in electronic databases was  
18 conducted by JZ, SS, SC and XZ. RZ and JZ screened all studies for inclusion into the systematic review  
19 and performed the assessments of risk bias for all studies. RY and JZ performed data extraction. All  
20 authors contributed to data interpretation and data analysis. RZ drafted the manuscript and all authors  
21 revised it critically for content. All authors have reviewed the results and approved the final version of the  
22 manuscript and agreed to be accountable for all aspects of the work in ensuring that questions related to the  
23 accuracy or integrity of any part of the work are appropriately investigated and resolved. The  
24 corresponding author (XF) attests that all listed authors meet authorship criteria and that no others meeting  
25 the criteria have been omitted.  
26  
27  
28  
29  
30  
31  
32  
33  
34  
35  
36  
37

38 **Competing interests** None declared  
39  
40  
41

42 **Funding** This work was supported by the National Natural Science Foundation of China (NSFC) (Grant  
43 numbers 81861138051, 81861138052 and 81861138053)  
44  
45  
46  
47

48 **Data sharing** No additional data available  
49  
50  
51  
52  
53  
54  
55  
56  
57  
58  
59  
60

## REFERENCES

1. Center for Disease Control and Prevention(US). Clinicians: Information about CRE, 2019. Available: <https://www.cdc.gov/hai/organisms/cre/cre-clinicians.html>[accessed 19 Dec 2020].
2. Birnbaum J, Kahan FM, Kropp H, *et al*. Carbapenems, a new class of beta-lactam antibiotics: discovery and development of imipenem/cilastatin. *Am J Med* 1985;78:3-21.
3. Paterson DL, Ko W-C, Von Gottberg A, *et al*. Antibiotic Therapy for Klebsiella pneumoniae Bacteremia: Implications of Production of Extended-Spectrum  $\beta$ -Lactamases. *Clin Infect Dis* 2004;39:31-7. doi: 10.1086/420816. [Epub ahead of print: 08 Jun 2004].
4. Osano E, Arakawa Y, Wacharotayankun R, *et al*. Molecular characterization of an enterobacterial metallo beta-lactamase found in a clinical isolate of Serratia marcescens that shows imipenem resistance. *Antimicrob Agents Chemother* 1994;38:71-8.
5. Lauretti L, Riccio ML, Mazzariol A, *et al*. Cloning and characterization of bla VIM, a new integron-borne metallo- $\beta$ -lactamase gene from a Pseudomonas aeruginosa clinical isolate. *Antimicrob Agents Chemother* 1999;43:1584-90.
6. Yigit H, Queenan AM, Anderson GJ, *et al*. Novel carbapenem-hydrolyzing  $\beta$ -lactamase, KPC-1, from a carbapenem-resistant strain of Klebsiella pneumoniae. *Antimicrob Agents Chemother* 2001;45:1151-61
7. Iovleva A, Doi Y. Carbapenem-Resistant Enterobacteriaceae. *Clin Lab Med* 2017;37:303-315. doi: 10.1016/j.cll.2017.01.005. [Epub ahead of print: 11 Mar 2017].
8. Logan LK, Weinstein RA. The Epidemiology of Carbapenem-Resistant Enterobacteriaceae: The Impact and Evolution of a Global Menace. *J Infect Dis* 2017;215(suppl\_1):S28-S36
9. European Centre for Disease Control and Prevention. Antimicrobial resistance surveillance in Europe 2018, 2019. Available: <https://www.ecdc.europa.eu/en/publications-data/surveillance-antimicrobial-resistance-europe-2018>[accessed 19 Dec 2020].
10. World Health Organization. Global priority list of antibiotic-resistant bacteria to guide research, discovery, and development of new antibiotics, 2017. Available: <https://www.who.int/medicines/publications/global-priority-list-antibiotic-resistant-bacteria/en/>[accessed 19 Dec 2020].
11. Ramos-Castaneda JA, Ruano-Ravina A, Barbosa-Lorenzo R, *et al*. Mortality due to KPC carbapenemase-producing Klebsiella pneumoniae infections: Systematic review and meta-analysis: Mortality due to KPC Klebsiella pneumoniae infections. *J Infect* 2018;76:438-448. doi: 10.1016/j.jinf.2018.02.007. [Epub ahead of print: 01 Mar 2018].
12. Budhram DR, Mac S, Bielecki JM, *et al*. Health outcomes attributable to carbapenemase-producing Enterobacteriaceae infections: A systematic review and meta-analysis. *Infect Control Hosp Epidemiol* 2020;41:37-43. doi: 10.1017/ice.2019.282. [Epub ahead of print: 22 Oct 2019].
13. Soontaros S, Leelakanok N. Association between carbapenem-resistant Enterobacteriaceae and death: A systematic review and meta-analysis. *Am J Infect Control* 2019;47:1200-1212. doi: 10.1016/j.ajic.2019.03.020. [Epub ahead of print: 7 May 2019].
14. Martin A, Fahrback K, Zhao Q, *et al*. Association Between Carbapenem Resistance and Mortality Among Adult, Hospitalized Patients With Serious Infections Due to Enterobacteriaceae: Results of a Systematic Literature Review and Meta-analysis. *Open Forum Infect Dis* 2018;5:ofy150.



15. Xu L, Sun X, Ma X. Systematic review and meta-analysis of mortality of patients infected with carbapenem-resistant *Klebsiella pneumoniae*. *Ann Clin Microbiol Antimicrob* 2017;16:18.
16. Kohler PP, Volling C, Green K, *et al*. Carbapenem Resistance, Initial Antibiotic Therapy, and Mortality in *Klebsiella pneumoniae* Bacteremia: A Systematic Review and Meta-Analysis. *Infect Control Hosp Epidemiol* 2017;38:1319-1328. doi: 10.1017/ice.2017.197. [Epub ahead of print: 27 Sep 2017].
17. Falagas ME, Tensarli GS, Karageorgopoulos DE, *et al*. Deaths Attributable to Carbapenem-Resistant Enterobacteriaceae Infections. *Emerg Infect Dis* 2014;20:1170-5.
18. Laxminarayan R, Heymann DL. Challenges of drug resistance in the developing world. *BMJ* 2012;344:e1567.
19. Higgins JPT, Green S. Cochrane handbook for systematic reviews of interventions. Version 5.1.0. [updated March 2011]. London: Cochrane Collaboration; 2011. Available: [https:// handbook -5 -1 .cochrane .org/](https://handbook-5-1.cochrane.org/)[accessed 19 Dec 2020].
20. Moher D, Liberati A, Tetzlaff J, *et al*. Preferred Reporting Items for Systematic Reviews and Meta-Analyses: The PRISMA Statement. *BMJ* 2009;339:b2535.
21. Suay-Garcia B, Perez-Gracia MT. Present and Future of Carbapenem-resistant Enterobacteriaceae (CRE) Infections. *Antibiotics (Basel)* 2019;8:122.
22. World Bank. World bank country and lending groups[Internet]. Data, 2019. Available: <https://datahelpdesk.worldbank.org/knowledgebase/articles/906519-world-bank-country-and-lending-groups> [Accessed 20 Jun 2020].
23. Sinclair JC, Bracken MB. Clinically useful measures of effect in binary analyses of randomized trials. *J Clin Epidemiol* 1994;47(8):881-9.
24. Sackett DL, Deeks JJ, Altman DG. Down with odds ratios! *BMJ Evid Based Med* 1996; 1: 164-166.
25. Schmidt CO, Kohlmann T. When to use the odds ratio or the relative risk? *Int J Public Health* 2008;53:165-7.
26. Noordzij M, van Diepen M, Caskey FC, *et al*. Relative risk versus absolute risk: one cannot be interpreted without the other. *Nephrology, Dialysis, Transplantation : Official Publication of the European Dialysis and Transplant Association - European Renal Association*. 2017 Apr;32(suppl\_2).
27. Schulz KF, Altman DG, Moher D; CONSORT Group. CONSORT 2010 statement: updated guidelines for reporting parallel group randomised trials. *Int J Surg*. 2011;9(8):672-7. doi: 10.1016/j.ijsu.2011.09.004. Epub 2011 Oct 13.
28. DerSimonian R, Laird N. Meta-analysis in clinical trials. *Control Clin Trials*. 1986 Sep;7(3):177-88. doi: 10.1016/0197-2456(86)90046-2.
29. Wells GA, Shea B, O'Connell D, *et al*. The Newcastle-Ottawa Scale (NOS) for assessing the quality of nonrandomised studies in meta-analyses. Ottawa: Ottawa Hospital Research Institute; 2014.
30. Alicino C, Giacobbe DR, Orsi A, *et al*. Trends in the annual incidence of carbapenem-resistant *Klebsiella pneumoniae* bloodstream infections: a 8-year retrospective study in a large teaching hospital in northern Italy. *BMC Infect Dis* 2015;15:415.
31. Balkhair A, Al-Muharrmi Z, Al'Adawi B, *et al*. Prevalence and 30-day all-cause mortality of carbapenem-and colistin-resistant bacteraemia caused by *Acinetobacter baumannii*, *Pseudomonas*

- aeruginosa, and *Klebsiella pneumoniae*: Description of a decade-long trend. *Int J Infect Dis* 2019;85:10-15. doi: 10.1016/j.ijid.2019.05.004. [Epub ahead of print: 14 May 2019].
32. Ben-David D, Kordevani R, Keller N, *et al.* Outcome of carbapenem resistant *Klebsiella pneumoniae* bloodstream infections. *Clin Microbiol Infect* 2012;18:54-60. doi: 10.1111/j.1469-0691.2011.03478.x. [Epub ahead of print: 01 Jul 2011].
33. Brizendine KD, Richter SS, Cober ED, *et al.* Carbapenem-resistant *Klebsiella pneumoniae* urinary tract infection following solid organ transplantation. *Antimicrob Agents Chemother* 2015;59:553-7. doi: 10.1128/AAC.04284-14. [Epub ahead of print: 10 Nov 2014].
34. Chang H, Wei J, Zhou W, *et al.* Risk factors and mortality for patients with Bloodstream infections of *Klebsiella pneumoniae* during 2014-2018: Clinical impact of carbapenem resistance in a large tertiary hospital of China. *J Infect Public Health* 2020;13:784-790. doi: 10.1016/j.jiph.2019.11.014. [Epub ahead of print: 13 Dec 2019].
35. Chang HJ, Hsu PC, Yang CC, *et al.* Risk factors and outcomes of carbapenem-nonsusceptible *Escherichia coli* bacteremia: A matched case-control study. *J Microbiol Immunol Infect* 2011;44:125-30. doi: 10.1016/j.jmii.2010.06.001. [Epub ahead of print: 14 Jan 2011].
36. Chiotos K, Tamma PD, Flett KB, *et al.* Increased 30-day mortality associated with carbapenem-resistant Enterobacteriaceae in children. *Open Forum Infect Dis* 2018;5:ofy222.
37. Cienfuegos-Gallet AV, Ocampo de Los Rios AM, Sierra Viana P, *et al.* Risk factors and survival of patients infected with carbapenem-resistant *Klebsiella pneumoniae* in a KPC endemic setting: a case-control and cohort study. *BMC Infect Dis* 2019;19:830.
38. Correa L, Martino MD, Siqueira I, *et al.* A hospital-based matched case-control study to identify clinical outcome and risk factors associated with carbapenem-resistant *Klebsiella pneumoniae* infection. *BMC Infect Dis* 2013;13:80.
39. Cubero M, Cuervo G, Dominguez Mn, *et al.* Carbapenem-resistant and carbapenem-susceptible isogenic isolates of *Klebsiella pneumoniae* ST101 causing infection in a tertiary hospital. *BMC Microbiol* 2015;15:177.
40. Daikos GL, Petrikkos P, Psychogiou M, *et al.* Prospective observational study of the impact of VIM-1 metallo- $\beta$ -lactamase on the outcome of patients with *Klebsiella pneumoniae* bloodstream infections. *Antimicrob Agents Chemother* 2009;53:1868-73. doi: 10.1128/AAC.00782-08. [Epub ahead of print: 17 Feb 2009].
41. Fraenkel-Wandel Y, Raveh-Brawer D, Wiener-Well Y, *et al.* Mortality due to blaKPC*Klebsiella pneumoniae* bacteraemia. *J Antimicrob Chemother* 2016;71:1083-7. doi: 10.1093/jac/dkv414. [Epub ahead of print: 11 Dec 2015].
42. Gallagher JC, Kuriakose S, Haynes K, *et al.* Case-Case-Control Study of Patients with Carbapenem-Resistant and Third-Generation-Cephalosporin-Resistant *Klebsiella pneumoniae* Bloodstream Infections. *Antimicrob Agents Chemother* 2014;58:5732-5. doi: 10.1128/AAC.03564-14. [Epub ahead of print: 14 Jul 2014].
43. Garbati MA, Sakkijha H, Abushaheen A. Infections due to Carbapenem Resistant Enterobacteriaceae among Saudi Arabian Hospitalized Patients: A Matched Case-Control Study. *Biomed Res Int* 2016;2016:3961684. doi: 10.1155/2016/3961684. [Epub ahead of print: 06 Apr 2016].
44. Gomez Rueda V, Zuleta Tobon JJ. Risk factors for infection with carbapenem-resistant *Klebsiella pneumoniae*: a case-case-control study. *Colomb Med (Cali)* 2014;45:54-60.

- 1  
2  
3  
4 45. Hoxha A, Karki T, Giambi C, *et al.* Attributable mortality of carbapenem-resistant *Klebsiella pneumoniae* infections in a prospective matched cohort study in Italy, 2012-2013. *J Hosp Infect* 2016;92:61-6. doi: 10.1016/j.jhin.2015.06.018. [Epub ahead of print: 29 Jul 2015].
- 6  
7  
8 46. Huang W, Qiao F, Zhang Y, *et al.* In-hospital Medical Costs of Infections Caused by Carbapenem-resistant *Klebsiella pneumoniae*. *Clin Infect Dis* 2018;67(suppl\_2):S225-S230.
- 10  
11  
12 47. Hussein K, Raz-Pasteur A, Finkelstein R, *et al.* Impact of carbapenem resistance on the outcome of patients' hospital-acquired bacteraemia caused by *Klebsiella pneumoniae*. *J Hosp Infect* 2013;83:307-13. doi: 10.1016/j.jhin.2012.10.012. [Epub ahead of print: 10 Jan 2013].
- 14  
15  
16 48. Kotb S, Lyman M, Ismail G, *et al.* Epidemiology of Carbapenem-resistant Enterobacteriaceae in Egyptian intensive care units using National Healthcare-associated Infections Surveillance Data, 2011-2017. *Antimicrob Resist Infect Control* 2020;9:2.
- 18  
19  
20 49. Lee HJ, Choi JK, Cho SY, *et al.* Carbapenem-resistant Enterobacteriaceae: Prevalence and Risk Factors in a Single Community-Based Hospital in Korea. *Infect Chemother* 2016;48:166-173. doi: 10.3947/ic.2016.48.3.166. [Epub ahead of print: 08 Sep 2016].
- 22  
23  
24 50. Li Y, Shen H, Zhu C, *et al.* Carbapenem-resistant *klebsiella pneumoniae* infections among ICU admission patients in Central China: prevalence and prediction model. *Biomed Res Int* 2019;2019:9767313.
- 26  
27  
28 51. Liu J, Wang H, Huang Z, *et al.* Risk factors and outcomes for carbapenem-resistant *Klebsiella pneumoniae* bacteremia in onco-hematological patients. *J Infect Dev Ctries* 2019;13:357-364.
- 29  
30  
31 52. Liu SW, Chang HJ, Chia JH, *et al.* Outcomes and characteristics of ertapenem-nonsusceptible *Klebsiella pneumoniae* bacteremia at a university hospital in Northern Taiwan: a matched case-control study. *J Microbiol Immunol Infect* 2012;45:113-9. doi: 10.1016/j.jmii.2011.09.026. [Epub ahead of print: 11 Dec 2011].
- 33  
34  
35 53. McLaughlin MM, Advincula MR, Malczynski M, *et al.* Quantifying the clinical virulence of *Klebsiella pneumoniae* producing carbapenemase *Klebsiella pneumoniae* with a *Galleria mellonella* model and a pilot study to translate to patient outcomes. *BMC Infect Dis* 2014;14:31.
- 37  
38  
39 54. Meng X, Liu S, Duan J, *et al.* Risk factors and medical costs for healthcare-associated carbapenem-resistant *Escherichia coli* infection among hospitalized patients in a Chinese teaching hospital. *BMC Infect Dis* 2017;17:82.
- 41  
42  
43 55. Mouloudi E, Protonotariou E, Zagorianou A, *et al.* Bloodstream Infections Caused by Metallo-beta-Lactamase/*Klebsiella pneumoniae* Carbapenemase-Producing *K. pneumoniae* among Intensive Care Unit Patients in Greece: Risk Factors for Infection and Impact of Type of Resistance on Outcomes. *Infect Control Hosp Epidemiol* 2010;31:1250-6. doi: 10.1086/657135. [Epub ahead of print: 25 Oct 2010].
- 48  
49  
50 56. Ny P, Nieberg P, Wong-Beringer A. Impact of carbapenem resistance on epidemiology and outcomes of nonbacteremic *Klebsiella pneumoniae* infections. *Am J Infect Control* 2015;43:1076-80. doi: 10.1016/j.ajic.2015.06.008. [Epub ahead of print: 17 Jul 2015].
- 52  
53  
54 57. Orsi GB, Bencardino A, Vena A, *et al.* Patient risk factors for outer membrane permeability and KPC-producing carbapenem-resistant *Klebsiella pneumoniae* isolation: results of a double case-control study. *Infection*. 2013 Feb;41(1):61-7. doi: 10.1007/s15010-012-0354-2. [Epub ahead of print: 16 Oct 2012].
- 56  
57  
58 58. Pan H, Lou Y, Zeng L, *et al.* Infections caused by carbapenemase-producing *klebsiella pneumoniae*: Microbiological characteristics and risk factors. *Microb Drug Resist* 2019;25:287-296. doi: 10.1089/mdr.2018.0339. [Epub ahead of print: 27 Feb 2019].
- 59  
60

- 1
  - 2
  - 3
  - 4
  - 5
  - 6
  - 7
  - 8
  - 9
  - 10
  - 11
  - 12
  - 13
  - 14
  - 15
  - 16
  - 17
  - 18
  - 19
  - 20
  - 21
  - 22
  - 23
  - 24
  - 25
  - 26
  - 27
  - 28
  - 29
  - 30
  - 31
  - 32
  - 33
  - 34
  - 35
  - 36
  - 37
  - 38
  - 39
  - 40
  - 41
  - 42
  - 43
  - 44
  - 45
  - 46
  - 47
  - 48
  - 49
  - 50
  - 51
  - 52
  - 53
  - 54
  - 55
  - 56
  - 57
  - 58
  - 59
  - 60
59. Patel G, Huprikar S, Factor SH, *et al.* Outcomes of carbapenem-resistant *Klebsiella pneumoniae* infection and the impact of antimicrobial and adjunctive therapies. *Infect Control Hosp Epidemiol* 2008;29:1099-106.
60. Pereira MR, Scully BF, Pouch SM, *et al.* Risk factors and outcomes of carbapenem-resistant *Klebsiella pneumoniae* infections in liver transplant recipients. *Liver Transpl* 2015;21:1511-9.
61. Pouch SM, Kubin CJ, Satlin MJ, *et al.* Epidemiology and outcomes of carbapenem-resistant *Klebsiella pneumoniae* bacteriuria in kidney transplant recipients. *Transpl Infect Dis* 2015;17:800-9. doi: 10.1111/tid.12450. [Epub ahead of print: 05 Nov 2015].
62. Qureshi ZA, Paterson DL, Peleg AY, *et al.* Clinical characteristics of bacteraemia caused by extended-spectrum  $\beta$ -lactamase-producing Enterobacteriaceae in the era of CTX-M-type and KPC-type  $\beta$ -lactamases. *Clin Microbiol Infect* 2012;18:887-93. doi: 10.1111/j.1469-0691.2011.03658.x. [Epub ahead of print: 26 Sep 2011].
63. Sánchez-Romero I, Asensio Á, Oteo J, *et al.* Nosocomial outbreak of VIM-1-producing *Klebsiella pneumoniae* isolates of multilocus sequence type 15: molecular basis, clinical risk factors, and outcome. *Antimicrob Agents Chemother* 2012;56:420-7. doi: 10.1128/AAC.05036-11. [Epub ahead of print: 17 Oct 2011].
64. Schwaber MJ, Klarfeld-Lidji S, Navon-Venezia S, *et al.* Predictors of carbapenem-resistant *Klebsiella pneumoniae* acquisition among hospitalized adults and effect of acquisition on mortality. *Antimicrob Agents Chemother* 2008;52:1028-33. doi: 10.1128/AAC.01020-07. [Epub ahead of print: 17 Dec 2007].
65. Shilo S, Assous MV, Lachish T, *et al.* Risk factors for bacteriuria with carbapenem-resistant *Klebsiella pneumoniae* and its impact on mortality: a case-control study. *Infection* 2013;41:503-9. doi: 10.1007/s15010-012-0380-0. [Epub ahead of print: 28 Dec 2012].
66. Simkins J, Muggia V, Cohen HW, *et al.* Carbapenem-resistant *Klebsiella pneumoniae* infections in kidney transplant recipients: a case-control study. *Transpl Infect Dis* 2014;16:775-82. doi: 10.1111/tid.12276. [Epub ahead of print: 05 Aug 2014].
67. Tian L, Tan R, Chen Y, *et al.* Epidemiology of *Klebsiella pneumoniae* bloodstream infections in a teaching hospital: factors related to the carbapenem resistance and patient mortality. *Antimicrob Resist Infect Control* 2016;5:48.
68. Torres-Gonzalez P, Ortiz-Brizuela E, Cervera-Hernandez ME, *et al.* Associated factors and outcomes for OXA-232 Carbapenem-resistant Enterobacteriaceae infections in a tertiary care centre in Mexico City: A case-control-control study. *Diagn Microbiol Infect Dis* 2016;86:243-8. doi: 10.1016/j.diagmicrobio.2016.07.002. [Epub ahead of print: 07 Jul 2016].
69. Trecarichi EM, Pagano L, Martino B, *et al.* Bloodstream infections caused by *Klebsiella pneumoniae* in onco-hematological patients: clinical impact of carbapenem resistance in a multicentre prospective survey. *Am J Hematol* 2016;91:1076-1081. doi: 10.1002/ajh.24489. [Epub ahead of print: 29 Jul 2016].
70. Ulu AC, Kurtaran B, Inal AS, *et al.* Risk factors of carbapenem-resistant *Klebsiella pneumoniae* infection: a serious threat in ICUs. *Med Sci Monit* 2015;21:219-24.
71. Vardakas KZ, Matthaïou DK, Falagas ME, *et al.* Characteristics, risk factors and outcomes of carbapenem-resistant *Klebsiella pneumoniae* infections in the intensive care unit. *J Infect* 2015;70:592-9. doi: 10.1016/j.jinf.2014.11.003. [Epub ahead of print: 15 Nov 2014].
72. Wang Z, Qin RR, Huang L, *et al.* Risk Factors for Carbapenem-resistant *Klebsiella pneumoniae* Infection and Mortality of *Klebsiella pneumoniae* Infection. *Chin Med J (Engl)* 2018;131:56-62.

- 1  
2  
3  
4 73. Xiao T, Yu W, Niu T, *et al.* A retrospective, comparative analysis of risk factors and outcomes in  
5 carbapenem-susceptible and carbapenem-nonsusceptible *Klebsiella pneumoniae* bloodstream  
6 infections: tigecycline significantly increases the mortality. *Infect Drug Resist* 2018;11:595-606.  
7  
8 74. Zhang Y, Guo LY, Song WQ, *et al.* Risk factors for carbapenem-resistant *K. pneumoniae*  
9 bloodstream infection and predictors of mortality in Chinese paediatric patients. *BMC Infect Dis*  
10 2018;18:248.  
11  
12 75. Zheng S-H, Cao S-J, Xu H, *et al.* Risk factors, outcomes and genotypes of  
13 carbapenem-nonsusceptible *Klebsiella pneumoniae* bloodstream infection: a three-year  
14 retrospective study in a large tertiary hospital in Northern China. *Infect Dis (Lond)*  
15 2018;50:443-451. doi: 10.1080/23744235.2017.1421772. [Epub ahead of print: 05 Jan 2018].  
16  
17 76. Zheng G, Jing L, Guojun Z, *et al.* Epidemiology and risk factors of neurosurgical bacterial  
18 meningitis/encephalitis induced by carbapenem resistant Enterobacteriaceae. *J Infect Chemother*  
19 2020;26:101-106. doi: 10.1016/j.jiac.2019.07.023. [Epub ahead of print: 21 Aug 2019].  
20  
21 77. Zuo Y, Zhao D, Song G, *et al.* Risk Factors, Molecular Epidemiology, and Outcomes of  
22 Carbapenem-Resistant *Klebsiella pneumoniae* Infection for Hospital-Acquired Pneumonia: A  
23 Matched Case-Control Study in Eastern China During 2015–2017. *Microb Drug Resist* 2020. doi:  
24 10.1089/mdr.2020.0162. [Epub ahead of print: 02 Jul 2020].  
25  
26 78. Villegas MV, Pallares CJ, Escandón-Vargas K, *et al.* Characterization and Clinical Impact of  
27 Bloodstream Infection Caused by Carbapenemase-Producing Enterobacteriaceae in Seven Latin  
28 American Countries. *PLoS One*. 2016 Apr 22;11(4):e0154092.  
29  
30 79. Stewardson AJ, Marimuthu K, Sengupta S, *et al.* Effect of carbapenem resistance on outcomes of  
31 bloodstream infection caused by Enterobacteriaceae in low-income and middle-income countries  
32 (PANORAMA): a multinational prospective cohort study. *Lancet Infect Dis*. 2019  
33 Jun;19(6):601-610. Epub 2019 Apr 29.  
34  
35 80. Paño Pardo JR, Serrano Villar S, Ramos Ramos JC, *et al.* Infections caused by  
36 carbapenemase-producing Enterobacteriaceae: risk factors, clinical features and prognosis. *Enferm*  
37 *Infecc Microbiol Clin*. 2014 Dec;32 Suppl 4:41-8.  
38  
39 81. Sader HS, Castanheira M, Duncan LR, *et al.* Antimicrobial Susceptibility of Enterobacteriaceae  
40 and *Pseudomonas aeruginosa* Isolates from United States Medical Centers Stratified by Infection  
41 Type: Results from the International Network for Optimal Resistance Monitoring (INFORM)  
42 Surveillance Program, 2015-2016. *Diagn Microbiol Infect Dis*. 2018 Sep;92(1):69-74.  
43  
44  
45  
46  
47  
48  
49  
50  
51  
52  
53  
54  
55  
56  
57  
58  
59  
60

1  
2  
3  
4  
5  
6  
7 **Figure legends**  
8  
9  
10

11 **Figure.1 Flow chart of the study selection process for the meta-analysis**

12  
13  
14 **Figure.2 Forest plot of overall mortality in patients with carbapenem-resistant *Enterobacteriaceae***  
15 **(CRE) versus carbapenem-susceptible *Enterobacteriaceae* (CSE) infections (outcome**  
16 **measure = relative risk).**  
17  
18  
19  
20  
21

22 **Figure.3 Forest plot of overall mortality in patients with carbapenem-resistant *Enterobacteriaceae***  
23 **(CRE) versus carbapenem-susceptible *Enterobacteriaceae* (CSE) infections (outcome**  
24 **measure = risk difference).**  
25  
26  
27  
28  
29

30 **Figure.4 Funnel plot of studies evaluating mortality of patients with infections due to**  
31 **carbapenem-resistant compared to carbapenem-susceptible *Enterobacteriaceae*.**  
32  
33  
34  
35  
36  
37  
38  
39  
40  
41  
42  
43  
44  
45  
46  
47  
48  
49  
50  
51  
52  
53  
54  
55  
56  
57  
58  
59  
60



**Licence statement**

I, the Submitting Author has the right to grant and does grant on behalf of all authors of the Work (as defined in the below author licence), an exclusive licence and/or a non-exclusive licence for contributions from authors who are: i) UK Crown employees; ii) where BMJ has agreed a CC-BY licence shall apply, and/or iii) in accordance with the terms applicable for US Federal Government officers or employees acting as part of their official duties; on a worldwide, perpetual, irrevocable, royalty-free basis to BMJ Publishing Group Ltd (“BMJ”) its licensees and where the relevant Journal is co-owned by BMJ to the co-owners of the Journal, to publish the Work in BMJ Open and any other BMJ products and to exploit all rights, as set out in our [licence](#).

The Submitting Author accepts and understands that any supply made under these terms is made by BMJ to the Submitting Author unless you are acting as an employee on behalf of your employer or a postgraduate student of an affiliated institution which is paying any applicable article publishing charge (“APC”) for Open Access articles. Where the Submitting Author wishes to make the Work available on an Open Access basis (and intends to pay the relevant APC), the terms of reuse of such Open Access shall be governed by a Creative Commons licence – details of these licences and which [Creative Commons](#) licence will apply to this Work are set out in our licence referred to above.

1  
2  
3  
4  
5  
6  
7  
8  
9  
10  
11  
12  
13  
14  
15  
16  
17  
18  
19  
20  
21  
22  
23  
24  
25  
26  
27  
28  
29  
30  
31  
32  
33  
34  
35  
36  
37  
38  
39  
40  
41  
42  
43  
44  
45  
46  
47  
48  
49  
50  
51  
52  
53  
54  
55  
56  
57  
58  
59  
60

For peer review only



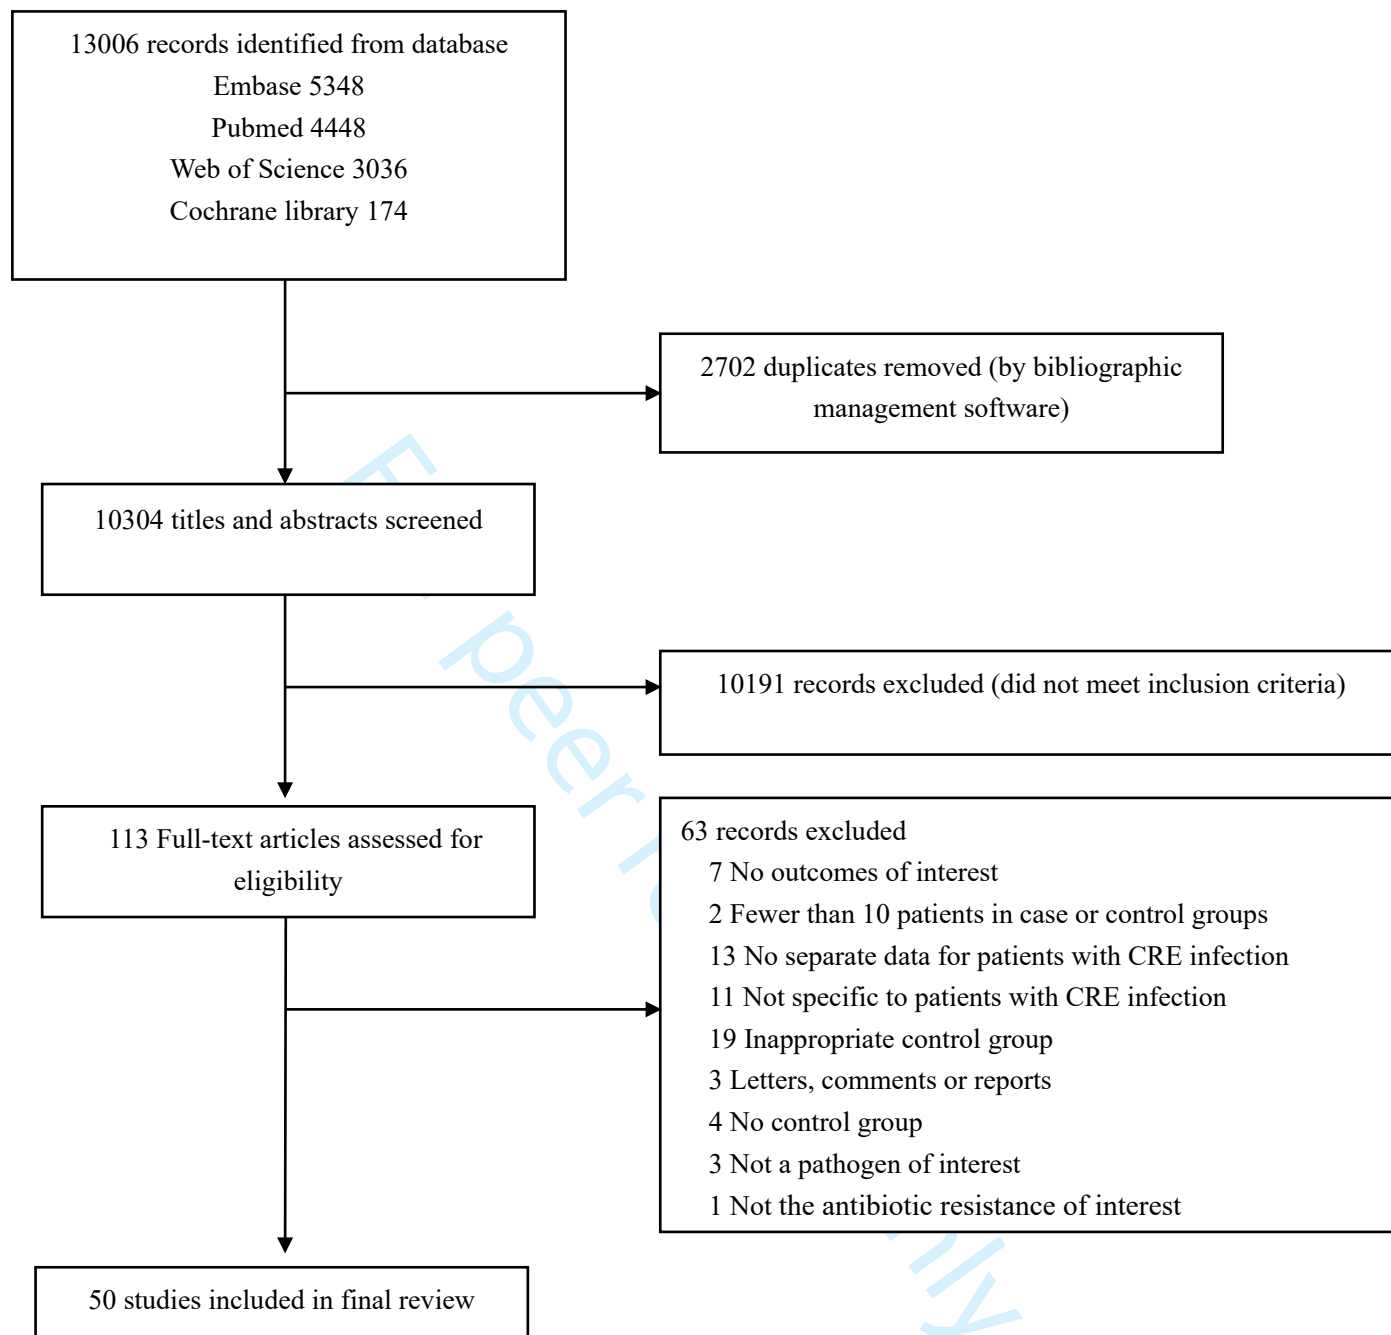

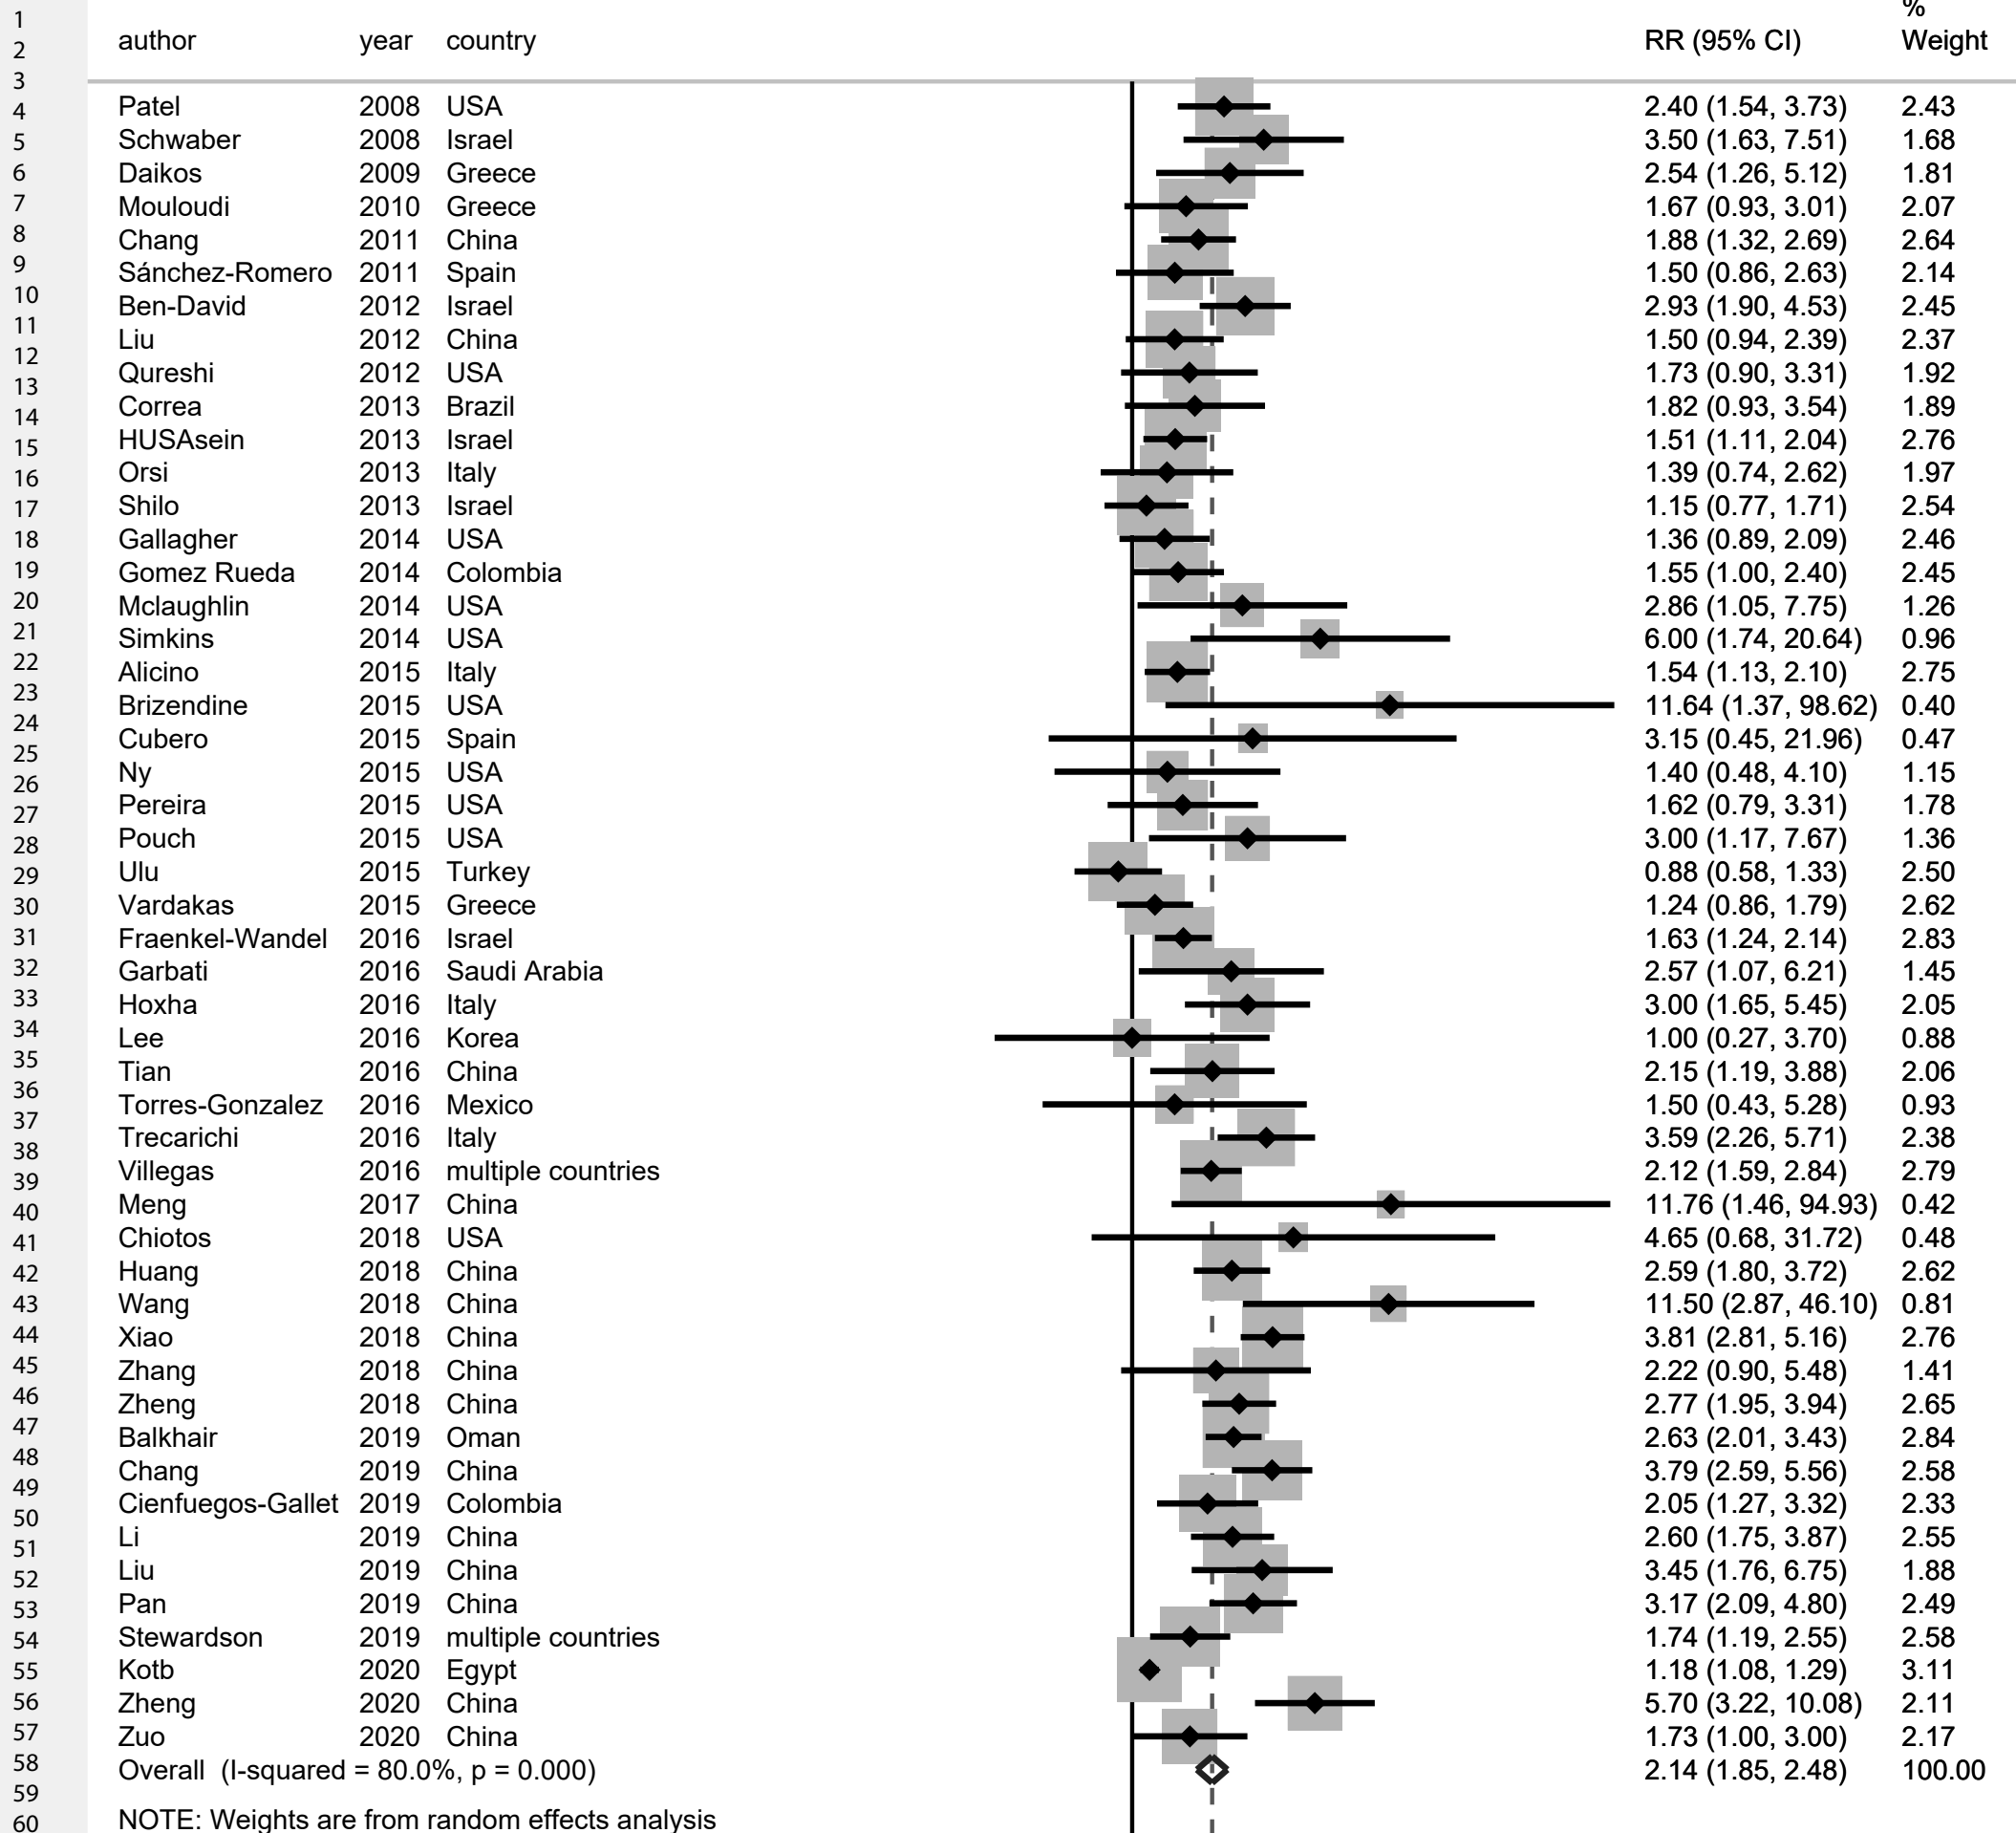

.0101

1

98.6

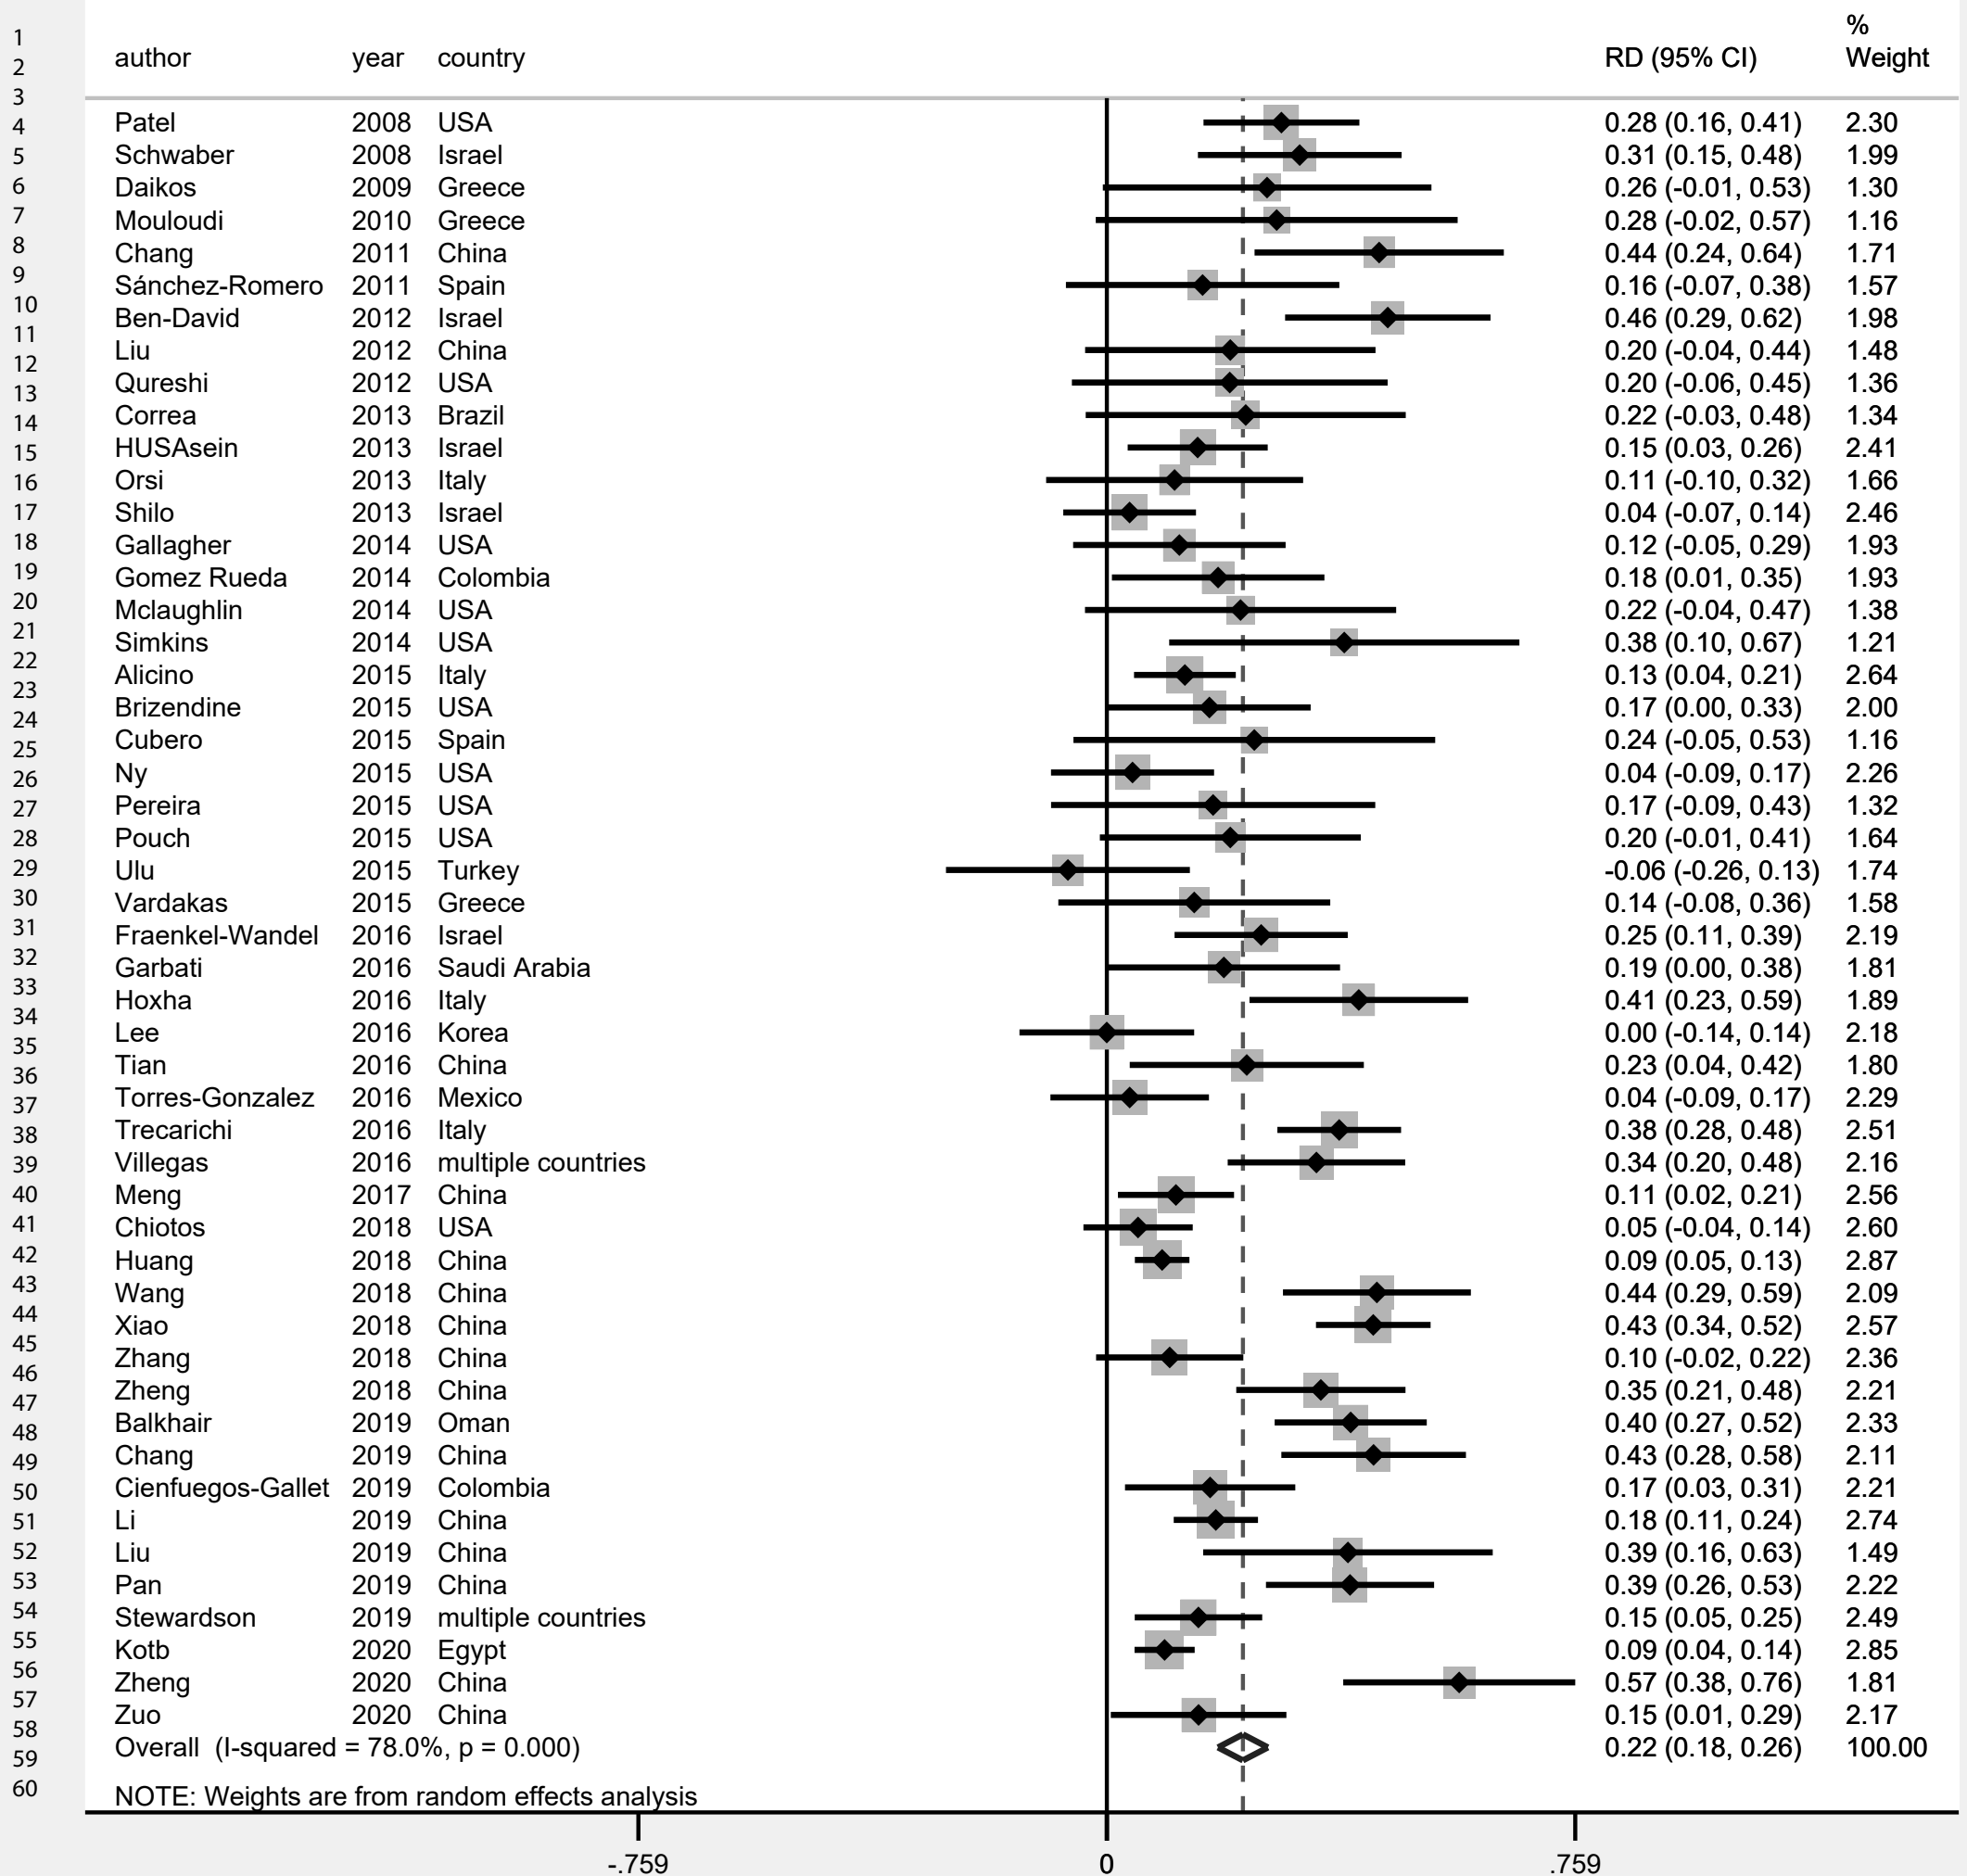

-0.759

0

0.759

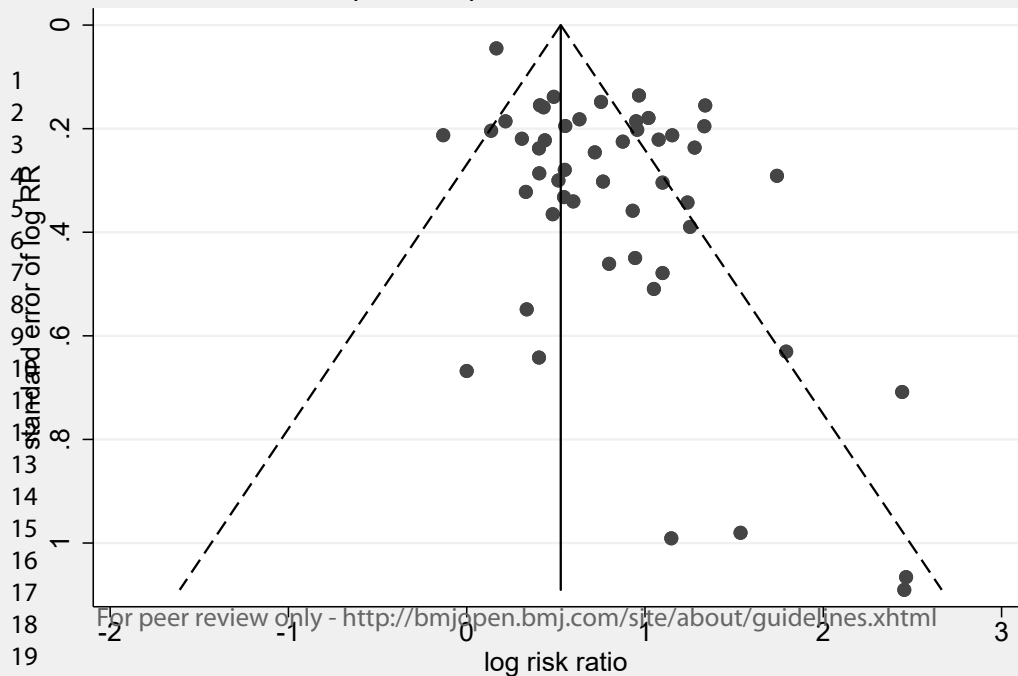

1  
2  
3  
4  
5  
6  
7  
8  
9  
10  
11  
12  
13  
14  
15  
16  
17  
18  
19  
20

### Supplementary Materials

#### Appendix 1. PRISMA Checklist

| Section/topic             | # | Checklist item                                                                                                                                                                                                                                                                                              | Reported on page # |
|---------------------------|---|-------------------------------------------------------------------------------------------------------------------------------------------------------------------------------------------------------------------------------------------------------------------------------------------------------------|--------------------|
| <b>TITLE</b>              |   |                                                                                                                                                                                                                                                                                                             |                    |
| Title                     | 1 | Identify the report as a systematic review, meta-analysis, or both.                                                                                                                                                                                                                                         | Title page         |
| <b>ABSTRACT</b>           |   |                                                                                                                                                                                                                                                                                                             |                    |
| Structured summary        | 2 | Provide a structured summary including, as applicable: background; objectives; data sources; study eligibility criteria, participants, and interventions; study appraisal and synthesis methods; results; limitations; conclusions and implications of key findings; systematic review registration number. | 2                  |
| <b>INTRODUCTION</b>       |   |                                                                                                                                                                                                                                                                                                             |                    |
| Rationale                 | 3 | Describe the rationale for the review in the context of what is already known.                                                                                                                                                                                                                              | 4-5                |
| Objectives                | 4 | Provide an explicit statement of questions being addressed with reference to participants, interventions, comparisons, outcomes, and study design (PICOS).                                                                                                                                                  | 5                  |
| <b>METHODS</b>            |   |                                                                                                                                                                                                                                                                                                             |                    |
| Protocol and registration | 5 | Indicate if a review protocol exists, if and where it can be accessed (e.g., Web address), and, if available, provide registration information including registration number.                                                                                                                               | 6                  |
| Eligibility criteria      | 6 | Specify study characteristics (e.g., PICOS, length of follow-up) and report characteristics (e.g., years considered, language, publication status) used as criteria for eligibility, giving rationale.                                                                                                      | 7                  |
| Information               | 7 | Describe all information sources (e.g., databases with dates of coverage, contact with study authors                                                                                                                                                                                                        | 6                  |

|                                    |    |                                                                                                                                                                                                                        |     |
|------------------------------------|----|------------------------------------------------------------------------------------------------------------------------------------------------------------------------------------------------------------------------|-----|
| sources                            |    | to identify additional studies) in the search and date last searched.                                                                                                                                                  |     |
| Search                             | 8  | Present full electronic search strategy for at least one database, including any limits used, such that it could be repeated.                                                                                          | 6   |
| Study selection                    | 9  | State the process for selecting studies (i.e., screening, eligibility, included in systematic review, and, if applicable, included in the meta-analysis).                                                              | 7   |
| Data collection process            | 10 | Describe method of data extraction from reports (e.g., piloted forms, independently, in duplicate) and any processes for obtaining and confirming data from investigators.                                             | 7-8 |
| Data items                         | 11 | List and define all variables for which data were sought (e.g., PICOS, funding sources) and any assumptions and simplifications made.                                                                                  | 7-8 |
| Risk of bias in individual studies | 12 | Describe methods used for assessing risk of bias of individual studies (including specification of whether this was done at the study or outcome level), and how this information is to be used in any data synthesis. | 9   |
| Summary measures                   | 13 | State the principal summary measures (e.g., risk ratio, difference in means).                                                                                                                                          | 8-9 |
| Synthesis of results               | 14 | Describe the methods of handling data and combining results of studies, if done, including measures of consistency (e.g., $I^2$ ) for each meta-analysis.                                                              | 8-9 |
| Risk of bias across studies        | 15 | Specify any assessment of risk of bias that may affect the cumulative evidence (e.g., publication bias, selective reporting within studies).                                                                           | 9   |
| Additional analyses                | 16 | Describe methods of additional analyses (e.g., sensitivity or subgroup analyses, meta-regression), if done, indicating which were pre-specified.                                                                       | 9   |
| <b>RESULTS</b>                     |    |                                                                                                                                                                                                                        |     |

|                               |    |                                                                                                                                                                                                          |                                 |
|-------------------------------|----|----------------------------------------------------------------------------------------------------------------------------------------------------------------------------------------------------------|---------------------------------|
| Study selection               | 17 | Give numbers of studies screened, assessed for eligibility, and included in the review, with reasons for exclusions at each stage, ideally with a flow diagram.                                          | 10, Figure.1                    |
| Study characteristics         | 18 | For each study, present characteristics for which data were extracted (e.g., study size, PICOS, follow-up period) and provide the citations.                                                             | 10, Table.1                     |
| Risk of bias within studies   | 19 | Present data on risk of bias of each study and, if available, any outcome level assessment (see item 12).                                                                                                | 10, Appendix.4                  |
| Results of individual studies | 20 | For all outcomes considered (benefits or harms), present, for each study: (a) simple summary data for each intervention group (b) effect estimates and confidence intervals, ideally with a forest plot. | 10, Table.1, Figure.2, Figure.3 |
| Synthesis of results          | 21 | Present results of each meta-analysis done, including confidence intervals and measures of consistency.                                                                                                  | 17, Figure.2, Figure.3          |
| Risk of bias across studies   | 22 | Present results of any assessment of risk of bias across studies (see Item 15).                                                                                                                          | 19, Figure.4                    |
| Additional analysis           | 23 | Give results of additional analyses, if done (e.g., sensitivity or subgroup analyses, meta-regression [see Item 16]).                                                                                    | 18-19                           |
| <b>DISCUSSION</b>             |    |                                                                                                                                                                                                          |                                 |
| Summary of evidence           | 24 | Summarize the main findings including the strength of evidence for each main outcome; consider their relevance to key groups (e.g., healthcare providers, users, and policy makers).                     | 24-27                           |
| Limitations                   | 25 | Discuss limitations at study and outcome level (e.g., risk of bias), and at review-level (e.g., incomplete retrieval of identified research, reporting bias).                                            | 27                              |
| Conclusions                   | 26 | Provide a general interpretation of the results in the context of other evidence, and implications for future research.                                                                                  | 27-28                           |
| <b>FUNDING</b>                |    |                                                                                                                                                                                                          |                                 |

|         |    |                                                                                                                                            |    |
|---------|----|--------------------------------------------------------------------------------------------------------------------------------------------|----|
| Funding | 27 | Describe sources of funding for the systematic review and other support (e.g., supply of data); role of funders for the systematic review. | 28 |
|---------|----|--------------------------------------------------------------------------------------------------------------------------------------------|----|

For peer review only



## Appendix 2. Search terms and search strategies

### 1. Pubmed (4448)

| Search | Query                                                                                                                                                                                                                                                                                  | Items found |
|--------|----------------------------------------------------------------------------------------------------------------------------------------------------------------------------------------------------------------------------------------------------------------------------------------|-------------|
| #1     | Search: ((enterobacteriaceae[MeSH Terms]) OR klebsiella pneumoniae[MeSH Terms]) OR escherichia coli[MeSH Terms]                                                                                                                                                                        | 399348      |
| #2     | Search: (((carbapenem resistant) OR (carbapenem resistance)) OR (carbapenem nonsusceptible)) OR (carbapenemase producing)                                                                                                                                                              | 15576       |
| #3     | Search: (((enterobacteriaceae[MeSH Terms]) OR (klebsiella pneumoniae[MeSH Terms]) OR (escherichia coli[MeSH Terms])) AND (((carbapenem resistant) OR (carbapenem resistance)) OR (carbapenem nonsusceptible)) OR (carbapenemase producing))                                            | 5776        |
| #4     | Search: (((enterobacteriaceae[MeSH Terms]) OR (klebsiella pneumoniae[MeSH Terms]) OR (escherichia coli[MeSH Terms])) AND (((carbapenem resistant) OR (carbapenem resistance)) OR (carbapenem nonsusceptible)) OR (carbapenemase producing)) Filters: Humans                            | 4761        |
| #5     | Search: (((enterobacteriaceae[MeSH Terms]) OR (klebsiella pneumoniae[MeSH Terms]) OR (escherichia coli[MeSH Terms])) AND (((carbapenem resistant) OR (carbapenem resistance)) OR (carbapenem nonsusceptible)) OR (carbapenemase producing)) Filters: Humans, from 1994 - 2020          | 4716        |
| #6     | Search: (((enterobacteriaceae[MeSH Terms]) OR (klebsiella pneumoniae[MeSH Terms]) OR (escherichia coli[MeSH Terms])) AND (((carbapenem resistant) OR (carbapenem resistance)) OR (carbapenem nonsusceptible)) OR (carbapenemase producing)) Filters: Humans, English, from 1994 - 2020 | 4448        |

### 2. Embase(5348)

| #  | searches                                                        | results |
|----|-----------------------------------------------------------------|---------|
| 1  | Enterobacteriaceae.af.                                          | 38034   |
| 2  | Klebsiella pneumoniae.af.                                       | 47767   |
| 3  | Escherichia coli.af.                                            | 425764  |
| 4  | 1 or 2 or 3                                                     | 470290  |
| 5  | carbapenem resistant.af.                                        | 7442    |
| 6  | carbapenem resistance.af.                                       | 3418    |
| 7  | carbapenem nonsusceptible.af.                                   | 139     |
| 8  | carbapenemase producing.af.                                     | 3413    |
| 9  | 5 or 6 or 7 or 8                                                | 11419   |
| 10 | 4 and 9                                                         | 8235    |
| 11 | limit 10 to (human and english language and yr="1994 -Current") | 5348    |

### 3. Web of Science(3036)

| # | searches                                                                                                                                                                                                                                               | results |
|---|--------------------------------------------------------------------------------------------------------------------------------------------------------------------------------------------------------------------------------------------------------|---------|
| 1 | TI=(Enterobacteriaceae)<br>Databases= WOS, BCI, BIOSIS, CABI, CSCD, DIIDW, INSPEC, KJD, MEDLINE, RSCI, SCIELO, ZOOREC Timespan=1994-2020<br>Search language=English                                                                                    | 6685    |
| 2 | TI=(Klebsiella pneumoniae)<br>Databases= WOS, BCI, BIOSIS, CABI, CSCD, DIIDW, INSPEC, KJD, MEDLINE, RSCI, SCIELO, ZOOREC Timespan=1994-2020<br>Search language=English                                                                                 | 10759   |
| 3 | TI=(Escherichia coli)<br>Databases= WOS, BCI, BIOSIS, CABI, CSCD, DIIDW, INSPEC, KJD, MEDLINE, RSCI, SCIELO, ZOOREC Timespan=1994-2020<br>Search language=English                                                                                      | 102497  |
| 4 | #3 OR #2 OR #1<br>Databases= WOS, BCI, BIOSIS, CABI, CSCD, DIIDW, INSPEC, KJD, MEDLINE, RSCI, SCIELO, ZOOREC Timespan=1994-2020<br>Search language=English                                                                                             | 118551  |
| 5 | TI=(carbapenem resistance OR carbapenem resistant OR carbapenem nonsusceptible OR carbapenemase producing)<br>Databases= WOS, BCI, BIOSIS, CABI, CSCD, DIIDW, INSPEC, KJD, MEDLINE, RSCI, SCIELO, ZOOREC Timespan=1994-2020<br>Search language=English | 5926    |
| 6 | #5 AND #4<br>Databases= WOS, BCI, BIOSIS, CABI, CSCD, DIIDW, INSPEC, KJD, MEDLINE, RSCI, SCIELO, ZOOREC Timespan=1994-2020<br>Search language=English                                                                                                  | 3036    |

#### 4.Cochrane library

| ID | Search                                                                                | Hits |
|----|---------------------------------------------------------------------------------------|------|
| #1 | (carbapenem) AND (Enterobacteriaceae) (Limits: Word variations have been searched)    | 137  |
| #2 | (carbapenem) AND (Klebsiella pneumoniae) (Limits: Word variations have been searched) | 71   |
| #3 | (carbapenem) AND (Escherichia coli) (Limits: Word variations have been searched)      | 67   |
| #4 | #1 OR #2 OR #3 with Cochrane Library publication date Between Jan 1994 and Sep 2020   | 174  |

### Appendix 3. List of excluded studies with reason for exclusion

| First author                   | Year | Reason for exclusion                             |
|--------------------------------|------|--------------------------------------------------|
| Adams <sup>1</sup>             | 2019 | inappropriate control group                      |
| Ahn <sup>2</sup>               | 2014 | Not specific to patients with CRE infection      |
| Akgul <sup>3</sup>             | 2016 | Not specific to patients with CRE infection      |
| Balkan <sup>4</sup>            | 2014 | inappropriate control group                      |
| Biehle <sup>5</sup>            | 2015 | not a pathogen of interest                       |
| Bleumin <sup>6</sup>           | 2012 | No separate data for patients with CRE infection |
| Bogan <sup>7</sup>             | 2014 | No separate data for patients with CRE infection |
| Chang <sup>8</sup>             | 2015 | no control group                                 |
| Cristina <sup>9</sup>          | 2016 | no control group                                 |
| Dautzenberg <sup>10</sup>      | 2015 | Not specific to patients with CRE infection      |
| de Maio Carrilho <sup>11</sup> | 2016 | no control group                                 |
| Debby <sup>12</sup>            | 2012 | Not specific to patients with CRE infection      |
| Diaz <sup>13</sup>             | 2016 | Not specific to patients with CRE infection      |
| Dizbay <sup>14</sup>           | 2014 | not a pathogen of interest                       |
| Eser <sup>15</sup>             | 2019 | Not specific to patients with CRE infection      |
| Falcone <sup>16</sup>          | 2009 | not a pathogen of interest                       |
| Fang <sup>17</sup>             | 2019 | No separate data for patients with CRE infection |
| Forde <sup>18</sup>            | 2017 | No separate data for patients with CRE infection |
| Freire <sup>19</sup>           | 2015 | inappropriate control group                      |
| Gao <sup>20</sup>              | 2019 | inappropriate control group                      |
| Gasink <sup>21</sup>           | 2009 | No separate data for patients with CRE infection |
| Gaviria <sup>22</sup>          | 2011 | Letters, comments or reports                     |
| Giacobbe <sup>23</sup>         | 2015 | Not the antibiotic resistance of interest        |
| Giannella <sup>24</sup>        | 2014 | Not specific to patients with CRE infection      |
| Girmania <sup>25</sup>         | 2015 | inappropriate control group                      |
| Girometti <sup>26</sup>        | 2014 | no outcomes of interest                          |
| Gowda <sup>27</sup>            | 2014 | no outcomes of interest                          |
| Grabowski <sup>28</sup>        | 2017 | No separate data for patients with CRE infection |
| Hauck <sup>29</sup>            | 2016 | inappropriate control group                      |
| Hu <sup>30</sup>               | 2016 | Not specific to patients with CRE infection      |
| Jiao <sup>31</sup>             | 2015 | No separate data for patients with CRE infection |
| Kang <sup>32</sup>             | 2019 | Not specific to patients with CRE infection      |
| Kofteridis <sup>33</sup>       | 2014 | No separate data for patients with CRE infection |
| Lai <sup>34</sup>              | 2013 | inappropriate control group                      |
| Lee <sup>35</sup>              | 2013 | no outcomes of interest                          |
| Lee <sup>36</sup>              | 2012 | inappropriate control group                      |
| López-González <sup>37</sup>   | 2017 | inappropriate control group                      |
| Lubbert <sup>38</sup>          | 2014 | No separate data for patients with CRE infection |
| Mantzarlis <sup>39</sup>       | 2013 | inappropriate control group                      |
| Marimuthu <sup>40</sup>        | 2013 | Letters, comments or reports                     |

|    |                                       |      |                                                  |
|----|---------------------------------------|------|--------------------------------------------------|
| 1  |                                       |      |                                                  |
| 2  |                                       |      |                                                  |
| 3  | Mazza <sup>41</sup>                   | 2017 | Fewer than 10 patients in case or control groups |
| 4  | Miller <sup>42</sup>                  | 2016 | no outcomes of interest                          |
| 5  | Mouloudi <sup>43</sup>                | 2014 | inappropriate control group                      |
| 6  | Muggeo <sup>44</sup>                  | 2017 | No separate data for patients with CRE infection |
| 7  | Nouvenne <sup>45</sup>                | 2014 | No separate data for patients with CRE infection |
| 8  | Orsi <sup>46</sup>                    | 2011 | Fewer than 10 patients in case or control groups |
| 9  | Papadimitriou-Olivgeris <sup>47</sup> | 2013 | Not specific to patients with CRE infection      |
| 10 | Patel <sup>48</sup>                   | 2015 | inappropriate control group                      |
| 11 | Porwal <sup>49</sup>                  | 2014 | Letters, comments or reports                     |
| 12 | Qureshi <sup>50</sup>                 | 2014 | inappropriate control group                      |
| 13 | Rodrigues <sup>51</sup>               | 2016 | inappropriate control group                      |
| 14 | Salsano <sup>52</sup>                 | 2016 | inappropriate control group                      |
| 15 | Segagni Lusignani <sup>53</sup>       | 2020 | No separate data for patients with CRE infection |
| 16 | Shankar <sup>54</sup>                 | 2018 | no control group                                 |
| 17 | Taminato <sup>55</sup>                | 2019 | inappropriate control group                      |
| 18 | Tamma <sup>56</sup>                   | 2017 | inappropriate control group                      |
| 19 | Tascini <sup>57</sup>                 | 2015 | Not specific to patients with CRE infection      |
| 20 | Tsereteli <sup>58</sup>               | 2018 | no outcomes of interest                          |
| 21 | Tumbarello <sup>59</sup>              | 2015 | inappropriate control group                      |
| 22 | Tumbarello <sup>60</sup>              | 2014 | inappropriate control group                      |
| 23 | Tuon <sup>61</sup>                    | 2017 | no outcomes of interest                          |
| 24 | Jamal <sup>62</sup>                   | 2016 | no outcomes of interest                          |
| 25 | Wang <sup>63</sup>                    | 2016 | No separate data for patients with CRE infection |
| 26 |                                       |      |                                                  |
| 27 |                                       |      |                                                  |
| 28 |                                       |      |                                                  |
| 29 |                                       |      |                                                  |
| 30 |                                       |      |                                                  |
| 31 |                                       |      |                                                  |
| 32 |                                       |      |                                                  |
| 33 |                                       |      |                                                  |
| 34 |                                       |      |                                                  |
| 35 |                                       |      |                                                  |
| 36 |                                       |      |                                                  |
| 37 |                                       |      |                                                  |
| 38 |                                       |      |                                                  |
| 39 |                                       |      |                                                  |
| 40 |                                       |      |                                                  |
| 41 |                                       |      |                                                  |
| 42 |                                       |      |                                                  |
| 43 |                                       |      |                                                  |
| 44 |                                       |      |                                                  |
| 45 |                                       |      |                                                  |
| 46 |                                       |      |                                                  |
| 47 |                                       |      |                                                  |
| 48 |                                       |      |                                                  |
| 49 |                                       |      |                                                  |
| 50 |                                       |      |                                                  |
| 51 |                                       |      |                                                  |
| 52 |                                       |      |                                                  |
| 53 |                                       |      |                                                  |
| 54 |                                       |      |                                                  |
| 55 |                                       |      |                                                  |
| 56 |                                       |      |                                                  |
| 57 |                                       |      |                                                  |
| 58 |                                       |      |                                                  |
| 59 |                                       |      |                                                  |
| 60 |                                       |      |                                                  |

## References of studies excluded

1. Adams DJ, Susi A, Nylund CM. Clinical characteristics, risk factors, and outcomes of patients hospitalized in the US military health system with carbapenem-resistant Enterobacteriaceae infection. *Am J Infect Control* 2020;48:644-649. doi: 10.1016/j.ajic.2019.10.006. [Epub ahead of print: 20 Nov 2019].
2. Ahn JY, Song JE, Kim MH, *et al.* Risk factors for the acquisition of carbapenem-resistant Escherichia coli at a tertiary care center in South Korea: A matched case-control study. *Am J Infect Control* 2014;42:621-5.
3. Akgul F, Bozkurt I, Sunbul M, Esen S, Leblebicioglu H. Risk factors and mortality in the Carbapenem-resistant Klebsiella pneumoniae infection: case control study. *Pathog Glob Health* 2016;110:321-325. doi: 10.1080/20477724.2016.1254976. [Epub ahead of print: 01 Dec 2016].
4. Balkan II, Aygun G, Aydin S, Mutcali SI, Kara Z, Kuskucu M, *et al.* Blood stream infections due to OXA-48-like carbapenemase-producing Enterobacteriaceae: Treatment and survival. *Int J Infect Dis* 2014;26:51-6. doi: 10.1016/j.ijid.2014.05.012. [Epub ahead of print: 03 Jul 2014].
5. Biehle LR, Cottreau JM, Thompson DJ, Filipek RL, O'Donnell JN, Lasco TM, *et al.* Outcomes and risk factors for mortality among patients treated with carbapenems for klebsiella spp. Bacteremia. *PLoS One* 2015;10:e0143845.
6. Bleumin D, Cohen MJ, Moranne O, Esnault VLM, Benenson S, Paltiel O, *et al.* Carbapenem-resistant Klebsiella pneumoniae is associated with poor outcome in hemodialysis patients. *J Infect* 2012;65:318-25. doi: 10.1016/j.jinf.2012.06.005. [Epub ahead of print: 18 Jun 2012].
7. Bogan C, Kaye KS, Chopra T, Hayakawa K, Pogue JM, Lephart PR, *et al.* Outcomes of carbapenem-resistant Enterobacteriaceae isolation: Matched analysis. *Am J Infect Control* 2014;42:612-20.
8. Chang YY, Chuang YC, Siu LK, Wu TL, Lin JC, Lu PL, *et al.* Clinical features of patients with carbapenem nonsusceptible Klebsiella pneumoniae and Escherichia coli in intensive care units: a nationwide multicenter study in Taiwan. *J Microbiol Immunol Infect* 2015;48:219-25. doi: 10.1016/j.jmii.2014.05.010. [Epub ahead of print: 26 Jul 2014].
9. Cristina ML, Sartini M, Ottria G, Schinca E, Cenderello N, Crisalli MP, *et al.* Epidemiology and biomolecular characterization of carbapenem-resistant klebsiella pneumoniae in an Italian hospital. *J Prev Med Hyg* 2016;57:E149-E156.
10. Dautzenberg MJ, Wekesa AN, Gniadkowski M, Antoniadou A, Giamarellou H, Petrikos GL, *et al.* The Association between Colonization with Carbapenemase-Producing Enterobacteriaceae and Overall ICU Mortality: An Observational Cohort Study. *Crit Care Med* 2015;43:1170-7.
11. de Maio Carrilho CM, de Oliveira LM, Gaudereto J, Perozin JS, Urbano MR, Camargo CH, *et al.* A prospective study of treatment of carbapenem-resistant Enterobacteriaceae infections and risk factors associated with outcome. *BMC Infect Dis* 2016;16:629.
12. Debby BD, Ganor O, Yasmin M, David L, Nathan K, Ilana T, *et al.* Epidemiology of carbapenem resistant Klebsiella pneumoniae colonization in an intensive care unit. *Eur J*

- 1  
2  
3  
4  
5  
6  
7  
8  
9  
10  
11  
12  
13  
14  
15  
16  
17  
18  
19  
20  
21  
22  
23  
24  
25  
26  
27  
28  
29  
30  
31  
32  
33  
34  
35  
36  
37  
38  
39  
40  
41  
42  
43  
44  
45  
46  
47  
48  
49  
50  
51  
52  
53  
54  
55  
56  
57  
58  
59  
60
- Clin Microbiol Infect Dis* 2012;31:1811-7. doi: 10.1007/s10096-011-1506-5. [Epub ahead of print: 14 Jan 2012].
13. Diaz A, Ortiz DC, Trujillo M, Garces C, Jaimes F, Restrepo AV. Clinical Characteristics of Carbapenem-resistant *Klebsiella pneumoniae* Infections in Ill and Colonized Children in Colombia. *Pediatr Infect Dis J* 2016;35:237-41.
14. Dizbay M, Tunccan OG, Karasahin O, Aktas F. Emergence of carbapenem-resistant *Klebsiella* spp. infections in a Turkish university hospital: epidemiology and risk factors. *J Infect Dev Ctries* 2014;8:44-9.
15. Eser F, Yilmaz GR, Guner R, Hasanoglu I, Urkmez Korkmaz FY, Acikgoz ZC, et al. Risk factors for rectal colonization of carbapenem-resistant Enterobacteriaceae in a tertiary care hospital: a case-control study from Turkey. *Turk J Med Sci* 2019;49:341-346.
16. Falcone M, Mezzatesta ML, Perilli M, Forcella C, Venditti M. Infections with VIM-1 metallo- $\beta$ -lactamase-producing enterobacter cloacae and their correlation with clinical outcome. *J Clin Microbiol* 2009;47:3514-9. doi: 10.1128/JCM.01193-09. [Epub ahead of print: 09 Sep 2009].
17. Fang L, Lu X, Xu H, Ma X, Chen Y, Liu Y, et al. Epidemiology and risk factors for carbapenem-resistant Enterobacteriaceae colonisation and infections: case-controlled study from an academic medical center in a southern area of China. *Pathog Dis* 2019;77:ftz034.
18. Forde C, Stierman B, Ramon-Pardo P, Dos Santos T, Singh N. Carbapenem-resistant *Klebsiella pneumoniae* in Barbados: Driving change in practice at the national level. *PLoS One* 2017;12:e0176779.
19. Freire MP, Pierrotti LC, Filho HHC, Ibrahim KY, Magri ASGK, Bonazzi PR, et al. Infection with *Klebsiella pneumoniae* carbapenemase (KPC)-producing *Klebsiella pneumoniae* in cancer patients. *Eur J Clin Microbiol Infect Dis* 2015;34:277-86. doi: 10.1007/s10096-014-2233-5. [Epub ahead of print: 30 Aug 2014].
20. Gao B, Li X, Yang F, Chen W, Zhao Y, Bai G, et al. Molecular Epidemiology and Risk Factors of Ventilator-Associated Pneumonia Infection Caused by Carbapenem-Resistant Enterobacteriaceae. *Front Pharmacol* 2019;10:262.
21. Gasink LB, Edelstein PH, Lautenbach E, Synnestvedt M, Fishman NO. Risk Factors and Clinical Impact of *Klebsiella pneumoniae* Carbapenemase-Producing *K. pneumoniae*. *Infect Control Hosp Epidemiol* 2009;30:1180-5.
22. Centers for Disease Control and Prevention (CDC). Carbapenem-resistant *Klebsiella pneumoniae* associated with a long-term--care facility --- West Virginia, 2009-2011. *MMWR Morb Mortal Wkly Rep* 2011;60:1418-20.
23. Giacobbe DR, Del Bono V, Trecarichi EM, De Rosa FG, Giannella M, Bassetti M, et al. Risk factors for bloodstream infections due to colistin-resistant KPC-producing *Klebsiella pneumoniae*: results from a multicenter case-control-control study. *Clin Microbiol Infect* 2015;21:1106.e1-8. doi: 10.1016/j.cmi.2015.08.001. [Epub ahead of print: 14 Aug 2015].
24. Giannella M, Morelli MC, Cristini F, Ercolani G, Cescon M, Bartoletti M, et al. Carbapenem-resistant *Klebsiella pneumoniae* colonization at liver transplantation: A management challenge. *Liver Transpl* 2014;20:631-3.
25. Girmenia C, Rossolini GM, Picocchi A, Bertaina A, Pisapia G, Pastore D, et al. Infections by carbapenem-resistant *Klebsiella pneumoniae* in SCT recipients: a



- 1  
2  
3 nationwide retrospective survey from Italy. *Bone Marrow Transplant* 2015;50:282-8. doi:  
4 10.1038/bmt.2014.231. [Epub ahead of print: 13 Oct 2014].  
5  
6 26. Girometti N, Lewis RE, Giannella M, Ambretti S, Viale P. Klebsiella pneumoniae  
7 Bloodstream Infection: Epidemiology and Impact of Inappropriate Empirical Therapy.  
8 *Medicine (Baltimore)* 2014;93:298-309.  
9  
10 27. Gowda LK, Marie MAM. Epidemiology of carbapenem-resistant and  
11 noncarbapenem-resistant enterobacteriaceae and issues related to susceptibility testing,  
12 treatment options, and clinical outcome. *Rev Medi Microbiol* 2014;25:53-65.  
13  
14 28. Grabowski ME, Kang H, Wells KM, Sifri CD, Mathers AJ, Lobo JM. Provider Role in  
15 Transmission of Carbapenem-Resistant Enterobacteriaceae. *Infect Control Hosp*  
16 *Epidemiol* 2017;38:1329-1334. doi: 10.1017/ice.2017.216. [Epub ahead of print: 24 Oct  
17 2017].  
18  
19 29. Hauck C, Cober E, Richter SS, Perez F, Salata RA, Kalayjian RC, et al. Spectrum of  
20 excess mortality due to carbapenem-resistant Klebsiella pneumoniae infections. *Clin*  
21 *Microbiol Infect* 2016;22:513-9. doi: 10.1016/j.cmi.2016.01.023. [Epub ahead of print: 03  
22 Feb 2016].  
23  
24 30. Hu Y, Ping Y, Li L, Xu H, Yan X, Dai H. A retrospective study of risk factors for  
25 carbapenem-resistant Klebsiella pneumoniae acquisition among ICU patients. *J Infect*  
26 *Dev Ctries* 2016;10:208-13.  
27  
28 31. Jiao Y, Qin Y, Liu J, Li Q, Dong Y, Shang Y, et al. Risk factors for carbapenem-resistant  
29 Klebsiella pneumoniae infection/colonization and predictors of mortality: a retrospective  
30 study. *Pathog Glob Health* 2015;109:68-74. doi: 10.1179/2047773215Y.0000000004.  
31 [Epub ahead of print: 24 Feb 2015].  
32  
33 32. Kang JS, Yi J, Ko MK, Lee SO, Lee JE, Kim K-H. Prevalence and Risk Factors of  
34 Carbapenem-resistant Enterobacteriaceae Acquisition in an Emergency Intensive Care  
35 Unit in a Tertiary Hospital in Korea: a Case-Control Study. *J Korean Med Sci*  
36 2019;34:e140.  
37  
38 33. Kofteridis DP, Valachis A, Dimopoulou D, Maraki S, Christidou A, Mantadakis E, et al.  
39 Risk factors for carbapenem-resistant Klebsiella pneumoniae infection/colonization: a  
40 case-case-control study. *J Infect Chemother* 2014;20:293-7. doi:  
41 10.1016/j.jiac.2013.11.007. [Epub ahead of print: 03 Apr 2014]  
42  
43 34. Lai CC, Wu UI, Wang JT, Chang SC. Prevalence of carbapenemase-producing  
44 Enterobacteriaceae and its impact on clinical outcomes at a teaching hospital in Taiwan. *J*  
45 *Formos Med Assoc* 2013;112:492-6. doi: 10.1016/j.jfma.2012.09.021. [Epub ahead of  
46 print: 22 Nov 2012].  
47  
48 35. Lee GC, Lawson KA, Burgess DS. Clinical epidemiology of carbapenem- resistant  
49 enterobacteriaceae in community hospitals: A case-case-control study. *Ann Pharmacother*  
50 2013;47:1115-21.  
51  
52 36. Lee NY, Wu JJ, Lin SH, Ko WC, Tsai LH, Yan JJ. Characterization of  
53 carbapenem-nonsusceptible Klebsiella pneumoniae bloodstream isolates at a Taiwanese  
54 hospital: clinical impacts of lowered breakpoints for carbapenems. *Eur J Clin Microbiol*  
55 *Infect Dis* 2012;31:1941-50. doi: 10.1007/s10096-011-1525-2. [Epub ahead of print: 18  
56 Jan 2012].  
57  
58  
59  
60

- 1  
2  
3  
4  
5  
6  
7  
8  
9  
10  
11  
12  
13  
14  
15  
16  
17  
18  
19  
20  
21  
22  
23  
24  
25  
26  
27  
28  
29  
30  
31  
32  
33  
34  
35  
36  
37  
38  
39  
40  
41  
42  
43  
44  
45  
46  
47  
48  
49  
50  
51  
52  
53  
54  
55  
56  
57  
58  
59  
60
37. Lopez-Gonzalez L, Candel FJ, Vinuela-Prieto JM, Gonzalez-Del Castillo J, Garcia AB, Pena I, et al. Useful independent factors for distinguish infection and colonization in patients with urinary carbapenemase-producing Enterobacteriaceae isolation. *Rev Esp Quimioter* 2017;30:450-457. [Epub ahead of print: 07 Nov 2017].
  38. Lubbert C, Becker-Rux D, Rodloff AC, Laudi S, Busch T, Bartels M, et al. Colonization of liver transplant recipients with KPC-producing *Klebsiella pneumoniae* is associated with high infection rates and excess mortality: a case-control analysis. *Infection* 2014;42:309-16. doi: 10.1007/s15010-013-0547-3. [Epub ahead of print: 12 Nov 2013].
  39. Mantzaris K, Makris D, Manoulakas E, Karvouniaris M, Zakyntinos E. Risk factors for the first episode of *Klebsiella pneumoniae* resistant to carbapenems infection in critically ill patients: a prospective study. *Biomed Res Int* 2013;2013:850547. doi: 10.1155/2013/850547. [Epub ahead of print: 18 Dec 2013].
  40. Marimuthu K, Ng TM, Teng C, Lim TP, Koh TH, Tan TY, et al. Risk factors and treatment outcome of ertapenem non-susceptible enterobacteriaceae bacteraemia. *J Infect* 2013;66:294-6. doi: 10.1016/j.jinf.2012.11.010. [Epub ahead of print: 28 Nov 2012].
  41. Mazza E, Prosperi M, Panzeri MF, Limuti R, Nichelatti M, De Gasperi A. Carbapenem-Resistant *Klebsiella Pneumoniae* Infections Early After Liver Transplantation: A Single-Center Experience. *Transplant Proc* 2017;49:677-681.
  42. Miller BM, Johnson SW. Demographic and infection characteristics of patients with carbapenem-resistant Enterobacteriaceae in a community hospital: Development of a bedside clinical score for risk assessment. *Am J Infect Control* 2016;44:134-7. doi: 10.1016/j.ajic.2015.09.006. [Epub ahead of print: 20 Oct 2015].
  43. Mouloudi E, Massa E, Papadopoulos S, Iosifidis E, Roilides I, Theodoridou T, et al. Bloodstream infections caused by carbapenemase-producing *Klebsiella pneumoniae* among intensive care unit patients after orthotopic liver transplantation: risk factors for infection and impact of resistance on outcomes. *Transplant Proc* 2014;46:3216-8.
  44. Muggeo A, Guillard T, Barbe C, Thierry A, Bajolet O, Vernet-Garnier V, et al. Factors associated with carriage of carbapenem-non-susceptible Enterobacteriaceae in North-Eastern France and outcomes of infected patients. *J Antimicrob Chemother* 2017;72:1496-1501.
  45. Nouvenne A, Ticinesi A, Lauretani F, Maggio M, Lippi G, Guida L, et al. Comorbidities and disease severity as risk factors for carbapenem-resistant *Klebsiella pneumoniae* colonization: report of an experience in an internal medicine unit. *PLoS One* 2014;9:e110001.
  46. Orsi GB, Garcia-Fernandez A, Giordano A. Risk factors and clinical significance of ertapenem-resistant *Klebsiella pneumoniae* in hospitalised patients. *J Hosp Infect* 2011;78:54-8. doi: 10.1016/j.jhin.2011.01.014. [Epub ahead of print: 30 Mar 2011].
  47. Papadimitriou-Olivgeris M, Marangos M, Fligou F, Christofidou M, Sklavou C, Vamvakopoulou S, et al. KPC-producing *Klebsiella pneumoniae* enteric colonization acquired during intensive care unit stay: the significance of risk factors for its development and its impact on mortality. *Diagn Microbiol Infect Dis* 2013;77:169-73. doi: 10.1016/j.diagmicrobio.2013.06.007. [Epub ahead of print: 23 Jul 2013].



- 1  
2  
3  
4 48. Patel TS, Nagel JL. Clinical outcomes of Enterobacteriaceae infections stratified by  
5 carbapenem MICs. *J Clin Microbiol* 2015;53:201-5. doi: 10.1128/JCM.03057-14. [Epub  
6 ahead of print: 05 Nov 2014].
- 7  
8 49. Porwal R, Gopalakrishnan R, Rajesh NJ, Ramasubramanian V. Carbapenem resistant  
9 Gram-negative bacteremia in an Indian intensive care unit: A review of the clinical profile  
10 and treatment outcome of 50 patients. *Indian J Crit Care Med* 2014;18:750-3.
- 11  
12 50. Qureshi ZA, Syed A, Clarke LG, Doi Y, Shields RK. Epidemiology and clinical  
13 outcomes of patients with carbapenem-resistant *Klebsiella pneumoniae* bacteriuria.  
14 *Antimicrob Agents Chemother* 2014;58:3100-4. doi: 10.1128/AAC.02445-13. [Epub  
15 ahead of print: 17 Mar 2014].
- 16  
17 51. Rodrigues Dos Santos BG, Amaral ES, Jr., Fernandes PF, Oliveira CM, Rodrigues JL,  
18 Perdigao Neto LV, et al. Urinary Tract Infections and Surgical Site Infections due to  
19 Carbapenem-Resistant Enterobacteriaceae in Renal Transplant. *Transplant Proc*  
20 2016;48:2050-5.
- 21  
22 52. Salsano A, Giacobbe DR, Sportelli E, Olivieri GM, Brega C, Di Biase C, et al. Risk  
23 factors for infections due to carbapenem-resistant *Klebsiella pneumoniae* after open heart  
24 surgery. *Interact Cardiovasc Thorac Surg* 2016;23:762-768. doi: 10.1093/icvts/ivw228.  
25 [Epub ahead of print: 01 Jul 2016].
- 26  
27 53. Segagni Lusignani L, Presterl E, Zatorska B, Van Den Nest M, Diab-Elschahawi M.  
28 Infection control and risk factors for acquisition of carbapenemase-producing  
29 enterobacteriaceae. A 5 year (2011-2016) case-control study. *Antimicrob Resist Infect*  
30 *Control* 2020;9:18.
- 31  
32 54. Shankar C, Kumar M, Baskaran A, Paul MM, Ponmudi N, Santhanam S, et al. Molecular  
33 characterisation for clonality and transmission dynamics of an outbreak of *Klebsiella*  
34 *pneumoniae* amongst neonates in a tertiary care centre in South India. *Indian J Med*  
35 *Microbiol* 2018;36:54-60.
- 36  
37 55. Taminato M, Fram D, Pereira RRF, Sesso R, Belasco AGS, Pignatari AC, et al. Infection  
38 related to *Klebsiella pneumoniae* producing carbapenemase in renal transplant patients.  
39 *Rev Bras Enferm* 2019;72:760-766.
- 40  
41 56. Tamma PD, Goodman KE, Harris AD, Tekle T, Roberts A, Taiwo A, et al. Comparing  
42 the Outcomes of Patients With Carbapenemase-Producing and  
43 Non-Carbapenemase-Producing Carbapenem-Resistant Enterobacteriaceae Bacteremia.  
44 *Clin Infect Dis* 2017;64:257-264. doi: 10.1093/cid/ciw741. [Epub ahead of print: 09 Nov  
45 2016].
- 46  
47 57. Tascini C, Lipsky BA, Iacopi E, Ripoli A, Sbrana F, Coppelli A, et al. KPC-producing  
48 *Klebsiella pneumoniae* rectal colonization is a risk factor for mortality in patients with  
49 diabetic foot infections. *Clin Microbiol Infect* 2015;21:790.e1-3. doi:  
50 10.1016/j.cmi.2015.04.010. [Epub ahead of print: 22 Apr 2015].
- 51  
52 58. Tsereteli M, Sidamonidze K, Tsereteli D, Malania L, Vashakidze E. EPIDEMIOLOGY  
53 OF CARBAPENEM-RESISTANT *KLEBSIELLA PNEUMONIAE* IN INTENSIVE  
54 CARE UNITS OF MULTIPROFILE HOSPITALS IN TBILISI, GEORGIA. *Georgian*  
55 *Med News* 2018;(280-281):164-168.
- 56  
57 59. Tumbarello M, Trearichi EM, De Rosa FG, Giannella M, Giacobbe DR, Bassetti M, et al.  
58 Infections caused by KPC-producing *Klebsiella pneumoniae*: differences in therapy and  
59  
60

- 1  
2  
3 mortality in a multicentre study. *J Antimicrob Chemother* 2015;70:2133-43. doi:  
4 10.1093/jac/dkv086. [Epub ahead of print: 21 Apr 2015].  
5  
6 60. Tumbarello M, Trecarichi EM, Tumietto F, Del Bono V, De Rosa FG, Bassetti M, et al.  
7 Predictive models for identification of hospitalized patients harboring KPC-producing  
8 *Klebsiella pneumoniae*. *Antimicrob Agents Chemother* 2014;58:3514-20. doi:  
9 10.1128/AAC.02373-13. [Epub ahead of print: 14 Apr 2014].  
10  
11 61. Tuon FF, Graf ME, Merlini A, Rocha JL, Stallbaum S, Arend LN, et al. Risk factors for  
12 mortality in patients with ventilator-associated pneumonia caused by  
13 carbapenem-resistant Enterobacteriaceae. *Braz J Infect Dis* 2017;21:1-6. doi:  
14 10.1016/j.bjid.2016.09.008. [Epub ahead of print: 04 Nov 2014].  
15  
16 62. Jamal WY, Albert MJ, Rotimi VO. High Prevalence of New Delhi  
17 Metallo-beta-Lactamase-1 (NDM-1) Producers among Carbapenem-Resistant  
18 Enterobacteriaceae in Kuwait. *PLoS One* 2016;11:e0152638.  
19  
20 63. Wang Q, Zhang Y, Yao X, Xian H, Liu Y, Li H, et al. Risk factors and clinical outcomes  
21 for carbapenem-resistant Enterobacteriaceae nosocomial infections. *Eur J Clin Microbiol*  
22 *Infect Dis* 2016;35:1679-89. doi: 10.1007/s10096-016-2710-0. [Epub ahead of print: 11  
23 Jul 2016].  
24  
25  
26  
27  
28  
29  
30  
31  
32  
33  
34  
35  
36  
37  
38  
39  
40  
41  
42  
43  
44  
45  
46  
47  
48  
49  
50  
51  
52  
53  
54  
55  
56  
57  
58  
59  
60

## Appendix 4. Risk of bias assessed with the Newcastle-Ottawa Assessment Scale.

### NEWCASTLE - OTTAWA QUALITY ASSESSMENT SCALE COHORT STUDIES

Note: A study can be awarded a maximum of one star for each numbered item within the Selection and Outcome categories. A maximum of two stars can be given for Comparability. In this version of NOS, we define the exposure as carbapenem resistance and the outcome as death in hospital and the target population is patients infected with *Enterobacteriaceae*.

#### **Selection:** (Maximum 4 stars)

##### 1) Representativeness of the exposed cohort

- a) truly representative of the average carbapenem resistance in patients infected with *Enterobacteriaceae*. \*
- b) somewhat representative of the average carbapenem resistance in patients infected with *Enterobacteriaceae* \*
- c) selected group of users (e.g. organ transplant recipients, onco-hematological patients)
- d) no description of the derivation of the cohort

##### 2) Selection of the non exposed cohort

- a) drawn from the same community as the exposed cohort \*
- b) drawn from a different source
- c) no description of the derivation of the non exposed cohort

##### 3) Ascertainment of exposure

- a) secure record (e.g. medical records) \*
- b) structured interview \*
- c) written self report
- d) no description

##### 4) Demonstration that outcome of interest was not present at start of study

1  
2  
3  
4  
5 a) yes ✱

6 b) no  
7

8 **Comparability:** (Maximum 2 stars)  
9

10 1) Comparability of cohorts on the basis of the design or analysis

11 a) study controls for age ✱

12 b) study controls for comorbidity ✱  
13  
14

15 **Outcome:** (Maximum 3 stars)  
16

17 1) Assessment of outcome

18 a) independent blind assessment ✱

19 b) record linkage ✱

20 c) self report

21 d) no description  
22  
23

24 2) Was follow-up long enough for outcomes to occur

25 a) yes (adequate if >14 days) ✱

26 b) no  
27  
28

29 3) Adequacy of follow up of cohorts

30 a) complete follow up - all subjects accounted for ✱

31 b) subjects lost to follow up unlikely to introduce bias - small number lost - > 80 % follow up, or description provided of those lost ✱

32 c) follow up rate < 80% and no description of those lost

33 d) no statement  
34  
35  
36  
37  
38  
39  
40  
41  
42  
43  
44  
45  
46

1  
2  
3  
4  
5  
6  
7  
8  
9  
10  
11  
12  
13  
14  
15  
16  
17  
18  
19  
20  
21  
22  
23  
24  
25  
26  
27  
28  
29  
30  
31  
32  
33  
34  
35  
36  
37  
38  
39  
40  
41  
42  
43  
44  
45  
46

| First Author             | Year | selection(1) | selection(2) | selection(3) | selection(4) | comparability(1) | outcome(1) | outcome(2) | outcome(3) | Total score | Risk of bias |
|--------------------------|------|--------------|--------------|--------------|--------------|------------------|------------|------------|------------|-------------|--------------|
| Alicino,C                | 2015 | 1            | 1            | 1            | 1            | 0                | 1          | 1          | 1          | 7           | Low          |
| Balkhair, A.             | 2019 | 1            | 1            | 1            | 1            | 0                | 1          | 1          | 1          | 7           | Low          |
| Ben-David, D.            | 2012 | 1            | 1            | 1            | 1            | 1                | 1          | 1          | 1          | 8           | Low          |
| Brizendine, K. D         | 2015 | 0            | 1            | 1            | 1            | 1                | 1          | 1          | 1          | 7           | Low          |
| Chang, H                 | 2019 | 1            | 1            | 1            | 1            | 0                | 1          | 1          | 1          | 7           | Low          |
| Chang, H. J              | 2011 | 1            | 1            | 1            | 1            | 1                | 1          | 1          | 1          | 8           | Low          |
| Chiotos, K.              | 2018 | 0            | 1            | 1            | 1            | 1                | 1          | 1          | 1          | 7           | Low          |
| Cienfuegos-Gallet, A. V. | 2019 | 1            | 1            | 1            | 1            | 1                | 1          | 1          | 1          | 8           | Low          |
| Correa, L.               | 2013 | 1            | 1            | 1            | 1            | 1                | 1          | 1          | 1          | 8           | Low          |
| Cubero,M                 | 2015 | 1            | 1            | 1            | 1            | 0                | 1          | 1          | 1          | 7           | Low          |
| Daikos                   | 2009 | 1            | 1            | 1            | 1            | 0                | 1          | 0          | 1          | 6           | Moderate     |
| Fraenkel-Wandel, Y.      | 2016 | 1            | 1            | 1            | 1            | 1                | 1          | 1          | 1          | 8           | Low          |
| Gallagher                | 2014 | 1            | 1            | 1            | 1            | 0                | 1          | 1          | 1          | 7           | Low          |
| Garbati, M. A.           | 2016 | 1            | 1            | 1            | 1            | 0                | 1          | 1          | 1          | 7           | Low          |
| Gomez Rueda, V.          | 2014 | 1            | 1            | 1            | 1            | 0                | 1          | 1          | 1          | 7           | Low          |
| Hoxha, A.                | 2016 | 1            | 1            | 1            | 1            | 1                | 1          | 1          | 0          | 7           | Low          |
| Huang, W.                | 2018 | 1            | 1            | 1            | 1            | 2                | 1          | 1          | 1          | 9           | Low          |
| Hussein, K.              | 2013 | 1            | 1            | 1            | 1            | 1                | 1          | 1          | 1          | 8           | Low          |
| Kotb, Sara               | 2020 | 1            | 1            | 1            | 1            | 0                | 1          | 1          | 1          | 7           | Low          |
| Lee, H. J.               | 2016 | 1            | 1            | 1            | 1            | 1                | 1          | 1          | 1          | 8           | Low          |
| Li, Yi                   | 2019 | 0            | 1            | 1            | 1            | 1                | 1          | 1          | 1          | 7           | Low          |
| Liu, Jianling            | 2019 | 0            | 1            | 1            | 1            | 1                | 1          | 1          | 1          | 7           | Low          |

|    |                           |      |   |   |   |   |   |   |   |   |   |   |          |
|----|---------------------------|------|---|---|---|---|---|---|---|---|---|---|----------|
| 1  |                           |      |   |   |   |   |   |   |   |   |   |   |          |
| 2  |                           |      |   |   |   |   |   |   |   |   |   |   |          |
| 3  |                           |      |   |   |   |   |   |   |   |   |   |   |          |
| 4  |                           |      |   |   |   |   |   |   |   |   |   |   |          |
| 5  | Liu, S. W.                | 2012 | 1 | 1 | 1 | 1 | 1 | 1 | 1 | 1 | 1 | 8 | Low      |
| 6  | Mclaughlin                | 2014 | 1 | 1 | 1 | 1 | 1 | 1 | 1 | 1 | 1 | 8 | Low      |
| 7  | Meng, Xiujuan             | 2017 | 1 | 1 | 1 | 1 | 1 | 1 | 1 | 1 | 1 | 8 | Low      |
| 8  | Mouloudi, Eleni           | 2010 | 0 | 1 | 1 | 1 | 1 | 1 | 1 | 1 | 1 | 7 | Low      |
| 9  | Ny, P.                    | 2015 | 1 | 1 | 1 | 1 | 1 | 1 | 1 | 1 | 1 | 8 | Low      |
| 10 | Orsi,G.B.                 | 2013 | 1 | 1 | 1 | 1 | 1 | 1 | 1 | 1 | 1 | 8 | Low      |
| 11 | Pan, H.                   | 2019 | 1 | 1 | 1 | 1 | 1 | 1 | 1 | 1 | 1 | 8 | Low      |
| 12 | Patel                     | 2008 | 1 | 1 | 1 | 1 | 1 | 1 | 1 | 1 | 1 | 8 | Low      |
| 13 | Pereira, M. R.            | 2015 | 0 | 1 | 1 | 1 | 1 | 1 | 1 | 1 | 1 | 7 | Low      |
| 14 | Pouch, S. M.              | 2015 | 0 | 1 | 1 | 1 | 1 | 1 | 1 | 1 | 1 | 7 | Low      |
| 15 | Qureshi                   | 2012 | 1 | 1 | 1 | 1 | 0 | 1 | 1 | 1 | 1 | 7 | Low      |
| 16 | Sánchez-Romero            | 2011 | 1 | 1 | 1 | 1 | 0 | 1 | 0 | 1 | 1 | 6 | Moderate |
| 17 | Schwaber                  | 2008 | 1 | 1 | 1 | 1 | 0 | 1 | 1 | 1 | 1 | 7 | Low      |
| 18 | Shilo, S.                 | 2013 | 1 | 1 | 1 | 1 | 1 | 1 | 1 | 1 | 1 | 8 | Low      |
| 19 | Simkins, J.               | 2014 | 0 | 1 | 1 | 1 | 1 | 1 | 1 | 1 | 1 | 7 | Low      |
| 20 | Stewardson                | 2019 | 1 | 1 | 1 | 1 | 2 | 1 | 1 | 1 | 1 | 9 | Low      |
| 21 | Tian, Lijun               | 2016 | 1 | 1 | 1 | 1 | 1 | 1 | 1 | 1 | 1 | 8 | Low      |
| 22 | Torres-Gonzalez, P.       | 2016 | 1 | 1 | 1 | 1 | 0 | 1 | 1 | 1 | 1 | 7 | Low      |
| 23 | Trecarichi, Enrico Maria  | 2016 | 0 | 1 | 1 | 1 | 0 | 1 | 1 | 1 | 1 | 6 | Moderate |
| 24 | Ulu, Aslihan Candevir     | 2015 | 0 | 1 | 1 | 1 | 1 | 1 | 1 | 1 | 1 | 7 | Low      |
| 25 | Vardakas, Konstantinos Z. | 2015 | 0 | 1 | 1 | 1 | 1 | 1 | 1 | 1 | 1 | 7 | Low      |
| 26 | Villegas                  | 2016 | 1 | 1 | 1 | 1 | 1 | 1 | 1 | 1 | 1 | 8 | Low      |
| 27 | Wang, Z.                  | 2018 | 1 | 1 | 1 | 1 | 1 | 1 | 1 | 1 | 1 | 8 | Low      |
| 28 | Xiao, Tingting            | 2018 | 1 | 1 | 1 | 1 | 1 | 1 | 1 | 1 | 1 | 8 | Low      |
| 29 |                           |      |   |   |   |   |   |   |   |   |   |   |          |
| 30 |                           |      |   |   |   |   |   |   |   |   |   |   |          |
| 31 |                           |      |   |   |   |   |   |   |   |   |   |   |          |
| 32 |                           |      |   |   |   |   |   |   |   |   |   |   |          |
| 33 |                           |      |   |   |   |   |   |   |   |   |   |   |          |
| 34 |                           |      |   |   |   |   |   |   |   |   |   |   |          |
| 35 |                           |      |   |   |   |   |   |   |   |   |   |   |          |
| 36 |                           |      |   |   |   |   |   |   |   |   |   |   |          |
| 37 |                           |      |   |   |   |   |   |   |   |   |   |   |          |
| 38 |                           |      |   |   |   |   |   |   |   |   |   |   |          |
| 39 |                           |      |   |   |   |   |   |   |   |   |   |   |          |
| 40 |                           |      |   |   |   |   |   |   |   |   |   |   |          |
| 41 |                           |      |   |   |   |   |   |   |   |   |   |   |          |
| 42 |                           |      |   |   |   |   |   |   |   |   |   |   |          |
| 43 |                           |      |   |   |   |   |   |   |   |   |   |   |          |
| 44 |                           |      |   |   |   |   |   |   |   |   |   |   |          |
| 45 |                           |      |   |   |   |   |   |   |   |   |   |   |          |
| 46 |                           |      |   |   |   |   |   |   |   |   |   |   |          |

1  
2  
3  
4  
5  
6  
7  
8  
9  
10  
11  
12  
13  
14  
15  
16  
17  
18  
19  
20  
21  
22  
23  
24  
25  
26  
27  
28  
29  
30  
31  
32  
33  
34  
35  
36  
37  
38  
39  
40  
41  
42  
43  
44  
45  
46

For peer review only

|                 |      |   |   |   |   |   |   |   |   |   |     |
|-----------------|------|---|---|---|---|---|---|---|---|---|-----|
| Zhang, Y.       | 2018 | 0 | 1 | 1 | 1 | 0 | 1 | 1 | 1 | 6 | Mod |
| Zheng, Si-Han   | 2018 | 1 | 1 | 1 | 1 | 1 | 1 | 1 | 1 | 8 | Low |
| Zheng, Guanghui | 2020 | 0 | 1 | 1 | 1 | 1 | 1 | 1 | 1 | 7 | Low |
| Zuo             | 2020 | 1 | 1 | 1 | 1 | 1 | 1 | 1 | 1 | 8 | Low |

1  
2  
3  
4  
5  
6  
7  
8  
9  
10  
11  
12  
13  
14  
15  
16  
17  
18  
19  
20  
21  
22  
23  
24  
25  
26  
27  
28  
29  
30  
31  
32  
33  
34  
35  
36  
37  
38  
39  
40  
41  
42  
43  
44  
45  
46

For peer review only



## PRISMA Checklist

| Section/topic             | # | Checklist item                                                                                                                                                                                                                                                                                              | Reported on page # |
|---------------------------|---|-------------------------------------------------------------------------------------------------------------------------------------------------------------------------------------------------------------------------------------------------------------------------------------------------------------|--------------------|
| <b>TITLE</b>              |   |                                                                                                                                                                                                                                                                                                             |                    |
| Title                     | 1 | Identify the report as a systematic review, meta-analysis, or both.                                                                                                                                                                                                                                         | Title page         |
| <b>ABSTRACT</b>           |   |                                                                                                                                                                                                                                                                                                             |                    |
| Structured summary        | 2 | Provide a structured summary including, as applicable: background; objectives; data sources; study eligibility criteria, participants, and interventions; study appraisal and synthesis methods; results; limitations; conclusions and implications of key findings; systematic review registration number. | 2                  |
| <b>INTRODUCTION</b>       |   |                                                                                                                                                                                                                                                                                                             |                    |
| Rationale                 | 3 | Describe the rationale for the review in the context of what is already known.                                                                                                                                                                                                                              | 4-5                |
| Objectives                | 4 | Provide an explicit statement of questions being addressed with reference to participants, interventions, comparisons, outcomes, and study design (PICOS).                                                                                                                                                  | 5                  |
| <b>METHODS</b>            |   |                                                                                                                                                                                                                                                                                                             |                    |
| Protocol and registration | 5 | Indicate if a review protocol exists, if and where it can be accessed (e.g., Web address), and, if available, provide registration information including registration number.                                                                                                                               | 6                  |
| Eligibility criteria      | 6 | Specify study characteristics (e.g., PICOS, length of follow-up) and report characteristics (e.g., years considered, language, publication status) used as criteria for eligibility, giving rationale.                                                                                                      | 7                  |
| Information sources       | 7 | Describe all information sources (e.g., databases with dates of coverage, contact with study authors to identify additional studies) in the search and date last searched.                                                                                                                                  | 6                  |

|                                    |    |                                                                                                                                                                                                                        |              |
|------------------------------------|----|------------------------------------------------------------------------------------------------------------------------------------------------------------------------------------------------------------------------|--------------|
| Search                             | 8  | Present full electronic search strategy for at least one database, including any limits used, such that it could be repeated.                                                                                          | 6            |
| Study selection                    | 9  | State the process for selecting studies (i.e., screening, eligibility, included in systematic review, and, if applicable, included in the meta-analysis).                                                              | 7            |
| Data collection process            | 10 | Describe method of data extraction from reports (e.g., piloted forms, independently, in duplicate) and any processes for obtaining and confirming data from investigators.                                             | 7-8          |
| Data items                         | 11 | List and define all variables for which data were sought (e.g., PICOS, funding sources) and any assumptions and simplifications made.                                                                                  | 7-8          |
| Risk of bias in individual studies | 12 | Describe methods used for assessing risk of bias of individual studies (including specification of whether this was done at the study or outcome level), and how this information is to be used in any data synthesis. | 9            |
| Summary measures                   | 13 | State the principal summary measures (e.g., risk ratio, difference in means).                                                                                                                                          | 8-9          |
| Synthesis of results               | 14 | Describe the methods of handling data and combining results of studies, if done, including measures of consistency (e.g., $I^2$ ) for each meta-analysis.                                                              | 8-9          |
| Risk of bias across studies        | 15 | Specify any assessment of risk of bias that may affect the cumulative evidence (e.g., publication bias, selective reporting within studies).                                                                           | 9            |
| Additional analyses                | 16 | Describe methods of additional analyses (e.g., sensitivity or subgroup analyses, meta-regression), if done, indicating which were pre-specified.                                                                       | 9            |
| <b>RESULTS</b>                     |    |                                                                                                                                                                                                                        |              |
| Study selection                    | 17 | Give numbers of studies screened, assessed for eligibility, and included in the review, with reasons for exclusions at each stage, ideally with a flow diagram.                                                        | 10, Figure.1 |

1  
2  
3  
4  
5  
6  
7  
8  
9  
10  
11  
12  
13  
14  
15  
16  
17  
18  
19  
20  
21  
22  
23  
24  
25  
26  
27  
28  
29  
30  
31  
32  
33  
34  
35  
36  
37  
38  
39  
40  
41  
42  
43  
44  
45  
46

|                               |    |                                                                                                                                                                                                          |                                 |
|-------------------------------|----|----------------------------------------------------------------------------------------------------------------------------------------------------------------------------------------------------------|---------------------------------|
| Study characteristics         | 18 | For each study, present characteristics for which data were extracted (e.g., study size, PICOS, follow-up period) and provide the citations.                                                             | 10, Table.1                     |
| Risk of bias within studies   | 19 | Present data on risk of bias of each study and, if available, any outcome level assessment (see item 12).                                                                                                | 10, Appendix.4                  |
| Results of individual studies | 20 | For all outcomes considered (benefits or harms), present, for each study: (a) simple summary data for each intervention group (b) effect estimates and confidence intervals, ideally with a forest plot. | 10, Table.1, Figure.2, Figure.3 |
| Synthesis of results          | 21 | Present results of each meta-analysis done, including confidence intervals and measures of consistency.                                                                                                  | 17, Figure.2, Figure.3          |
| Risk of bias across studies   | 22 | Present results of any assessment of risk of bias across studies (see Item 15).                                                                                                                          | 19, Figure.4                    |
| Additional analysis           | 23 | Give results of additional analyses, if done (e.g., sensitivity or subgroup analyses, meta-regression [see Item 16]).                                                                                    | 18-19                           |
| <b>DISCUSSION</b>             |    |                                                                                                                                                                                                          |                                 |
| Summary of evidence           | 24 | Summarize the main findings including the strength of evidence for each main outcome; consider their relevance to key groups (e.g., healthcare providers, users, and policy makers).                     | 24-27                           |
| Limitations                   | 25 | Discuss limitations at study and outcome level (e.g., risk of bias), and at review-level (e.g., incomplete retrieval of identified research, reporting bias).                                            | 27                              |
| Conclusions                   | 26 | Provide a general interpretation of the results in the context of other evidence, and implications for future research.                                                                                  | 27-28                           |
| <b>FUNDING</b>                |    |                                                                                                                                                                                                          |                                 |
| Funding                       | 27 | Describe sources of funding for the systematic review and other support (e.g., supply of data); role of funders for the systematic review.                                                               | 28                              |

1  
2  
3  
4  
5  
6  
7  
8  
9  
10  
11  
12  
13  
14  
15  
16  
17  
18  
19  
20  
21  
22  
23  
24  
25  
26  
27  
28  
29  
30  
31  
32  
33  
34  
35  
36  
37  
38  
39  
40  
41  
42  
43  
44  
45  
46

For peer review only

# BMJ Open

## The impact of carbapenem resistance on mortality in patients infected with Enterobacteriaceae: a systematic review and meta-analysis

|                                 |                                                                                                                                                                                                                                                                                                                                                                                                                                                                                                                                                                                                                                                                                                                                                                                                                                                                                                                                                                                                                                                                                                                                                                                                                                                                                                                                                                                                                                                                                             |
|---------------------------------|---------------------------------------------------------------------------------------------------------------------------------------------------------------------------------------------------------------------------------------------------------------------------------------------------------------------------------------------------------------------------------------------------------------------------------------------------------------------------------------------------------------------------------------------------------------------------------------------------------------------------------------------------------------------------------------------------------------------------------------------------------------------------------------------------------------------------------------------------------------------------------------------------------------------------------------------------------------------------------------------------------------------------------------------------------------------------------------------------------------------------------------------------------------------------------------------------------------------------------------------------------------------------------------------------------------------------------------------------------------------------------------------------------------------------------------------------------------------------------------------|
| Journal:                        | <i>BMJ Open</i>                                                                                                                                                                                                                                                                                                                                                                                                                                                                                                                                                                                                                                                                                                                                                                                                                                                                                                                                                                                                                                                                                                                                                                                                                                                                                                                                                                                                                                                                             |
| Manuscript ID                   | bmjopen-2021-054971.R1                                                                                                                                                                                                                                                                                                                                                                                                                                                                                                                                                                                                                                                                                                                                                                                                                                                                                                                                                                                                                                                                                                                                                                                                                                                                                                                                                                                                                                                                      |
| Article Type:                   | Original research                                                                                                                                                                                                                                                                                                                                                                                                                                                                                                                                                                                                                                                                                                                                                                                                                                                                                                                                                                                                                                                                                                                                                                                                                                                                                                                                                                                                                                                                           |
| Date Submitted by the Author:   | 29-Oct-2021                                                                                                                                                                                                                                                                                                                                                                                                                                                                                                                                                                                                                                                                                                                                                                                                                                                                                                                                                                                                                                                                                                                                                                                                                                                                                                                                                                                                                                                                                 |
| Complete List of Authors:       | Zhou, Ruyin; China Agricultural University, College of Economics and Management<br>Fang, Xiangming; China Agricultural University, College of Economics and Management; Georgia State University, School of Public Health<br>Zhang, Jinjin; China Agricultural University, College of Economics and Management<br>Zheng, Xiaodong; Zhejiang Gongshang University, School of Economics<br>Shangguan, Shuangyue; China Agricultural University, College of Economics and Management<br>Chen, Shibo; China Agricultural University, College of Veterinary Medicine<br>Shen, Yingbo; Chinese Academy of Sciences, CAS Key Laboratory of Pathogenic Microbiology and Immunology<br>Liu, Zhihai; Qingdao Agricultural University, College of Chemistry and Pharmaceutical Sciences<br>Li, Juan; Chinese Center for Disease Control and Prevention, State Key Laboratory for Infectious Disease Prevention and Control, Collaborative Innovation Center for Diagnosis and Treatment of Infectious Disease<br>Zhang, Rong; Zhejiang University, The Second Affiliated Hospital of Zhejiang University<br>Shen, Jianzhong; China Agricultural University, Beijing Key Laboratory of Detection Technology for Animal-Derived Food Safety, College of Veterinary Medicine<br>Walsh, Timothy R; University of Oxford, Department of Zoology<br>Wang, Yang; China Agricultural University, Beijing Key Laboratory of Detection Technology for Animal-Derived Food Safety, College of Veterinary Medicine |
| <b>Primary Subject Heading</b>: | Global health                                                                                                                                                                                                                                                                                                                                                                                                                                                                                                                                                                                                                                                                                                                                                                                                                                                                                                                                                                                                                                                                                                                                                                                                                                                                                                                                                                                                                                                                               |
| Secondary Subject Heading:      | Epidemiology, Global health, Public health                                                                                                                                                                                                                                                                                                                                                                                                                                                                                                                                                                                                                                                                                                                                                                                                                                                                                                                                                                                                                                                                                                                                                                                                                                                                                                                                                                                                                                                  |
| Keywords:                       | EPIDEMIOLOGY, Public health < INFECTIOUS DISEASES, Health policy < HEALTH SERVICES ADMINISTRATION & MANAGEMENT                                                                                                                                                                                                                                                                                                                                                                                                                                                                                                                                                                                                                                                                                                                                                                                                                                                                                                                                                                                                                                                                                                                                                                                                                                                                                                                                                                              |
|                                 |                                                                                                                                                                                                                                                                                                                                                                                                                                                                                                                                                                                                                                                                                                                                                                                                                                                                                                                                                                                                                                                                                                                                                                                                                                                                                                                                                                                                                                                                                             |

1  
2  
3  
4  
5  
6  
7  
8  
9  
10  
11  
12  
13  
14  
15  
16  
17  
18  
19  
20  
21  
22  
23  
24  
25  
26  
27  
28  
29  
30  
31  
32  
33  
34  
35  
36  
37  
38  
39  
40  
41  
42  
43  
44  
45  
46  
47  
48  
49  
50  
51  
52  
53  
54  
55  
56  
57  
58  
59  
60

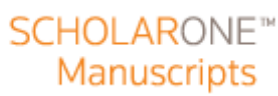

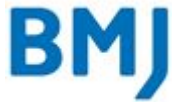

I, the Submitting Author has the right to grant and does grant on behalf of all authors of the Work (as defined in the below author licence), an exclusive licence and/or a non-exclusive licence for contributions from authors who are: i) UK Crown employees; ii) where BMJ has agreed a CC-BY licence shall apply, and/or iii) in accordance with the terms applicable for US Federal Government officers or employees acting as part of their official duties; on a worldwide, perpetual, irrevocable, royalty-free basis to BMJ Publishing Group Ltd ("BMJ") its licensees and where the relevant Journal is co-owned by BMJ to the co-owners of the Journal, to publish the Work in this journal and any other BMJ products and to exploit all rights, as set out in our [licence](#).

The Submitting Author accepts and understands that any supply made under these terms is made by BMJ to the Submitting Author unless you are acting as an employee on behalf of your employer or a postgraduate student of an affiliated institution which is paying any applicable article publishing charge ("APC") for Open Access articles. Where the Submitting Author wishes to make the Work available on an Open Access basis (and intends to pay the relevant APC), the terms of reuse of such Open Access shall be governed by a Creative Commons licence – details of these licences and which [Creative Commons](#) licence will apply to this Work are set out in our licence referred to above.

Other than as permitted in any relevant BMJ Author's Self Archiving Policies, I confirm this Work has not been accepted for publication elsewhere, is not being considered for publication elsewhere and does not duplicate material already published. I confirm all authors consent to publication of this Work and authorise the granting of this licence.

1  
2  
3  
4 **The impact of carbapenem resistance on mortality in patients infected with**  
5  
6 ***Enterobacteriaceae*: a systematic review and meta-analysis**  
7  
8  
9

10  
11 **Ruyin Zhou<sup>1</sup>, Xiangming Fang<sup>1,2</sup>, Jinjin Zhang<sup>1</sup>, Xiaodong Zheng<sup>3</sup>, Shuangyue Shangguan<sup>1</sup>, Shibo**

12  
13  
14 **Chen<sup>4</sup>, Yingbo Shen<sup>5</sup>, Zhihai Liu<sup>6</sup>, Juan Li<sup>7</sup>, Rong Zhang<sup>8</sup>, Jianzhong Shen<sup>9</sup>, Timothy R Walsh<sup>10</sup>,**

15  
16  
17 **Yang Wang<sup>9</sup>**  
18  
19

20  
21 <sup>1</sup>College of Economics and Management, China Agricultural University, Beijing, China;

22 <sup>2</sup>School of Public Health, Georgia State University, Atlanta, USA;

23 <sup>3</sup>School of Economics, Zhejiang Gongshang University, Hangzhou, China;

24 <sup>4</sup>College of Veterinary Medicine, China Agricultural University, Beijing, China;

25 <sup>5</sup>CAS Key Laboratory of Pathogenic Microbiology and Immunology, Institute of Microbiology, Chinese  
26 Academy of Sciences, Beijing, China;

27 <sup>6</sup>College of Chemistry and Pharmaceutical Sciences, Qingdao Agricultural University, Qingdao, China;

28 <sup>7</sup>State Key Laboratory for Infectious Disease Prevention and Control, Collaborative Innovation Center for  
29 Diagnosis and Treatment of Infectious Disease, National Institute for Communicable Disease Control and  
30 Prevention, China CDC, Beijing, China;

31 <sup>8</sup>The Second Affiliated Hospital of Zhejiang University, Zhejiang University, Hangzhou, China;

32 <sup>9</sup>Beijing Key Laboratory of Detection Technology for Animal-Derived Food Safety, College of Veterinary  
33 Medicine, China Agricultural University, Beijing, China;

34 <sup>10</sup>Department of Zoology, University of Oxford, Oxford, UK.  
35  
36  
37  
38  
39

40 Corresponding author:

41 Xiangming Fang, PhD

42 College of Economics and Management

43 China Agricultural University

44 Address: No.17, Qinghuadong Road,

45 Haidian District, Beijing, 100083, China

46 E-mail address: xmfang@cau.edu.cn  
47  
48  
49  
50  
51  
52

53 Word count: 4437  
54  
55  
56  
57  
58  
59  
60



## ABSTRACT

**Objectives** To provide a comprehensive assessment of the impact of carbapenem resistance on mortality among patients infected with *Enterobacteriaceae* and to explore the source of heterogeneity across studies.

**Design** This systematic review was conducted following the guidelines of Cochrane Guidance and the Preferred Reporting Items for Systematic Reviews and Meta-Analyses (PRISMA).

**Data sources** We conducted a systematic literature search of the PubMed, Embase, Web of Science, and Cochrane Library databases to identify relevant studies published between 1 January 1994 and 30 August 2020.

**Eligibility criteria** We included primary observational studies published in English that reported the mortality outcomes for hospitalized patients with confirmed infections due to carbapenem-resistant *Enterobacteriaceae* (CRE) and carbapenem-susceptible *Enterobacteriaceae* (CSE). Studies with no comparison group or with a comparison group of patients infected with unconfirmed CSE were excluded.

**Data extraction and synthesis** Data extraction and assessment of risk bias were conducted independently by two reviewers. The pooled relative risk (RR) and risk difference (RD) were calculated as effect measures with 95% confidence intervals using a random-effects model. The heterogeneity across studies was assessed by Q-statistic and  $I^2$  measures.

**Results** Of 10,304 studies initially identified, 50 studies were included in the meta-analyses. The results of the meta-analyses showed that carbapenem resistance has a significant positive effect on the probability of death for patients infected with *Enterobacteriaceae* for any type of mortality outcome. The results of the stratified analysis and meta-regression suggested that the effect of carbapenem resistance on the risk of death varied by infection type, sample size, and year of publication.

**Conclusions** Our results suggested that patients with CRE infection still face a greater risk of death than

1  
2  
3  
4 patients with CSE infection do, and an urgent need to develop new antibiotics and appropriate treatments  
5  
6  
7 to reduce the risk of death.  
8  
9  
10

### 11 **Strengths and limitations of this study**

- 14 ➤ This study provided a comprehensive meta-analysis to assess the impact of carbapenem resistance on  
15 mortality among patients infected with *Enterobacteriaceae*, including nearly 20 new published  
16 studies in the last three years that were not included in previous relevant reviews.  
17  
18  
19  
20  
21
- 22 ➤ The statistical test and meta-regression analysis in this study was conducted for different groups of  
23 mortality outcome type, which may help to address the potential heterogeneity caused by the factor of  
24 mortality measurements.  
25  
26  
27  
28  
29
- 30 ➤ This review is the first to explore the source of heterogeneity across studies through meta-regression  
31 analysis and to consider the country's economic status and geographical region in assessing the  
32 association between carbapenem resistance and mortality among patients infected with  
33 *Enterobacteriaceae*.  
34  
35  
36  
37  
38  
39
- 40 ➤ This review includes effect measures in both relative and absolute terms, thus providing a complete  
41 picture of the effect of carbapenem resistance on mortality among patients infected with  
42 *Enterobacteriaceae*.  
43  
44  
45  
46  
47  
48
- 49 ➤ The comparison in our research is currently limited to high-income and upper-middle-income  
50 countries from the Americas, Asia, and Europe due to insufficient data from elsewhere; more studies  
51 from different countries, especially low-income countries and other regions, are needed to provide  
52 comprehensive data for further analysis stratified by geographical region and economic status.  
53  
54  
55  
56  
57  
58  
59  
60

## INTRODUCTION

The *Enterobacteriaceae* species, mainly *Klebsiella pneumoniae* and *Escherichia coli*, can cause infections like bloodstream infections, ventilator-associated pneumonia, intra-abdominal infections, and urinary tract infections in both healthcare and community settings.<sup>1</sup> The treatment of these infections is becoming increasingly challenging because of the increasing prevalence of multi-drug-resistant *Enterobacteriaceae*, such as extended-spectrum  $\beta$ -lactamases (ESBLs)-producing *Enterobacteriaceae*. To counter this challenge, carbapenems were introduced in the 1980s<sup>2</sup> and proved efficacious in the clinical treatment of infections caused by ESBLs-producing *Enterobacteriaceae*.<sup>3</sup> However, since the carbapenem-resistant *Enterobacteriaceae* (CRE) emerged in the early 1990s,<sup>4</sup> CRE has been increasingly reported worldwide.<sup>5,6</sup> The prevalence of CRE is driven primarily by the spread of carbapenemases, a group of  $\beta$ -lactamases hydrolyzing carbapenems.<sup>7</sup> The CRE strains that produce diverse types of carbapenemases are endemic in different areas of the world.<sup>8</sup> Countries that have high overall rates of CRE include Greece, Italy, Brazil, China, the United States, and Colombia.<sup>7</sup> For example, the rate of carbapenem resistance in *Klebsiella pneumoniae* isolates was as high as 63.9% in Greece in 2018.<sup>9</sup> The increasing prevalence of CRE has posed a serious threat to public health because of the reduced efficacy of carbapenem and limited available therapy options, so CRE has been categorized as the most critical group of multidrug-resistant pathogens with the most urgent need for new antibiotics.<sup>10</sup>

The mortality of CRE infections is a research hotspot. Recently, some systematic reviews have included meta-analyses to assess the association between CRE infections and mortality by comparing with the mortality outcome of patients infected with carbapenem-susceptible *Enterobacteriaceae*(CSE).<sup>11-16</sup> The results showed that CRE infections could lead to increased mortality. The latest systematic review on this topic included studies published until 2017,<sup>12</sup> but nearly 20 relevant articles have been published since

1  
2  
3  
4 then. A timely and comprehensive summary of the results of these articles can help explain the excess  
5  
6 health burden that is attributable to carbapenem-resistant *Enterobacteriaceae* (CRE) infections. Moreover,  
7  
8 although previous systematic reviews have identified heterogeneity across studies and discussed some  
9  
10 confounding factors of mortality, including patient-, infection-, organism-, and therapy-related  
11  
12 factors,<sup>12,13,15</sup> few used a formal statistical approach or meta-regression analysis to examine whether the  
13  
14 effect of carbapenem resistance on mortality varies by these factors. In addition, these earlier reviews have  
15  
16 not considered differences in economic status and geographical region. The development of antibiotic  
17  
18 resistance has resulted in decreasing effectiveness of first-line antibiotics, such that more expensive  
19  
20 second- and third-line antibiotic treatments must be used. However, these treatments may be unobtainable  
21  
22 or unaffordable for patients with resistant infections in developing countries,<sup>17</sup> which would result in  
23  
24 worse prognostic outcomes. The effect of carbapenem resistance on mortality may have regional  
25  
26 differences because the CRE strains with different types of carbapenemases and virulence characteristics<sup>1</sup>  
27  
28 are predominant in different regions worldwide.<sup>8</sup> Two previous reviews have shown that the mortality rate  
29  
30 of patients with CRE infections differs by geographical region.<sup>14,18</sup> However, without data from control  
31  
32 groups, whether the impact of carbapenem resistance on mortality differs between the region will remain  
33  
34 unknown.  
35  
36  
37  
38  
39  
40  
41  
42  
43  
44  
45

46 Therefore, we aim to provide a comprehensive systematic review of the impact of carbapenem  
47  
48 resistance on mortality among patients infected with *Enterobacteriaceae* and explore the source of  
49  
50 heterogeneity among studies to help policymakers to develop strategies and policies to combat CRE  
51  
52 worldwide.  
53  
54  
55  
56  
57  
58  
59  
60

## METHODS

This systematic review was conducted following the guidelines of Cochrane Guidance<sup>19</sup> and the Preferred Reporting Items for Systematic Reviews and Meta-Analyses (PRISMA).<sup>20</sup> The protocol was registered with PROSPERO on July 5, 2020(CRD42020176808). The initial protocol was designed with a broad scope, but we divided our work into two parts to limit its length: the first (this study) focuses on mortality, and the second will focus on morbidity and the economic outcomes.

### Search strategy

We conducted a systematic literature search of the databases of PubMed, Embase, Web of Science, and the Cochrane Library for relevant studies published between 1 January 1994, and 30 August 2020 to identify eligible studies. This period was chosen because carbapenem-resistant *Enterobacteriaceae* were first reported in the 1990s. Specifically, the strains producing Metallo- $\beta$ -lactamase(MBL)IMP-1, which is a type of carbapenemase that can hydrolyze carbapenems, were first identified in Japan in a study published in 1994.<sup>4</sup>

The search strategy was designed by combining the terms for bacteria and carbapenem resistance (See Supplementary Material Appendix 1). The search terms for the bacteria were “*Enterobacteriaceae*,” along with “*Klebsiella pneumoniae*” and “*Escherichia coli*,”(the two most clinically important pathogens within the *Enterobacteriaceae* family). The search terms for carbapenem resistance were “carbapenem-resistant,” “carbapenem resistance,” “carbapenem non-susceptible,” and “carbapenemase-producing” because CRE can be generally divided into carbapenemase-producing CRE (CP-CRE) and non-carbapenemase-producing CRE (non-CP-CRE).<sup>21</sup>

## Selection criteria

We included studies that fulfilled all of the following criteria: (1) primary observational studies (i.e., case-control study, cohort study); (2) studies published between 1 January 1994 and 30 August 2020; (3) studies published in English; and (4) studies that assessed the mortality of hospitalized patients with confirmed infections due to CRE and CSE.

Studies that met any of the following criteria were excluded: (1) studies that could not provide the mortality data for patients with confirmed CRE infection; (2) studies that focused on the resistance of other antibiotics instead of carbapenem antibiotics; (3) Studies with no comparison group or with a comparison group of patients infected with unconfirmed CSE; (4) studies on animals; or (5) publications like editorials and letters. The list of excluded studies with reasons for exclusion is provided in Supplementary Material Appendix 2.

Two reviewers independently screened all titles and abstracts of the initially identified studies and then reviewed the full text of studies that met all of the inclusion criteria and none of the exclusion criteria. Disagreements were resolved through consensus or discussion with a third senior reviewer.

## Data extraction

Data were extracted from each selected study into a data extraction form in Excel. The extracted data included the first author, year of publication, study period, country, region, country income level classified by the World Bank,<sup>22</sup> study design, infection type, specific pathogen, sample size, and the number of deaths in CRE and CSE groups. Notably, we assigned the income status of the country based on the period when the study was conducted because the income status of some countries may have changed between

1  
2  
3  
4 1994 and 2020. For example, there were 15 studies conducted in China between 2006 and 2018 included in  
5  
6 this meta-analysis, but since the income status of China changed from the lower-income level to the  
7  
8 upper-income level in 2010, the two studies conducted between 2006 and 2009 were classified as lower  
9  
10 middle income, and the other 13 studies conducted after 2010 were classified as upper middle income. The  
11  
12 kinds of measurements of mortality outcomes that were extracted from included studies were all-cause  
13  
14 in-hospital mortality, all-cause mortality at 6-30 days (6 days, 7 days, 14 days, 21 days, 28 days, 30 days)  
15  
16 after diagnosis, mortality in ICU, 30d mortality in ICU, and mortality attributable to infection, which is  
17  
18 usually defined as the death of a patient with clinical and laboratory evidence of ongoing infection in the  
19  
20 absence of other feasible reasons.  
21  
22  
23  
24  
25

26  
27 Data extraction was conducted by two reviewers independently and disagreements were resolved  
28  
29 through consensus or discussion with a third senior reviewer.  
30  
31  
32  
33  
34

### 35 **Data synthesis and analysis**

36  
37 We calculated the pooled relative risk (RR) and risk difference (RD) by comparing the mortality of  
38  
39 patients with CRE infection with that of patients with CSE infection. We choose RR as the relative  
40  
41 measure rather than the odds ratio (OR) because the latter was more difficult to interpret than RR<sup>23,24</sup> and  
42  
43 is usually misinterpreted as RR, which may overestimate the intervention effect when RR is more than 1.<sup>25</sup>  
44  
45 We also calculated RD to describe the absolute difference in the risk of mortality between the two groups  
46  
47 because reporting only the relative risk may conceal the underlying absolute risks, resulting in readers'  
48  
49 overestimating the effect.<sup>26</sup> It has been recommended that both relative risk and absolute risk should be  
50  
51 reported to provide a complete picture of the effect.<sup>27</sup> We calculated the pooled estimates of RRs and RDs  
52  
53 with 95% confidence intervals were calculated using a random-effects model based on the method of  
54  
55  
56  
57  
58  
59  
60

1  
2  
3  
4 DerSimonian & Laird,<sup>28</sup> with the estimate of heterogeneity being taken from the Mantel-Haenszel model.

5  
6 An RR of 1 and an RD of 0 indicate that the risk of mortality is identical regardless of carbapenem  
7  
8 resistance. When  $RR > 1$  or  $RD > 0$ , it means carbapenem resistance has a positive effect on the risk of death  
9  
10 for patients infected with *Enterobacteriaceae*; in other words, the risk of death from CRE infection is  
11  
12 higher than that from CSE infection. The heterogeneity across studies was assessed by Q-statistic and  $I^2$   
13  
14 measures. The heterogeneity was considered substantial when  $I^2 > 50\%$ .  
15  
16  
17  
18  
19

20 In the primary analysis, we calculated the pooled estimates of the overall mortality using one  
21  
22 mortality outcome in each study with a priority given to in-hospital mortality and the latest time point of  
23  
24 mortality if mortality outcomes at multiple time points were reported in a study. Then we categorized the  
25  
26 mortality measurements into eight groups and conducted meta-analysis for each type of mortality outcome.  
27  
28 In further analysis, to identify the potential sources of heterogeneity, we conducted stratified analysis by  
29  
30 bacterial species, geographical region, economic status, source of infection, sample size, and resistance  
31  
32 mechanism in the mortality outcome groups in which substantial heterogeneity was detected. An F-test  
33  
34 based on a one-way analysis of variance (ANOVA) was used to test the differences in the mean effect  
35  
36 estimates between subgroups. We also conducted a random-effects meta-regression analysis in the group  
37  
38 of mortality outcome type with more than ten studies. The meta-regression analysis was based on  
39  
40 restricted maximum likelihood using an iterative procedure to determine whether the effect estimates differ  
41  
42 significantly by the above variables, and  $P < 0.1$  was considered statistically significant. A sensitivity  
43  
44 analysis was conducted for the overall mortality, with the pooled RRs recalculated using random-effects  
45  
46 meta-analysis after removing one study at a time to evaluate the stability of the results. Finally, we  
47  
48 conducted a funnel plot for the overall mortality to assess the publication bias. All the statistical analyses  
49  
50 were conducted using the Stata version 15 software.  
51  
52  
53  
54  
55  
56  
57  
58  
59  
60



### **Risk of bias assessment**

Two reviewers independently assessed the risk of bias for each included study using the Newcastle-Ottawa quality assessment scale (NOS) for observational studies,<sup>29</sup> and disagreements were resolved through consensus or discussion with a third senior reviewer.

### **Patient and public involvement**

Patients and the public were not involved in the design, or conduct, or reporting, or dissemination plans of this systematic review.

## **RESULTS**

We identified 10,304 studies from the literature search, among which 50 studies<sup>30-79</sup> were selected for final review based on the inclusion and exclusion criteria (Figure1). The basic characteristics of the included studies are provided in Table.1, and Table S1 in Supplementary Material Appendix 3 shows the details of the studies. The studies were conducted in 14 countries from four regions. Nearly half of the studies were conducted in Asia (n=24), followed by the Americas (n=15) and Europe (n=9), with only one study conducted in Africa. We also included a multi-region study that contained data from Asia, Africa, and South America.<sup>79</sup> Most of the studies were conducted in high-income countries (n=27) and upper-middle-income countries (n=19), only three studies were conducted in lower-middle-income countries and no study conducted in a low-income country met the criteria. Most studies (n=39) reported mortality outcomes of infections that were due to *Klebsiella pneumoniae* pathogens, while two studies reported mortality outcomes of infections that were due to *Escherichia coli*, and nine studies reported

1  
2  
3  
4 mortality outcomes regardless of the specific species of *Enterobacteriaceae*. Nearly half of the studies  
5  
6 (n=24) evaluated infected patients regardless of specific infection type. Among the studies that focused on  
7  
8 specific sites of infection, bloodstream infection was the most frequent type (n=21), followed by urinary  
9  
10 tract infection (n=3), and one study each for neurosurgical infection and pneumonia. Among the 50 studies  
11  
12 included, most were cohort studies (n=29). In the other 21 case-control studies, the mortality outcomes  
13  
14 were measured using a cohort study design, so these studies were assessed as cohort studies in our quality  
15  
16 appraisal. The NOS assessment for the risk of bias of all included studies is summarized in Supplementary  
17  
18 Material Appendix 4. According to the NOS scores, 46 were categorized as having a low risk of bias  
19  
20 (scoring 7 to 9) and only 4 studies were categorized as having the moderate risk of bias (scoring 4 to 6).  
21  
22  
23  
24  
25  
26  
27  
28  
29  
30  
31  
32  
33  
34  
35  
36  
37  
38  
39  
40  
41  
42  
43  
44  
45  
46  
47  
48  
49  
50  
51  
52  
53  
54  
55  
56  
57  
58  
59  
60

**Table 1 Characteristics of included studies**

| First Author (Year)                    | Study period                   | Country      | Infection type | Pathogen                 | Mortality outcomes                                                            |
|----------------------------------------|--------------------------------|--------------|----------------|--------------------------|-------------------------------------------------------------------------------|
| Alicino (2015) <sup>30</sup>           | 2007.01-2014.12                | Italy        | BSI            | <i>K. pneumoniae</i>     | 30d mortality                                                                 |
| Balkhair (2019) <sup>31</sup>          | 2007.01-2016.12                | Oman         | BSI            | <i>K. pneumoniae</i>     | 30d mortality                                                                 |
| Ben-David (2012) <sup>32</sup>         | 2006.01-2006.12                | Israel       | BSI            | <i>K. pneumoniae</i>     | in-hospital mortality , mortality attributable to infection                   |
| Brizendine (2015) <sup>33</sup>        | 2006-2012                      | USA          | UTI            | <i>K. pneumoniae</i>     | in-hospital mortality                                                         |
| Chang (2019) <sup>34</sup>             | 2014.01-2018.07                | China        | BSI            | <i>K. pneumoniae</i>     | 7d mortality, 28d mortality, in-hospital mortality                            |
| Chang (2011) <sup>35</sup>             | 2006.1-2008.12                 | China        | BSI            | <i>E. coli</i>           | 14d hospital mortality, 28d hospital mortality, in-hospital mortality         |
| Chiotos (2018) <sup>36</sup>           | 2011.1-2016.7                  | USA          | Mixed          | Enterobacteriaceae       | 30d mortality                                                                 |
| Cienfuegos-Gallet (2019) <sup>37</sup> | 2014.02-03;<br>2014.10-2015.09 | Colombia     | Mixed          | <i>K. pneumoniae</i>     | 30d mortality                                                                 |
| Correa (2013) <sup>38</sup>            | 2006.1-2008.8                  | Brazil       | Mixed          | <i>K. pneumoniae</i>     | in-hospital mortality                                                         |
| Cubero (2015) <sup>39</sup>            | 2010.10-2012.12                | Spain        | Mixed          | <i>K. pneumoniae</i>     | in-hospital mortality                                                         |
| Daikos (2009) <sup>40</sup>            | 2004.2-2006.3                  | Greece       | BSI            | <i>K. pneumoniae</i>     | 14d mortality                                                                 |
| Fraenkel-Wandel (2016) <sup>41</sup>   | 2006-2012                      | Israel       | BSI            | <i>K. pneumoniae</i>     | in-hospital mortality                                                         |
| Gallagher (2014) <sup>42</sup>         | 2005.6-2010.10                 | USA          | BSI            | <i>K. pneumoniae</i>     | in-hospital mortality                                                         |
| Garbati (2016) <sup>43</sup>           | 2012.3-2013.12                 | Saudi Arabia | Mixed          | Enterobacteriaceae       | in-hospital mortality                                                         |
| Gomez Rueda (2014) <sup>44</sup>       | 2008.1-2011.1                  | Colombia     | Mixed          | <i>K. pneumoniae</i>     | in-hospital mortality                                                         |
| Hoxha (2016) <sup>45</sup>             | 2012.11-2013.7                 | Italy        | Mixed          | <i>K. pneumoniae</i>     | 6d mortality, 30d mortality                                                   |
| Huang (2018) <sup>46</sup>             | 2017.01-2017.12                | China        | Mixed          | <i>K. pneumoniae</i>     | in-hospital mortality                                                         |
| Hussein (2013) <sup>47</sup>           | 2006.1-2008.12                 | Israel       | BSI            | <i>K. pneumoniae</i>     | 30d mortality                                                                 |
| Kotb (2020) <sup>48</sup>              | 2011-2017                      | Egypt        | Mixed          | Enterobacteriaceae       | mortality in ICU                                                              |
| Lee (2016) <sup>49</sup>               | 2013.1-2014.2                  | Korea        | Mixed          | Enterobacteriaceae       | 28d mortality, in-hospital mortality                                          |
| Li (2019) <sup>50</sup>                | 2014.1-2018.6                  | China        | Mixed          | <i>K. pneumoniae</i>     | 30d mortality in ICU                                                          |
| Liu (2019) <sup>51</sup>               | 2014.1-2018.9                  | China        | BSI            | <i>K. pneumoniae</i>     | 30d mortality                                                                 |
| Liu (2012) <sup>52</sup>               | 2007.1-2009.12                 | China        | BSI            | <i>K. pneumoniae</i>     | 14d mortality, 28d mortality, in-hospital mortality                           |
| Mclaughlin (2014) <sup>53</sup>        | 2010.3-2011.12                 | USA          | BSI            | <i>K. pneumoniae</i>     | in-hospital mortality                                                         |
| Meng (2017) <sup>54</sup>              | 2012.1-2015.12                 | China        | Mixed          | <i>Escherichia. coli</i> | in-hospital mortality                                                         |
| Mouloudi (2010) <sup>55</sup>          | 2007.1-2008.12                 | Greece       | BSI            | <i>K. pneumoniae</i>     | in-hospital mortality , mortality in ICU, mortality attributable to infection |
| Ny (2015) <sup>56</sup>                | 2011.1-2013.12                 | USA          | Mixed          | <i>K. pneumoniae</i>     | in-hospital mortality                                                         |
| Orsi (2013) <sup>57</sup>              | 2008.7-2011.6                  | Italy        | Mixed          | <i>K. pneumoniae</i>     | in-hospital mortality                                                         |
| Pan (2019) <sup>58</sup>               | 2014                           | China        | Mixed          | <i>K. pneumoniae</i>     | in-hospital mortality                                                         |
| Patel (2008) <sup>59</sup>             | 2004.7-2006.6                  | USA          | Mixed          | <i>K. pneumoniae</i>     | in-hospital mortality , mortality attributable to infection                   |
| Pereira (2015) <sup>60</sup>           | 2010.1-2013.1                  | USA          | Mixed          | <i>K. pneumoniae</i>     | in-hospital mortality                                                         |
| Pouch (2015) <sup>61</sup>             | 2007.1-2010.12                 | USA          | UTI            | Enterobacteriaceae       | in-hospital mortality                                                         |
| Qureshi (2012) <sup>62</sup>           | 2011.1-2014.12                 | USA          | BSI            | <i>K. pneumoniae</i>     | 28d mortality                                                                 |
| Sánchez-Romero (2011) <sup>63</sup>    | 2009.1-2009.12                 | Spain        | Mixed          | <i>K. pneumoniae</i>     | 14d mortality                                                                 |
| Schwaber (2008) <sup>64</sup>          | 2003.9-2006.12                 | Israel       | Mixed          | <i>K. pneumoniae</i>     | in-hospital mortality                                                         |
| Shilo (2013) <sup>65</sup>             | 2006.1-2009.12                 | Israel       | UTI            | <i>K. pneumoniae</i>     | in-hospital mortality                                                         |
| Simkins (2014) <sup>66</sup>           | 2006.1-2010.12                 | USA          | Mixed          | <i>K. pneumoniae</i>     | in-hospital mortality                                                         |
| Tian (2016) <sup>67</sup>              | 2011.1-2015.12                 | China        | BSI            | <i>K. pneumoniae</i>     | in-hospital mortality , mortality attributable to infection, 28d mortality    |
| Torres-Gonzalez (2016) <sup>68</sup>   | 2013.11-2015.7                 | Mexico       | Mixed          | Enterobacteriaceae       | mortality attributable to infection                                           |
| Treccarich (2016) <sup>69</sup>        | 2010.1-2014.6                  | Italy        | BSI            | <i>K. pneumoniae</i>     | 21d mortality                                                                 |
| Ulu (2015) <sup>70</sup>               | 2012.1-2012.12                 | Turkey       | Mixed          | <i>K. pneumoniae</i>     | mortality in ICU                                                              |
| Vardakas (2015) <sup>71</sup>          | 2006.1-2009.10                 | Greece       | Mixed          | <i>K. pneumoniae</i>     | mortality in ICU                                                              |

|                                 |                |              |                         |                    |                                                             |
|---------------------------------|----------------|--------------|-------------------------|--------------------|-------------------------------------------------------------|
| Wang (2018) <sup>72</sup>       | 2010.1-2014.12 | China        | Mixed                   | K. pneumoniae      | in-hospital mortality                                       |
| Xiao (2018) <sup>73</sup>       | 2013.1-2015.12 | China        | BSI                     | K. pneumoniae      | 30d mortality                                               |
| Zhang (2018) <sup>74</sup>      | 2011.1-2014.12 | China        | BSI                     | K. pneumoniae      | 7d mortality, 28d mortality, in-hospital mortality          |
| Zheng (2018) <sup>75</sup>      | 2014.1-2016.12 | China        | BSI                     | K. pneumoniae      | 28d mortality                                               |
| Zheng (2020) <sup>76</sup>      | 2012-2017      | China        | Neurosurgical infection | Enterobacteriaceae | mortality attributable to infection                         |
| Zuo (2020) <sup>77</sup>        | 2015-2017      | China        | Pneumonia               | K. pneumoniae      | in-hospital mortality , mortality attributable to infection |
| Villegas (2016) <sup>78</sup>   | 2013.7-2014.11 | 7 countries  | BSI                     | Enterobacteriaceae | in-hospital mortality , mortality attributable to infection |
| Stewardson (2019) <sup>79</sup> | 2014.8-2015.6  | 10 countries | BSI                     | Enterobacteriaceae | in-hospital mortality                                       |

BSI, bloodstream infection; UTI, urinary tract infection; K.pneumoniae, Klebsiella pneumoniae; E.coli, Escherichia. coli

For peer review only

## Meta-analysis results

Among the 50 studies included, 10 different measures of mortality were reported. In-hospital mortality (n=31) was most frequently reported, followed by 28-day mortality (n=9), 30-day mortality (n=8), mortality attributable to infection (n=8), 14-day mortality (n=4), and mortality in ICU (n=4). The mortality rates that were not commonly reported were 7-day mortality (n=2), 6-day mortality (n=1), 21-day mortality (n=1), and 30-day mortality in the ICU (n=1). The meta-analysis result for the overall mortality based on the measure of relative risk (RR, 2.14, 95% CI, 1.85-2.48;  $I^2=80.0\%$ ) (Figure 2) and risk difference (RD, 0.22, 95% CI, 0.18-0.26,  $I^2=78.0\%$ ) (Figure 3) suggested that carbapenem resistance was associated with increased risk of overall mortality, although a high level of heterogeneity was detected in these results.

The results of meta-analyses for different mortality outcome types showed that the  $I^2$  for the pooled RR and RD was 0 in the studies that reported 14-day mortality, 6-day or 7-day mortality, and mortality in ICU, demonstrating low heterogeneity (Table 2). Among these three groups, the lowest pooled RR (1.17, 95% CI, 1.08-1.28) and RD (0.09, 95% CI, 0.04-0.14) was from the studies that reported mortality in the ICU. Although the pooled RR for 6-day or 7-day mortality (RR, 3.68, 95% CI, 2.32-5.83) was higher than that for 14-day mortality (RR, 1.70, 95% CI, 1.24-2.35), the pooled RD for both groups was 0.18. However, substantial heterogeneity was detected in the groups of studies that reported in-hospital mortality, 28-day or 30-day mortality, or mortality that was attributable to infection, which suggests other sources of heterogeneity.

## Stratified analysis

To explore the source of heterogeneity between studies, we conducted a stratified analysis for each type of mortality outcome that had substantial heterogeneity. The potential sources of heterogeneity we explored

1  
2  
3  
4 were pathogens, geographical region, economic status of the country, source of infection, resistance  
5  
6 mechanism type, sample size, and publication year. One study<sup>79</sup> was not included in our subgroup analysis  
7  
8 by geographical region and country income level, because it was conducted in 10 countries with different  
9  
10 economic status from three continents.  
11  
12

13  
14 For in-hospital mortality, carbapenem resistance had a significant positive effect on the risk of  
15  
16 death for patients infected with *Enterobacteriaceae* in most subgroups. However, in-hospital mortality was  
17  
18 not significantly different in either relative or absolute terms between CRE infection and CSE infection in  
19  
20 studies that focused on patients infected with *Escherichia coli* pathogens (RR, 3.83, 95% CI, 0.46-31.78,  
21  
22 p=0.214; RD, 0.27, 95% CI, -0.06-0.59, p=0.115) or OXA-producing *Enterobacteriaceae* (RR, 3.15, 95%  
23  
24 CI, 0.45-21.96, p=0.247; RD, 0.24, 95% CI, -0.05-0.53, p=0.110). In addition, no significant difference in  
25  
26 pooled RR for in-hospital mortality was observed in studies that focused on patients with urinary tract  
27  
28 infections (RR, 2.40, 95% CI, 0.82-7.03, p=0.110). The statistical test based on RR and RD showed that  
29  
30 the effect of carbapenem resistance on mortality was not significantly different between the subgroups  
31  
32 (Table S2 in Supplementary Material Appendix 5).  
33  
34  
35  
36  
37  
38  
39  
40

41 For 28-day or 30-day mortality, the subgroup analysis showed no significant difference in the  
42  
43 mortality for CRE and CSE infections that were due to mixed *Enterobacteriaceae* pathogens (RR, 1.78,  
44  
45 95% CI, 0.57-5.60, p=0.321; RD, 0.05, 95% CI, -0.03-0.13, p=0.213). The results of the statistical tests  
46  
47 based on RR showed that the later studies, those that were published from 2017 to 2020, reported higher  
48  
49 RR for 28-day or 30-day mortality for patients who were infected with CRE versus CSE patients (p=0.006)  
50  
51 than did studies that were published earlier. The statistical test results for 28-day or 30-day mortality  
52  
53 showed that the pooled RD in studies with fewer than 100 patients was higher than that in studies with  
54  
55 100-200 patients. Although the pooled RD in studies with more than 200 patients was highest, the  
56  
57  
58  
59  
60

1  
2  
3  
4 heterogeneity in this group was high and should be interpreted with caution (Table S3 in Supplementary  
5  
6  
7 Material Appendix 5).

8  
9 For mortality attributable to infection, the one study conducted in Europe with a sample size of  
10  
11 fewer than 100 has found no significant difference in the risk of death for CRE and CSE infection (RR,  
12  
13 1.98, 95% CI, 0.61-6.43,  $p=0.255$ ; RD, 0.13, 95% CI, -0.07-0.34,  $p=0.195$ ), nor the study that focused on  
14  
15 patients infected with OXA-producing *Enterobacteriaceae* (RR, 1.50, 95% CI, 0.43-5.28,  $p=0.528$ ; RD,  
16  
17 0.04, 95% CI, -0.09-0.17,  $p=0.572$ ). The results of statistical tests based on RD indicate that the effect of  
18  
19 carbapenem resistance on attributable mortality is varied by the type of infection ( $p=0.075$ ). Patients with  
20  
21 neurosurgical infection were at greater risk of attributable death that was due to CRE infection than other  
22  
23 types of infection (Table S4 in Supplementary Material Appendix 5).  
24  
25  
26  
27  
28  
29  
30  
31  
32

### 33 **Meta-regression**

34  
35 To further explore whether the effect of carbapenem resistance on mortality differs by the variables of  
36  
37 pathogens, geographical region, economic status of the country, source of infection, resistance mechanism  
38  
39 type, sample size, and publication year, we conducted the univariate meta-regression in the groups of  
40  
41 mortality outcome type with more than 10 studies. The meta-regression results based on RD showed that  
42  
43 the effect of carbapenem resistance on mortality was not influenced significantly by all the variables (Table  
44  
45 S5, S6 in Supplementary Material Appendix 5). However, in terms of relative risk, the meta-regression for  
46  
47 in-hospital mortality suggested that the influence of carbapenem resistance on in-hospital mortality in  
48  
49 studies published between 2017 and 2020 was significantly greater than that in studies published between  
50  
51 2011 and 2013 (coefficient=-0.447,  $p=0.027$ ) and in studies published from 2014 to 2016  
52  
53 (coefficient=-0.343,  $p=0.061$ ) (Table S7 in Supplementary Material Appendix 5). The results of the  
54  
55  
56  
57  
58  
59  
60

1  
2  
3  
4 meta-regression for 28-day or 30-day mortality based on RR were similar to the results for in-hospital  
5  
6 mortality. Moreover, the effect of carbapenem resistance on mortality at 28-day or 30-day tends to increase  
7  
8 with the year of publication (coefficient=-0.0001, p=0.006) (Table S8 in Supplementary Material  
9  
10 Appendix 5).  
11  
12

### 13 14 **Sensitivity analysis**

15  
16  
17 To assess the influence of individual studies on the results, we performed a sensitivity analysis by  
18  
19 removing one study at a time and recalculated the pooled RRs of the overall mortality among the  
20  
21 remaining studies using random-effects meta-analysis. We found that the direction of the effect did not  
22  
23 change when any one study was excluded, which indicates the stability of the results of the meta-analysis.  
24  
25  
26  
27  
28  
29

### 30 31 **Publication bias**

32  
33 Publication bias was assessed by a funnel plot (Figure 4). Slight asymmetry was observed in the funnel  
34  
35 plots and the points were heavily distributed at the top right, implying a lack of smaller studies that showed  
36  
37 a negative association between carbapenem resistance and mortality.  
38  
39  
40  
41  
42  
43  
44  
45  
46  
47  
48  
49  
50  
51  
52  
53  
54  
55  
56  
57  
58  
59  
60



Table 2 Pooled estimated results for different type of mortality outcome

| Mortality outcome type              | No. of studies | No. of CRE patients | No. of CSE patients | Unweighted                            | Unweighte                               | RR (95%CI)        | P value (significance tests of RR=1) | I <sup>2</sup> (%) | RD (95%CI)        | P value (significance tests of RD=0) | I <sup>2</sup> (%) |
|-------------------------------------|----------------|---------------------|---------------------|---------------------------------------|-----------------------------------------|-------------------|--------------------------------------|--------------------|-------------------|--------------------------------------|--------------------|
|                                     |                |                     |                     | means of mortality among CRE patients | d means of mortality among CSE patients |                   |                                      |                    |                   |                                      |                    |
| In-hospital mortality               | 31             | 1668                | 3753                | 42.30%                                | 20.00%                                  | 2.09 (1.81, 2.42) | 0.000                                | 49.8               | 0.21 (0.17, 0.26) | 0.000                                | 71.0               |
| 28d or 30d mortality                | 17             | 1161                | 2463                | 42.85%                                | 19.88%                                  | 2.23 (1.83, 2.72) | 0.000                                | 63.6               | 0.23 (0.15, 0.30) | 0.000                                | 79.1               |
| 21d mortality                       | 1              | 161                 | 117                 | 52.20%                                | 14.50%                                  | 3.59 (2.26, 5.71) | 0.000                                | -                  | 0.38 (0.28, 0.48) | 0.000                                | -                  |
| 14d mortality                       | 4              | 84                  | 287                 | 45.09%                                | 27.01%                                  | 1.70 (1.24, 2.35) | 0.001                                | 0.0                | 0.18 (0.06, 0.31) | 0.003                                | 0.0                |
| 6d or 7d mortality                  | 3              | 149                 | 372                 | 25.90%                                | 6.57%                                   | 3.68 (2.32, 5.83) | 0.000                                | 0.0                | 0.18 (0.11, 0.26) | 0.000                                | 0.0                |
| Mortality attributable to infection | 8              | 391                 | 778                 | 43.30%                                | 17.45%                                  | 2.74 (1.97, 3.81) | 0.000                                | 58.3               | 0.27 (0.15, 0.38) | 0.000                                | 79.5               |
| Mortality in ICU                    | 4              | 1035                | 824                 | 58.83%                                | 50.50%                                  | 1.17 (1.08, 1.28) | 0.000                                | 0.0                | 0.09 (0.04, 0.14) | 0.000                                | 0.0                |
| 30d mortality in ICU                | 1              | 244                 | 263                 | 28.90%                                | 11.00%                                  | 2.60 (1.75, 3.87) | 0.000                                | -                  | 0.18 (0.11, 0.25) | 0.000                                | -                  |

## DISCUSSION

This study systematically reviewed 50 studies and provides a comprehensive analysis of the impact of carbapenem resistance on mortality among patients infected with *Enterobacteriaceae*. Our analysis suggests that, for any type of mortality outcome, carbapenem resistance was associated with a greater probability of death for patients infected with CRE than that for patients infected with CSE. The results are consistent with the direction of previous meta-analyses of the association between carbapenem resistance and mortality among patients infected with *Enterobacteriaceae*.<sup>13,14</sup>

As for the risk factors for worse mortality outcomes in patients with CRE infections, previous studies usually explained higher mortality among patients with CRE infection as being due to patient-, infection-, treatment-, and organism-related factors.<sup>13,14,16,80</sup> Twenty studies included in this review conducted multivariate analyses to identify the risk factors for mortality among patients infected with *Enterobacteriaceae*. After controlling for patient-related factors like age, sex, the severity of underlying illness, and comorbidities, three studies<sup>47,51,67</sup> found that carbapenem resistance was not associated with increased mortality risk; however, 14 studies found that carbapenem resistance remained an independent predictor of mortality. Previous studies also considered therapeutic interventions as important risk factors for increased mortality in CRE infection, as administration of initial antibiotic therapy with in-vitro activity is more likely to be delayed in patients with CRE infection.<sup>32,33,40,59,62,67,74</sup> Several studies included in this research have suggested that the effect of carbapenem resistance was probably mediated by inappropriate initial therapy.<sup>40,51,37</sup> This finding was supported by a recent review of 11 studies that used a meta-regression analysis to identify a significant association between the proportion of patients who received appropriate initial antibiotic therapy and mortality.<sup>16</sup> However, nine studies included in our review<sup>32,38,41,47,62,67,71,73,74</sup> did not identify an association between early appropriate antibiotic therapy and

1  
2  
3  
4 mortality after adjustment for some confounding factors. Instead, some studies found that other treatment  
5  
6 methods were important risk factors of mortality. For example, a recent meta-analysis including seven  
7  
8 studies showed that monotherapy treatment was associated with significantly higher mortality than  
9  
10 combination therapy for patients with CRE infections.<sup>14</sup> In addition, some studies<sup>72,73</sup> have suggested that  
11  
12 other therapies, such as adjunctive therapy, tigecycline therapy, and the use of aminoglycoside, may be  
13  
14 associated with mortality among patients infected with *Klebsiella pneumoniae*. The increased mortality  
15  
16 among patients with CRE infections might also be related to the increased virulence of  
17  
18 carbapenemase-producing strains. Two studies included in this meta-analysis showed that isolation of the  
19  
20 KPC-positive strain was a predictor of mortality among patients infected with *Klebsiella pneumoniae*  
21  
22 independent of the appropriateness of initial treatment and patient characteristics,<sup>41,55</sup> while another study<sup>47</sup>  
23  
24 found that KPC-positive status was not associated with mortality when the virulence score was included in  
25  
26 the multivariate analysis. As most of the included studies we reviewed did not provide the mortality  
27  
28 outcomes after adjusting for confounding factors, we did not calculate the pooled adjusted effect measures.  
29  
30  
31  
32  
33  
34  
35  
36

37  
38 To investigate the heterogeneity across the studies, we performed stratified analysis and  
39  
40 meta-regression based on the type of mortality outcome. In terms of RR, the meta-regression analysis for  
41  
42 in-hospital mortality showed that the effect of carbapenem resistance on in-hospital mortality was greater  
43  
44 in studies published in 2017-2020 than it was in studies published in 2011-2013 and 2014-2016. The  
45  
46 statistical test and meta-regression analyses for 28-day and 30-day mortality showed similar results. The  
47  
48 increasing effect of carbapenem resistance on mortality with the publication year could be explained by the  
49  
50 increasingly limited availability of effective antibiotics and the development of carbapenem-resistant  
51  
52 *Enterobacteriaceae* against some key antibiotics, such as colistin,<sup>81</sup> resulting in increasing difficulty in  
53  
54 treating CRE infection. As one study showed,<sup>16</sup> the proportion of CRKP patients who received appropriate  
55  
56  
57  
58  
59  
60

1  
2  
3  
4 initial antibiotic therapy did not change over time. In contrast, mortality from CSE infection has tended to  
5  
6 decrease in recent years, and the unweighted mean of in-hospital mortality and 28-day and 30-day  
7  
8 mortality among CSE patients in studies conducted from 2017-2020 is 11.69% and 13.43% respectively,  
9  
10 the lowest of the studies we reviewed. This change could be due to the development of medical technology  
11  
12 and medical treatment, which may enlarge the relative differences in mortality between CRE and CSE  
13  
14 infections. In addition, the statistical test for mortality attributable to infection identified a significant  
15  
16 difference between infection types, as carbapenem resistance in patients with neurosurgical infection had a  
17  
18 significantly greater effect on mortality compared to other types of infection, perhaps because of difficulty  
19  
20 in treating CRE meningitis/encephalitis in neurosurgery.<sup>74</sup> In terms of the RR, the statistical test showed  
21  
22 that, compared with studies with fewer than 100 patients, carbapenem resistance had a greater effect on  
23  
24 28-day and 30-day mortality in studies with 100-200 patients, indicating that the absolute risk difference of  
25  
26 mortality between CRE and CSE infection tends to be more stable with larger sample size.  
27  
28  
29  
30  
31  
32  
33  
34

35 To our knowledge, this study offers the most comprehensive meta-analysis so far of the impact of  
36  
37 carbapenem resistance on mortality among patients infected with *Enterobacteriaceae*. Nearly 20 new  
38  
39 studies published in the last three years have been included in our study. In addition, the meta-analysis was  
40  
41 conducted in different groups of mortality outcomes, which may help address the potential heterogeneity  
42  
43 caused by mortality measurements. Moreover, this review is the first to explore the source of heterogeneity  
44  
45 among studies using statistical tests and meta-regression analyses of variables related to countries'  
46  
47 economic status and geographical region. Moreover, this is the first review to explore the source of  
48  
49 heterogeneity across studies using statistical tests and meta-regression analysis of potential variables and to  
50  
51 consider the country's economic status and geographical region in assessing the association between  
52  
53 carbapenem resistance and mortality among patients infected with *Enterobacteriaceae*  
54  
55  
56  
57  
58  
59  
60

1  
2  
3  
4 Our study also has several limitations. Firstly, among studies focusing on specific pathogens, we only  
5  
6 included studies that focused on two clinically important *Enterobacteriaceae* species, *Klebsiella*  
7  
8 *pneumoniae* and *Escherichia coli*. Secondly, we only included studies published in English. Thirdly, we  
9  
10 only calculated the unadjusted results, so many confounding factors, such as patients' health conditions  
11  
12 and therapy options, were not adjusted in the analysis because of data limitations. In addition, we were  
13  
14 unable to conduct the stratified analysis and meta-regression for all kinds of mortality measurements  
15  
16 because of insufficient data. Finally, the comparison in our research is currently limited to high-income  
17  
18 and upper-middle-income countries from the Americas, Asia, and Europe due to insufficient data. More  
19  
20 studies from different countries, especially low-income countries and other regions, are needed to provide  
21  
22 comprehensive data for further analysis stratified by geographical region and economic status.  
23  
24  
25  
26  
27  
28  
29

30 Our findings reinforced previous results regarding the positive effect of carbapenem resistance on  
31  
32 mortality for patients infected with *Enterobacteriaceae*. These findings implied that patients with CRE  
33  
34 infection still face a greater risk of death compared with patients with CSE infection. Furthermore, this  
35  
36 study has identified an increasing effect of carbapenem resistance on mortality over time especially for  
37  
38 28d-30d mortality, which may reflect the difficulty of the CRE infection treatment in clinical practice and  
39  
40 emphasizes the urgent need to develop new antibiotics and appropriate treatment to reduce the death risk.  
41  
42 Our results also suggested that patients with neurosurgical infection were at greater risk of attributable  
43  
44 death that was due to CRE infection than other types of infection. Thus, more attention should be paid to  
45  
46 CRE infection in patients with neurosurgery in clinical practice. In addition, no significant differences in  
47  
48 the effect of carbapenem resistance on mortality for different geographical regions and economic status  
49  
50 were observed in our study, which may result from the limited data. The comparison in our research is  
51  
52 currently limited to high-income and upper-middle-income countries from the Americas, Asia, and Europe  
53  
54  
55  
56  
57  
58  
59  
60

1  
2  
3  
4 due to insufficient data. More studies from different countries, especially low-income countries, are needed  
5  
6 to provide comprehensive data for further analysis stratified by geographical region and economic status.  
7  
8  
9

## 10 11 12 **CONCLUSIONS**

13  
14 Our results indicate that patients with CRE infection still face a greater risk of death than patients with  
15  
16 CSE infection do, and an urgent need to develop new antibiotics and appropriate treatment to reduce the  
17  
18 death risk. Future studies should address additional countries to provide comprehensive data and sound  
19  
20 evidence from which to draw resources to fight CRE-related mortality and suggest the way forward to  
21  
22 alleviate its implications.  
23  
24  
25  
26  
27  
28  
29  
30  
31  
32  
33  
34  
35  
36  
37  
38  
39  
40  
41  
42  
43  
44  
45  
46  
47  
48  
49  
50  
51  
52  
53  
54  
55  
56  
57  
58  
59  
60

1  
2  
3  
4 **Contributors** All authors were involved in the design and development of the study. The review was  
5  
6 designed by XF, RZ (Rong Zhang), RZ (Ruyin Zhou), JL, JS, TRW, and YW. The literature search in  
7  
8 electronic databases was conducted by JZ, SS, SC and XZ. RZ (Ruyin Zhou) and JZ screened all studies  
9  
10 for inclusion into the systematic review and performed the assessments of risk bias for all studies with the  
11  
12 assistance of XZ, SS, SC, and XF. RZ (Ruyin Zhou) and JZ performed data extraction. RZ (Ruyin Zhou)  
13  
14 and JZ conducted data analysis and interpretation with assistance of XZ, SS, SC, and XF. RZ (Ruyin Zhou)  
15  
16 drafted the manuscript and YS, ZL, JL, RZ (Rong Zhang), JS, TRW, YW, XF revised it critically for  
17  
18 important intellectual content. All authors contributed to drafting and revision of the article and have  
19  
20 reviewed the results and approved the final version of the manuscript.  
21  
22

23 **Competing interests** None declared.  
24  
25  
26

27 **Funding** This work was supported by the National Natural Science Foundation of China (NSFC) (Grant  
28  
29 numbers 81861138051, 81861138052 and 81861138053).  
30  
31  
32

33 **Data availability statement** Data sharing not applicable because all data relevant to the study are included  
34  
35 in the article or uploaded as supplementary information.  
36  
37  
38  
39  
40

41 **Ethics Statement** This study does not involve human participants or animal subjects.  
42  
43  
44  
45  
46  
47  
48  
49  
50  
51  
52  
53  
54  
55  
56  
57  
58  
59  
60

## REFERENCES

1. Center for Disease Control and Prevention(US). Clinicians: Information about CRE, 2019. Available: <https://www.cdc.gov/hai/organisms/cre/cre-clinicians.html>[accessed 19 Dec 2020].
2. Birnbaum J, Kahan FM, Kropp H, *et al*. Carbapenems, a new class of beta-lactam antibiotics: discovery and development of imipenem/cilastatin. *Am J Med* 1985;78:3-21.
3. Paterson DL, Ko W-C, Von Gottberg A, *et al*. Antibiotic Therapy for Klebsiella pneumoniae Bacteremia: Implications of Production of Extended-Spectrum  $\beta$ -Lactamases. *Clin Infect Dis* 2004;39:31-7. doi: 10.1086/420816. [Epub ahead of print: 08 Jun 2004].
4. Osano E, Arakawa Y, Wacharotayankun R, *et al*. Molecular characterization of an enterobacterial metallo beta-lactamase found in a clinical isolate of Serratia marcescens that shows imipenem resistance. *Antimicrob Agents Chemother* 1994;38:71-8.
5. Lauretti L, Riccio ML, Mazzariol A, *et al*. Cloning and characterization of bla VIM, a new integron-borne metallo- $\beta$ -lactamase gene from a Pseudomonas aeruginosa clinical isolate. *Antimicrob Agents Chemother* 1999;43:1584-90.
6. Yigit H, Queenan AM, Anderson GJ, *et al*. Novel carbapenem-hydrolyzing  $\beta$ -lactamase, KPC-1, from a carbapenem-resistant strain of Klebsiella pneumoniae. *Antimicrob Agents Chemother* 2001;45:1151-61
7. Iovleva A, Doi Y. Carbapenem-Resistant Enterobacteriaceae. *Clin Lab Med* 2017;37:303-315. doi: 10.1016/j.cll.2017.01.005. [Epub ahead of print: 11 Mar 2017].
8. Logan LK, Weinstein RA. The Epidemiology of Carbapenem-Resistant Enterobacteriaceae: The Impact and Evolution of a Global Menace. *J Infect Dis* 2017;215(suppl\_1):S28-S36
9. European Centre for Disease Control and Prevention. Antimicrobial resistance surveillance in Europe 2018, 2019. Available: <https://www.ecdc.europa.eu/en/publications-data/surveillance-antimicrobial-resistance-europe-2018>[accessed 19 Dec 2020].
10. World Health Organization. Global priority list of antibiotic-resistant bacteria to guide research, discovery, and development of new antibiotics, 2017. Available: <https://www.who.int/medicines/publications/global-priority-list-antibiotic-resistant-bacteria/en/>[accessed 19 Dec 2020].
11. Budhram DR, Mac S, Bielecki JM, *et al*. Health outcomes attributable to carbapenemase-producing Enterobacteriaceae infections: A systematic review and meta-analysis. *Infect Control Hosp Epidemiol* 2020;41:37-43. doi: 10.1017/ice.2019.282. [Epub ahead of print: 22 Oct 2019].
12. Soontaros S, Leelakanok N. Association between carbapenem-resistant Enterobacteriaceae and death: A systematic review and meta-analysis. *Am J Infect Control* 2019;47:1200-1212. doi: 10.1016/j.ajic.2019.03.020. [Epub ahead of print: 7 May 2019].
13. Martin A, Fahrbach K, Zhao Q, *et al*. Association Between Carbapenem Resistance and Mortality Among Adult, Hospitalized Patients With Serious Infections Due to Enterobacteriaceae: Results of a Systematic Literature Review and Meta-analysis. *Open Forum Infect Dis* 2018;5:ofy150.
14. Xu L, Sun X, Ma X. Systematic review and meta-analysis of mortality of patients infected with carbapenem-resistant Klebsiella pneumoniae. *Ann Clin Microbiol Antimicrob* 2017;16:18.
15. Kohler PP, Volling C, Green K, *et al*. Carbapenem Resistance, Initial Antibiotic Therapy, and Mortality in Klebsiella pneumoniae Bacteremia: A Systematic Review and Meta-Analysis. *Infect*



- 1  
2  
3  
4  
5  
6  
7  
8  
9  
10  
11  
12  
13  
14  
15  
16  
17  
18  
19  
20  
21  
22  
23  
24  
25  
26  
27  
28  
29  
30  
31  
32  
33  
34  
35  
36  
37  
38  
39  
40  
41  
42  
43  
44  
45  
46  
47  
48  
49  
50  
51  
52  
53  
54  
55  
56  
57  
58  
59  
60
- Control Hosp Epidemiol* 2017;38:1319-1328. doi: 10.1017/ice.2017.197. [Epub ahead of print: 27 Sep 2017].
16. Falagas ME, Tensarli GS, Karageorgopoulos DE, *et al.* Deaths Attributable to Carbapenem-Resistant Enterobacteriaceae Infections. *Emerg Infect Dis* 2014;20:1170-5.
17. Laxminarayan R, Heymann DL. Challenges of drug resistance in the developing world. *BMJ* 2012;344:e1567.
18. Ramos-Castaneda JA, Ruano-Ravina A, Barbosa-Lorenzo R, *et al.* Mortality due to KPC carbapenemase-producing *Klebsiella pneumoniae* infections: Systematic review and meta-analysis: Mortality due to KPC *Klebsiella pneumoniae* infections. *J Infect* 2018;76:438-448. doi: 10.1016/j.jinf.2018.02.007. [Epub ahead of print: 01 Mar 2018].
19. Higgins JPT, Green S. Cochrane handbook for systematic reviews of interventions. Version 5.1.0. [updated March 2011]. London: Cochrane Collaboration; 2011. Available: [https:// handbook -5 -1 .cochrane .org/](https://handbook-5-1.cochrane.org/)[accessed 19 Dec 2020].
20. Moher D, Liberati A, Tetzlaff J, *et al.* Preferred Reporting Items for Systematic Reviews and Meta-Analyses: The PRISMA Statement. *BMJ* 2009;339:b2535.
21. Suay-Garcia B, Perez-Gracia MT. Present and Future of Carbapenem-resistant Enterobacteriaceae (CRE) Infections. *Antibiotics (Basel)* 2019;8:122.
22. World Bank. World bank country and lending groups[Internet]. Data, 2019. Available: <https://datahelpdesk.worldbank.org/knowledgebase/articles/906519-world-bank-country-and-lending-groups> [Accessed 20 Jun 2020].
23. Sinclair JC, Bracken MB. Clinically useful measures of effect in binary analyses of randomized trials. *J Clin Epidemiol* 1994;47(8):881-9.
24. Sackett DL, Deeks JJ, Altman DG. Down with odds ratios! *BMJ Evid Based Med* 1996; 1: 164-166.
25. Schmidt CO, Kohlmann T. When to use the odds ratio or the relative risk? *Int J Public Health* 2008;53:165-7.
26. Noordzij M, van Diepen M, Caskey FC, *et al.* Relative risk versus absolute risk: one cannot be interpreted without the other. *Nephrology, Dialysis, Transplantation : Official Publication of the European Dialysis and Transplant Association - European Renal Association*. 2017 Apr;32(suppl\_2).
27. Schulz KF, Altman DG, Moher D; CONSORT Group. CONSORT 2010 statement: updated guidelines for reporting parallel group randomised trials. *Int J Surg*. 2011;9(8):672-7. doi: 10.1016/j.ijsu.2011.09.004. Epub 2011 Oct 13.
28. DerSimonian R, Laird N. Meta-analysis in clinical trials. *Control Clin Trials*. 1986 Sep;7(3):177-88. doi: 10.1016/0197-2456(86)90046-2.
29. Wells GA, Shea B, O'Connell D, *et al.* The Newcastle-Ottawa Scale (NOS) for assessing the quality of nonrandomised studies in meta-analyses. Ottawa: Ottawa Hospital Research Institute; 2014.
30. Alicino C, Giacobbe DR, Orsi A, *et al.* Trends in the annual incidence of carbapenem-resistant *Klebsiella pneumoniae* bloodstream infections: a 8-year retrospective study in a large teaching hospital in northern Italy. *BMC Infect Dis* 2015;15:415.
31. Balkhair A, Al-Muharrmi Z, Al'Adawi B, *et al.* Prevalence and 30-day all-cause mortality of carbapenem-and colistin-resistant bacteraemia caused by *Acinetobacter baumannii*, *Pseudomonas*

- aeruginosa, and *Klebsiella pneumoniae*: Description of a decade-long trend. *Int J Infect Dis* 2019;85:10-15. doi: 10.1016/j.ijid.2019.05.004. [Epub ahead of print: 14 May 2019].
32. Ben-David D, Kordevani R, Keller N, *et al.* Outcome of carbapenem resistant *Klebsiella pneumoniae* bloodstream infections. *Clin Microbiol Infect* 2012;18:54-60. doi: 10.1111/j.1469-0691.2011.03478.x. [Epub ahead of print: 01 Jul 2011].
33. Brizendine KD, Richter SS, Cober ED, *et al.* Carbapenem-resistant *Klebsiella pneumoniae* urinary tract infection following solid organ transplantation. *Antimicrob Agents Chemother* 2015;59:553-7. doi: 10.1128/AAC.04284-14. [Epub ahead of print: 10 Nov 2014].
34. Chang H, Wei J, Zhou W, *et al.* Risk factors and mortality for patients with Bloodstream infections of *Klebsiella pneumoniae* during 2014-2018: Clinical impact of carbapenem resistance in a large tertiary hospital of China. *J Infect Public Health* 2020;13:784-790. doi: 10.1016/j.jiph.2019.11.014. [Epub ahead of print: 13 Dec 2019].
35. Chang HJ, Hsu PC, Yang CC, *et al.* Risk factors and outcomes of carbapenem-nonsusceptible *Escherichia coli* bacteremia: A matched case-control study. *J Microbiol Immunol Infect* 2011;44:125-30. doi: 10.1016/j.jmii.2010.06.001. [Epub ahead of print: 14 Jan 2011].
36. Chiotos K, Tamma PD, Flett KB, *et al.* Increased 30-day mortality associated with carbapenem-resistant Enterobacteriaceae in children. *Open Forum Infect Dis* 2018;5:ofy222.
37. Cienfuegos-Gallet AV, Ocampo de Los Rios AM, Sierra Viana P, *et al.* Risk factors and survival of patients infected with carbapenem-resistant *Klebsiella pneumoniae* in a KPC endemic setting: a case-control and cohort study. *BMC Infect Dis* 2019;19:830.
38. Correa L, Martino MD, Siqueira I, *et al.* A hospital-based matched case-control study to identify clinical outcome and risk factors associated with carbapenem-resistant *Klebsiella pneumoniae* infection. *BMC Infect Dis* 2013;13:80.
39. Cubero M, Cuervo G, Dominguez Mn, *et al.* Carbapenem-resistant and carbapenem-susceptible isogenic isolates of *Klebsiella pneumoniae* ST101 causing infection in a tertiary hospital. *BMC Microbiol* 2015;15:177.
40. Daikos GL, Petrikkos P, Psychogiou M, *et al.* Prospective observational study of the impact of VIM-1 metallo- $\beta$ -lactamase on the outcome of patients with *Klebsiella pneumoniae* bloodstream infections. *Antimicrob Agents Chemother* 2009;53:1868-73. doi: 10.1128/AAC.00782-08. [Epub ahead of print: 17 Feb 2009].
41. Fraenkel-Wandel Y, Raveh-Brawer D, Wiener-Well Y, *et al.* Mortality due to blaKPC*Klebsiella pneumoniae* bacteraemia. *J Antimicrob Chemother* 2016;71:1083-7. doi: 10.1093/jac/dkv414. [Epub ahead of print: 11 Dec 2015].
42. Gallagher JC, Kuriakose S, Haynes K, *et al.* Case-Case-Control Study of Patients with Carbapenem-Resistant and Third-Generation-Cephalosporin-Resistant *Klebsiella pneumoniae* Bloodstream Infections. *Antimicrob Agents Chemother* 2014;58:5732-5. doi: 10.1128/AAC.03564-14. [Epub ahead of print: 14 Jul 2014].
43. Garbati MA, Sakkijha H, Abushaheen A. Infections due to Carbapenem Resistant Enterobacteriaceae among Saudi Arabian Hospitalized Patients: A Matched Case-Control Study. *Biomed Res Int* 2016;2016:3961684. doi: 10.1155/2016/3961684. [Epub ahead of print: 06 Apr 2016].
44. Gomez Rueda V, Zuleta Tobon JJ. Risk factors for infection with carbapenem-resistant *Klebsiella pneumoniae*: a case-case-control study. *Colomb Med (Cali)* 2014;45:54-60.

- 1  
2  
3  
4  
5  
6  
7  
8  
9  
10  
11  
12  
13  
14  
15  
16  
17  
18  
19  
20  
21  
22  
23  
24  
25  
26  
27  
28  
29  
30  
31  
32  
33  
34  
35  
36  
37  
38  
39  
40  
41  
42  
43  
44  
45  
46  
47  
48  
49  
50  
51  
52  
53  
54  
55  
56  
57  
58  
59  
60
45. Hoxha A, Karki T, Giambi C, *et al.* Attributable mortality of carbapenem-resistant *Klebsiella pneumoniae* infections in a prospective matched cohort study in Italy, 2012-2013. *J Hosp Infect* 2016;92:61-6. doi: 10.1016/j.jhin.2015.06.018. [Epub ahead of print: 29 Jul 2015].
  46. Huang W, Qiao F, Zhang Y, *et al.* In-hospital Medical Costs of Infections Caused by Carbapenem-resistant *Klebsiella pneumoniae*. *Clin Infect Dis* 2018;67(suppl\_2):S225-S230.
  47. Hussein K, Raz-Pasteur A, Finkelstein R, *et al.* Impact of carbapenem resistance on the outcome of patients' hospital-acquired bacteraemia caused by *Klebsiella pneumoniae*. *J Hosp Infect* 2013;83:307-13. doi: 10.1016/j.jhin.2012.10.012. [Epub ahead of print: 10 Jan 2013].
  48. Kotb S, Lyman M, Ismail G, *et al.* Epidemiology of Carbapenem-resistant Enterobacteriaceae in Egyptian intensive care units using National Healthcare-associated Infections Surveillance Data, 2011-2017. *Antimicrob Resist Infect Control* 2020;9:2.
  49. Lee HJ, Choi JK, Cho SY, *et al.* Carbapenem-resistant Enterobacteriaceae: Prevalence and Risk Factors in a Single Community-Based Hospital in Korea. *Infect Chemother* 2016;48:166-173. doi: 10.3947/ic.2016.48.3.166. [Epub ahead of print: 08 Sep 2016].
  50. Li Y, Shen H, Zhu C, *et al.* Carbapenem-resistant *klebsiella pneumoniae* infections among ICU admission patients in Central China: prevalence and prediction model. *Biomed Res Int* 2019;2019:9767313.
  51. Liu J, Wang H, Huang Z, *et al.* Risk factors and outcomes for carbapenem-resistant *Klebsiella pneumoniae* bacteremia in onco-hematological patients. *J Infect Dev Ctries* 2019;13:357-364.
  52. Liu SW, Chang HJ, Chia JH, *et al.* Outcomes and characteristics of ertapenem-nonsusceptible *Klebsiella pneumoniae* bacteremia at a university hospital in Northern Taiwan: a matched case-control study. *J Microbiol Immunol Infect* 2012;45:113-9. doi: 10.1016/j.jmii.2011.09.026. [Epub ahead of print: 11 Dec 2011].
  53. McLaughlin MM, Advincula MR, Malczynski M, *et al.* Quantifying the clinical virulence of *Klebsiella pneumoniae* producing carbapenemase *Klebsiella pneumoniae* with a *Galleria mellonella* model and a pilot study to translate to patient outcomes. *BMC Infect Dis* 2014;14:31.
  54. Meng X, Liu S, Duan J, *et al.* Risk factors and medical costs for healthcare-associated carbapenem-resistant *Escherichia coli* infection among hospitalized patients in a Chinese teaching hospital. *BMC Infect Dis* 2017;17:82.
  55. Mouloudi E, Protonotariou E, Zagorianou A, *et al.* Bloodstream Infections Caused by Metallo-beta-Lactamase/*Klebsiella pneumoniae* Carbapenemase-Producing *K. pneumoniae* among Intensive Care Unit Patients in Greece: Risk Factors for Infection and Impact of Type of Resistance on Outcomes. *Infect Control Hosp Epidemiol* 2010;31:1250-6. doi: 10.1086/657135. [Epub ahead of print: 25 Oct 2010].
  56. Ny P, Nieberg P, Wong-Beringer A. Impact of carbapenem resistance on epidemiology and outcomes of nonbacteremic *Klebsiella pneumoniae* infections. *Am J Infect Control* 2015;43:1076-80. doi: 10.1016/j.ajic.2015.06.008. [Epub ahead of print: 17 Jul 2015].
  57. Orsi GB, Bencardino A, Vena A, *et al.* Patient risk factors for outer membrane permeability and KPC-producing carbapenem-resistant *Klebsiella pneumoniae* isolation: results of a double case-control study. *Infection*. 2013 Feb;41(1):61-7. doi: 10.1007/s15010-012-0354-2. [Epub ahead of print: 16 Oct 2012].
  58. Pan H, Lou Y, Zeng L, *et al.* Infections caused by carbapenemase-producing *klebsiella pneumoniae*: Microbiological characteristics and risk factors. *Microb Drug Resist* 2019;25:287-296. doi: 10.1089/mdr.2018.0339. [Epub ahead of print: 27 Feb 2019].

- 1  
2  
3  
4 59. Patel G, Huprikar S, Factor SH, *et al*. Outcomes of carbapenem-resistant *Klebsiella pneumoniae*  
5 infection and the impact of antimicrobial and adjunctive therapies. *Infect Control Hosp Epidemiol*  
6 2008;29:1099-106.
- 7  
8 60. Pereira MR, Scully BF, Pouch SM, *et al*. Risk factors and outcomes of carbapenem-resistant  
9 *Klebsiella pneumoniae* infections in liver transplant recipients. *Liver Transpl* 2015;21:1511-9.
- 10  
11 61. Pouch SM, Kubin CJ, Satlin MJ, *et al*. Epidemiology and outcomes of carbapenem-resistant  
12 *Klebsiella pneumoniae* bacteriuria in kidney transplant recipients. *Transpl Infect Dis*  
13 2015;17:800-9. doi: 10.1111/tid.12450. [Epub ahead of print: 05 Nov 2015].
- 14  
15 62. Qureshi ZA, Paterson DL, Peleg AY, *et al*. Clinical characteristics of bacteraemia caused by  
16 extended-spectrum  $\beta$ -lactamase-producing Enterobacteriaceae in the era of CTX-M-type and  
17 KPC-type  $\beta$ -lactamases. *Clin Microbiol Infect* 2012;18:887-93. doi:  
18 10.1111/j.1469-0691.2011.03658.x. [Epub ahead of print: 26 Sep 2011].
- 19  
20 63. Sánchez-Romero I, Asensio Á, Oteo J, *et al*. Nosocomial outbreak of VIM-1-producing *Klebsiella*  
21 *pneumoniae* isolates of multilocus sequence type 15: molecular basis, clinical risk factors, and  
22 outcome. *Antimicrob Agents Chemother* 2012;56:420-7. doi: 10.1128/AAC.05036-11. [Epub  
23 ahead of print: 17 Oct 2011].
- 24  
25 64. Schwaber MJ, Klarfeld-Lidji S, Navon-Venezia S, *et al*. Predictors of carbapenem-resistant  
26 *Klebsiella pneumoniae* acquisition among hospitalized adults and effect of acquisition on  
27 mortality. *Antimicrob Agents Chemother* 2008;52:1028-33. doi: 10.1128/AAC.01020-07. [Epub  
28 ahead of print: 17 Dec 2007].
- 29  
30 65. Shilo S, Assous MV, Lachish T, *et al*. Risk factors for bacteriuria with carbapenem-resistant  
31 *Klebsiella pneumoniae* and its impact on mortality: a case-control study. *Infection* 2013;41:503-9.  
32 doi: 10.1007/s15010-012-0380-0. [Epub ahead of print: 28 Dec 2012].
- 33  
34 66. Simkins J, Muggia V, Cohen HW, *et al*. Carbapenem-resistant *Klebsiella pneumoniae* infections  
35 in kidney transplant recipients: a case-control study. *Transpl Infect Dis* 2014;16:775-82. doi:  
36 10.1111/tid.12276. [Epub ahead of print: 05 Aug 2014].
- 37  
38 67. Tian L, Tan R, Chen Y, *et al*. Epidemiology of *Klebsiella pneumoniae* bloodstream infections in a  
39 teaching hospital: factors related to the carbapenem resistance and patient mortality. *Antimicrob*  
40 *Resist Infect Control* 2016;5:48.
- 41  
42 68. Torres-Gonzalez P, Ortiz-Brizuela E, Cervera-Hernandez ME, *et al*. Associated factors and  
43 outcomes for OXA-232 Carbapenem-resistant Enterobacteriaceae infections in a tertiary care  
44 centre in Mexico City: A case-control-control study. *Diagn Microbiol Infect Dis* 2016;86:243-8.  
45 doi: 10.1016/j.diagmicrobio.2016.07.002. [Epub ahead of print: 07 Jul 2016].
- 46  
47 69. Trecarichi EM, Pagano L, Martino B, *et al*. Bloodstream infections caused by *Klebsiella*  
48 *pneumoniae* in onco-hematological patients: clinical impact of carbapenem resistance in a  
49 multicentre prospective survey. *Am J Hematol* 2016;91:1076-1081. doi: 10.1002/ajh.24489. [Epub  
50 ahead of print: 29 Jul 2016].
- 51  
52 70. Ulu AC, Kurtaran B, Inal AS, *et al*. Risk factors of carbapenem-resistant *Klebsiella pneumoniae*  
53 infection: a serious threat in ICUs. *Med Sci Monit* 2015;21:219-24.
- 54  
55 71. Vardakas KZ, Matthaïou DK, Falagas ME, *et al*. Characteristics, risk factors and outcomes of  
56 carbapenem-resistant *Klebsiella pneumoniae* infections in the intensive care unit. *J Infect*  
57 2015;70:592-9. doi: 10.1016/j.jinf.2014.11.003. [Epub ahead of print: 15 Nov 2014].
- 58  
59 72. Wang Z, Qin RR, Huang L, *et al*. Risk Factors for Carbapenem-resistant *Klebsiella pneumoniae*  
60 Infection and Mortality of *Klebsiella pneumoniae* Infection. *Chin Med J (Engl)* 2018;131:56-62.

- 1  
2  
3  
4  
5  
6  
7  
8  
9  
10  
11  
12  
13  
14  
15  
16  
17  
18  
19  
20  
21  
22  
23  
24  
25  
26  
27  
28  
29  
30  
31  
32  
33  
34  
35  
36  
37  
38  
39  
40  
41  
42  
43  
44  
45  
46  
47  
48  
49  
50  
51  
52  
53  
54  
55  
56  
57  
58  
59  
60
73. Xiao T, Yu W, Niu T, *et al.* A retrospective, comparative analysis of risk factors and outcomes in carbapenem-susceptible and carbapenem-nonsusceptible *Klebsiella pneumoniae* bloodstream infections: tigecycline significantly increases the mortality. *Infect Drug Resist* 2018;11:595-606.
74. Zhang Y, Guo LY, Song WQ, *et al.* Risk factors for carbapenem-resistant *K. pneumoniae* bloodstream infection and predictors of mortality in Chinese paediatric patients. *BMC Infect Dis* 2018;18:248.
75. Zheng S-H, Cao S-J, Xu H, *et al.* Risk factors, outcomes and genotypes of carbapenem-nonsusceptible *Klebsiella pneumoniae* bloodstream infection: a three-year retrospective study in a large tertiary hospital in Northern China. *Infect Dis (Lond)* 2018;50:443-451. doi: 10.1080/23744235.2017.1421772. [Epub ahead of print: 05 Jan 2018].
76. Zheng G, Jing L, Guojun Z, *et al.* Epidemiology and risk factors of neurosurgical bacterial meningitis/encephalitis induced by carbapenem resistant Enterobacteriaceae. *J Infect Chemother* 2020;26:101-106. doi: 10.1016/j.jiac.2019.07.023. [Epub ahead of print: 21 Aug 2019].
77. Zuo Y, Zhao D, Song G, *et al.* Risk Factors, Molecular Epidemiology, and Outcomes of Carbapenem-Resistant *Klebsiella pneumoniae* Infection for Hospital-Acquired Pneumonia: A Matched Case-Control Study in Eastern China During 2015–2017. *Microb Drug Resist* 2020. doi: 10.1089/mdr.2020.0162. [Epub ahead of print: 02 Jul 2020].
78. Villegas MV, Pallares CJ, Escandón-Vargas K, *et al.* Characterization and Clinical Impact of Bloodstream Infection Caused by Carbapenemase-Producing Enterobacteriaceae in Seven Latin American Countries. *PLoS One*. 2016 Apr 22;11(4):e0154092.
79. Stewardson AJ, Marimuthu K, Sengupta S, *et al.* Effect of carbapenem resistance on outcomes of bloodstream infection caused by Enterobacteriaceae in low-income and middle-income countries (PANORAMA): a multinational prospective cohort study. *Lancet Infect Dis*. 2019 Jun;19(6):601-610. Epub 2019 Apr 29.
80. Paño Pardo JR, Serrano Villar S, Ramos Ramos JC, *et al.* Infections caused by carbapenemase-producing Enterobacteriaceae: risk factors, clinical features and prognosis. *Enferm Infecc Microbiol Clin*. 2014 Dec;32 Suppl 4:41-8.
81. Sader HS, Castanheira M, Duncan LR, *et al.* Antimicrobial Susceptibility of Enterobacteriaceae and *Pseudomonas aeruginosa* Isolates from United States Medical Centers Stratified by Infection Type: Results from the International Network for Optimal Resistance Monitoring (INFORM) Surveillance Program, 2015-2016. *Diagn Microbiol Infect Dis*. 2018 Sep;92(1):69-74.

1  
2  
3  
4  
5  
6  
7  
8  
9  
10  
11  
12  
13  
14 **Figure legends**  
15  
16  
17  
18  
19

20 **Figure 1. Flow chart of the study selection process for the meta-analysis**  
21

22 **Figure 2. Forest plot of overall mortality in patients with carbapenem-resistant *Enterobacteriaceae***  
23 **(CRE) versus carbapenem-susceptible *Enterobacteriaceae* (CSE) infections (outcome**  
24 **measure = relative risk).**  
25  
26  
27  
28  
29

30 **Figure 3. Forest plot of overall mortality in patients with carbapenem-resistant *Enterobacteriaceae***  
31 **(CRE) versus carbapenem-susceptible *Enterobacteriaceae* (CSE) infections (outcome**  
32 **measure = risk difference).**  
33  
34  
35  
36  
37

38 **Figure 4. Funnel plot of studies evaluating mortality of patients with infections due to**  
39 **carbapenem-resistant compared to carbapenem-susceptible *Enterobacteriaceae*.**  
40  
41  
42  
43  
44  
45  
46  
47  
48  
49  
50  
51  
52  
53  
54  
55  
56  
57  
58  
59  
60



## Licence statement

I, the Submitting Author has the right to grant and does grant on behalf of all authors of the Work (as defined in the below author licence), an exclusive licence and/or a non-exclusive licence for contributions from authors who are: i) UK Crown employees; ii) where BMJ has agreed a CC-BY licence shall apply, and/or iii) in accordance with the terms applicable for US Federal Government officers or employees acting as part of their official duties; on a worldwide, perpetual, irrevocable, royalty-free basis to BMJ Publishing Group Ltd (“BMJ”) its licensees and where the relevant Journal is co-owned by BMJ to the co-owners of the Journal, to publish the Work in BMJ Open and any other BMJ products and to exploit all rights, as set out in our [licence](#).

The Submitting Author accepts and understands that any supply made under these terms is made by BMJ to the Submitting Author unless you are acting as an employee on behalf of your employer or a postgraduate student of an affiliated institution which is paying any applicable article publishing charge (“APC”) for Open Access articles. Where the Submitting Author wishes to make the Work available on an Open Access basis (and intends to pay the relevant APC), the terms of reuse of such Open Access shall be governed by a Creative Commons licence – details of these licences and which [Creative Commons](#) licence will apply to this Work are set out in our licence referred to above.

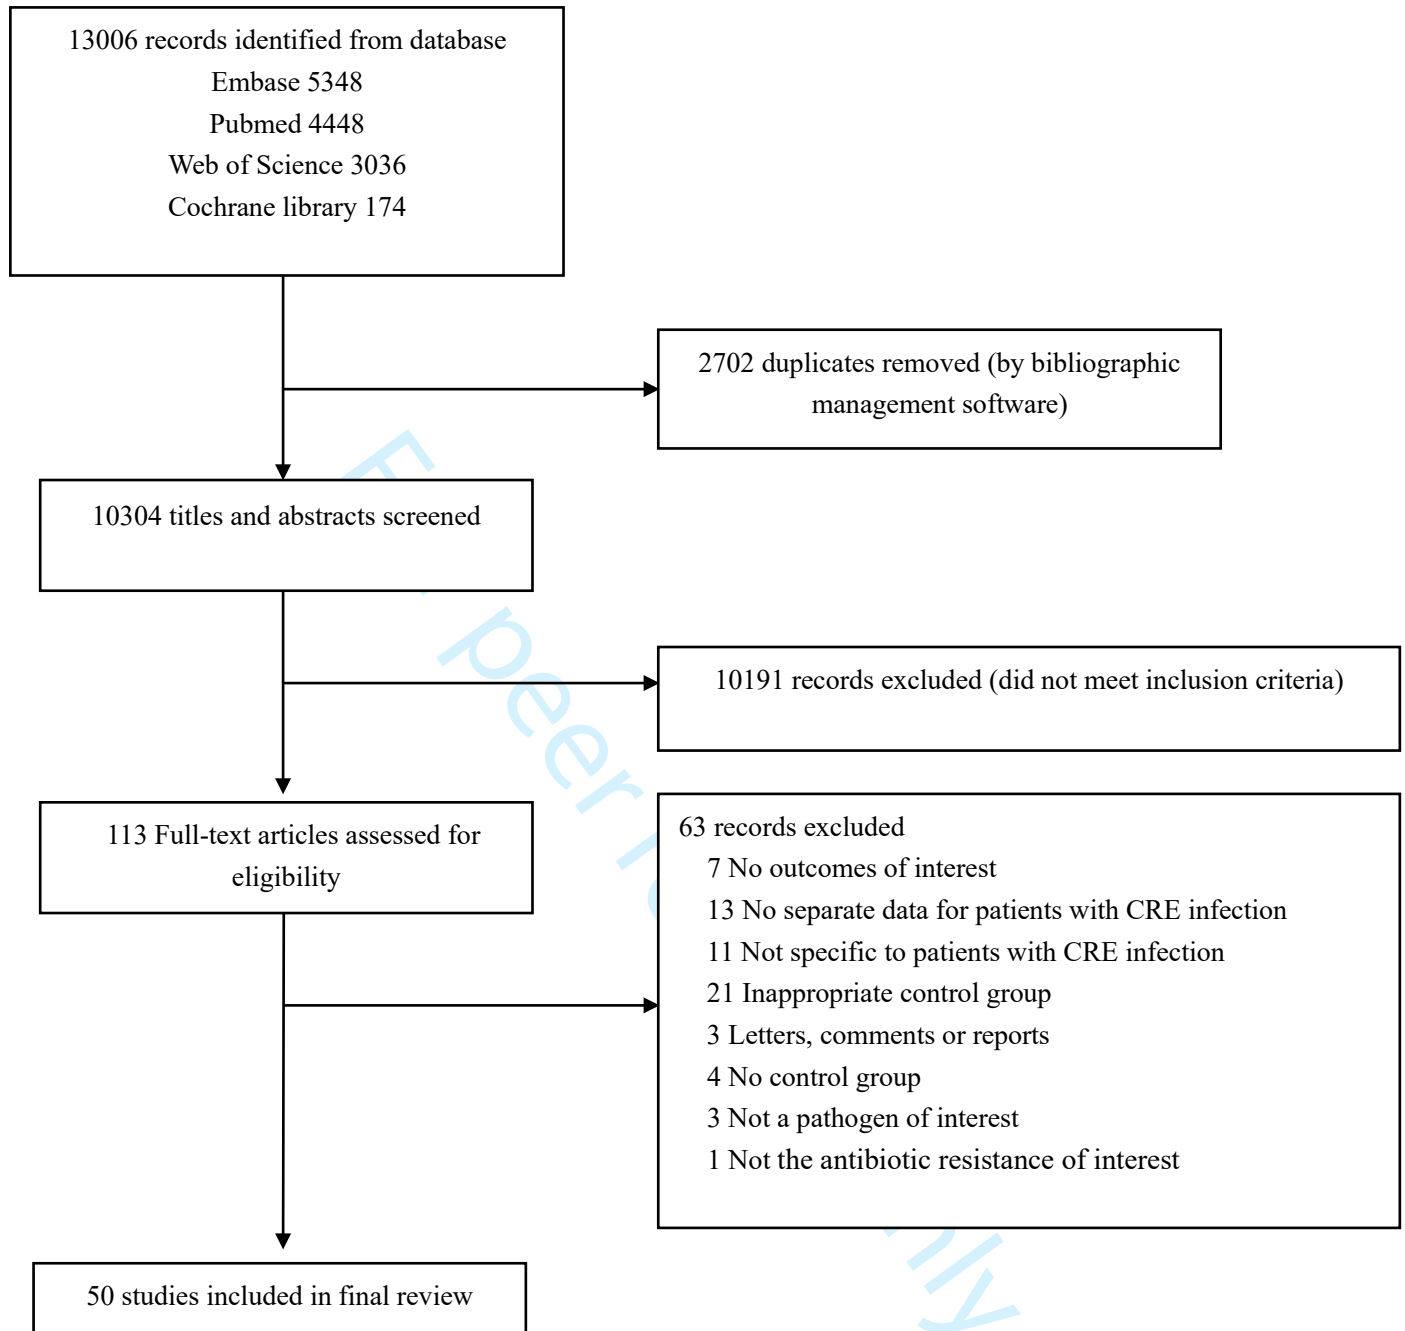



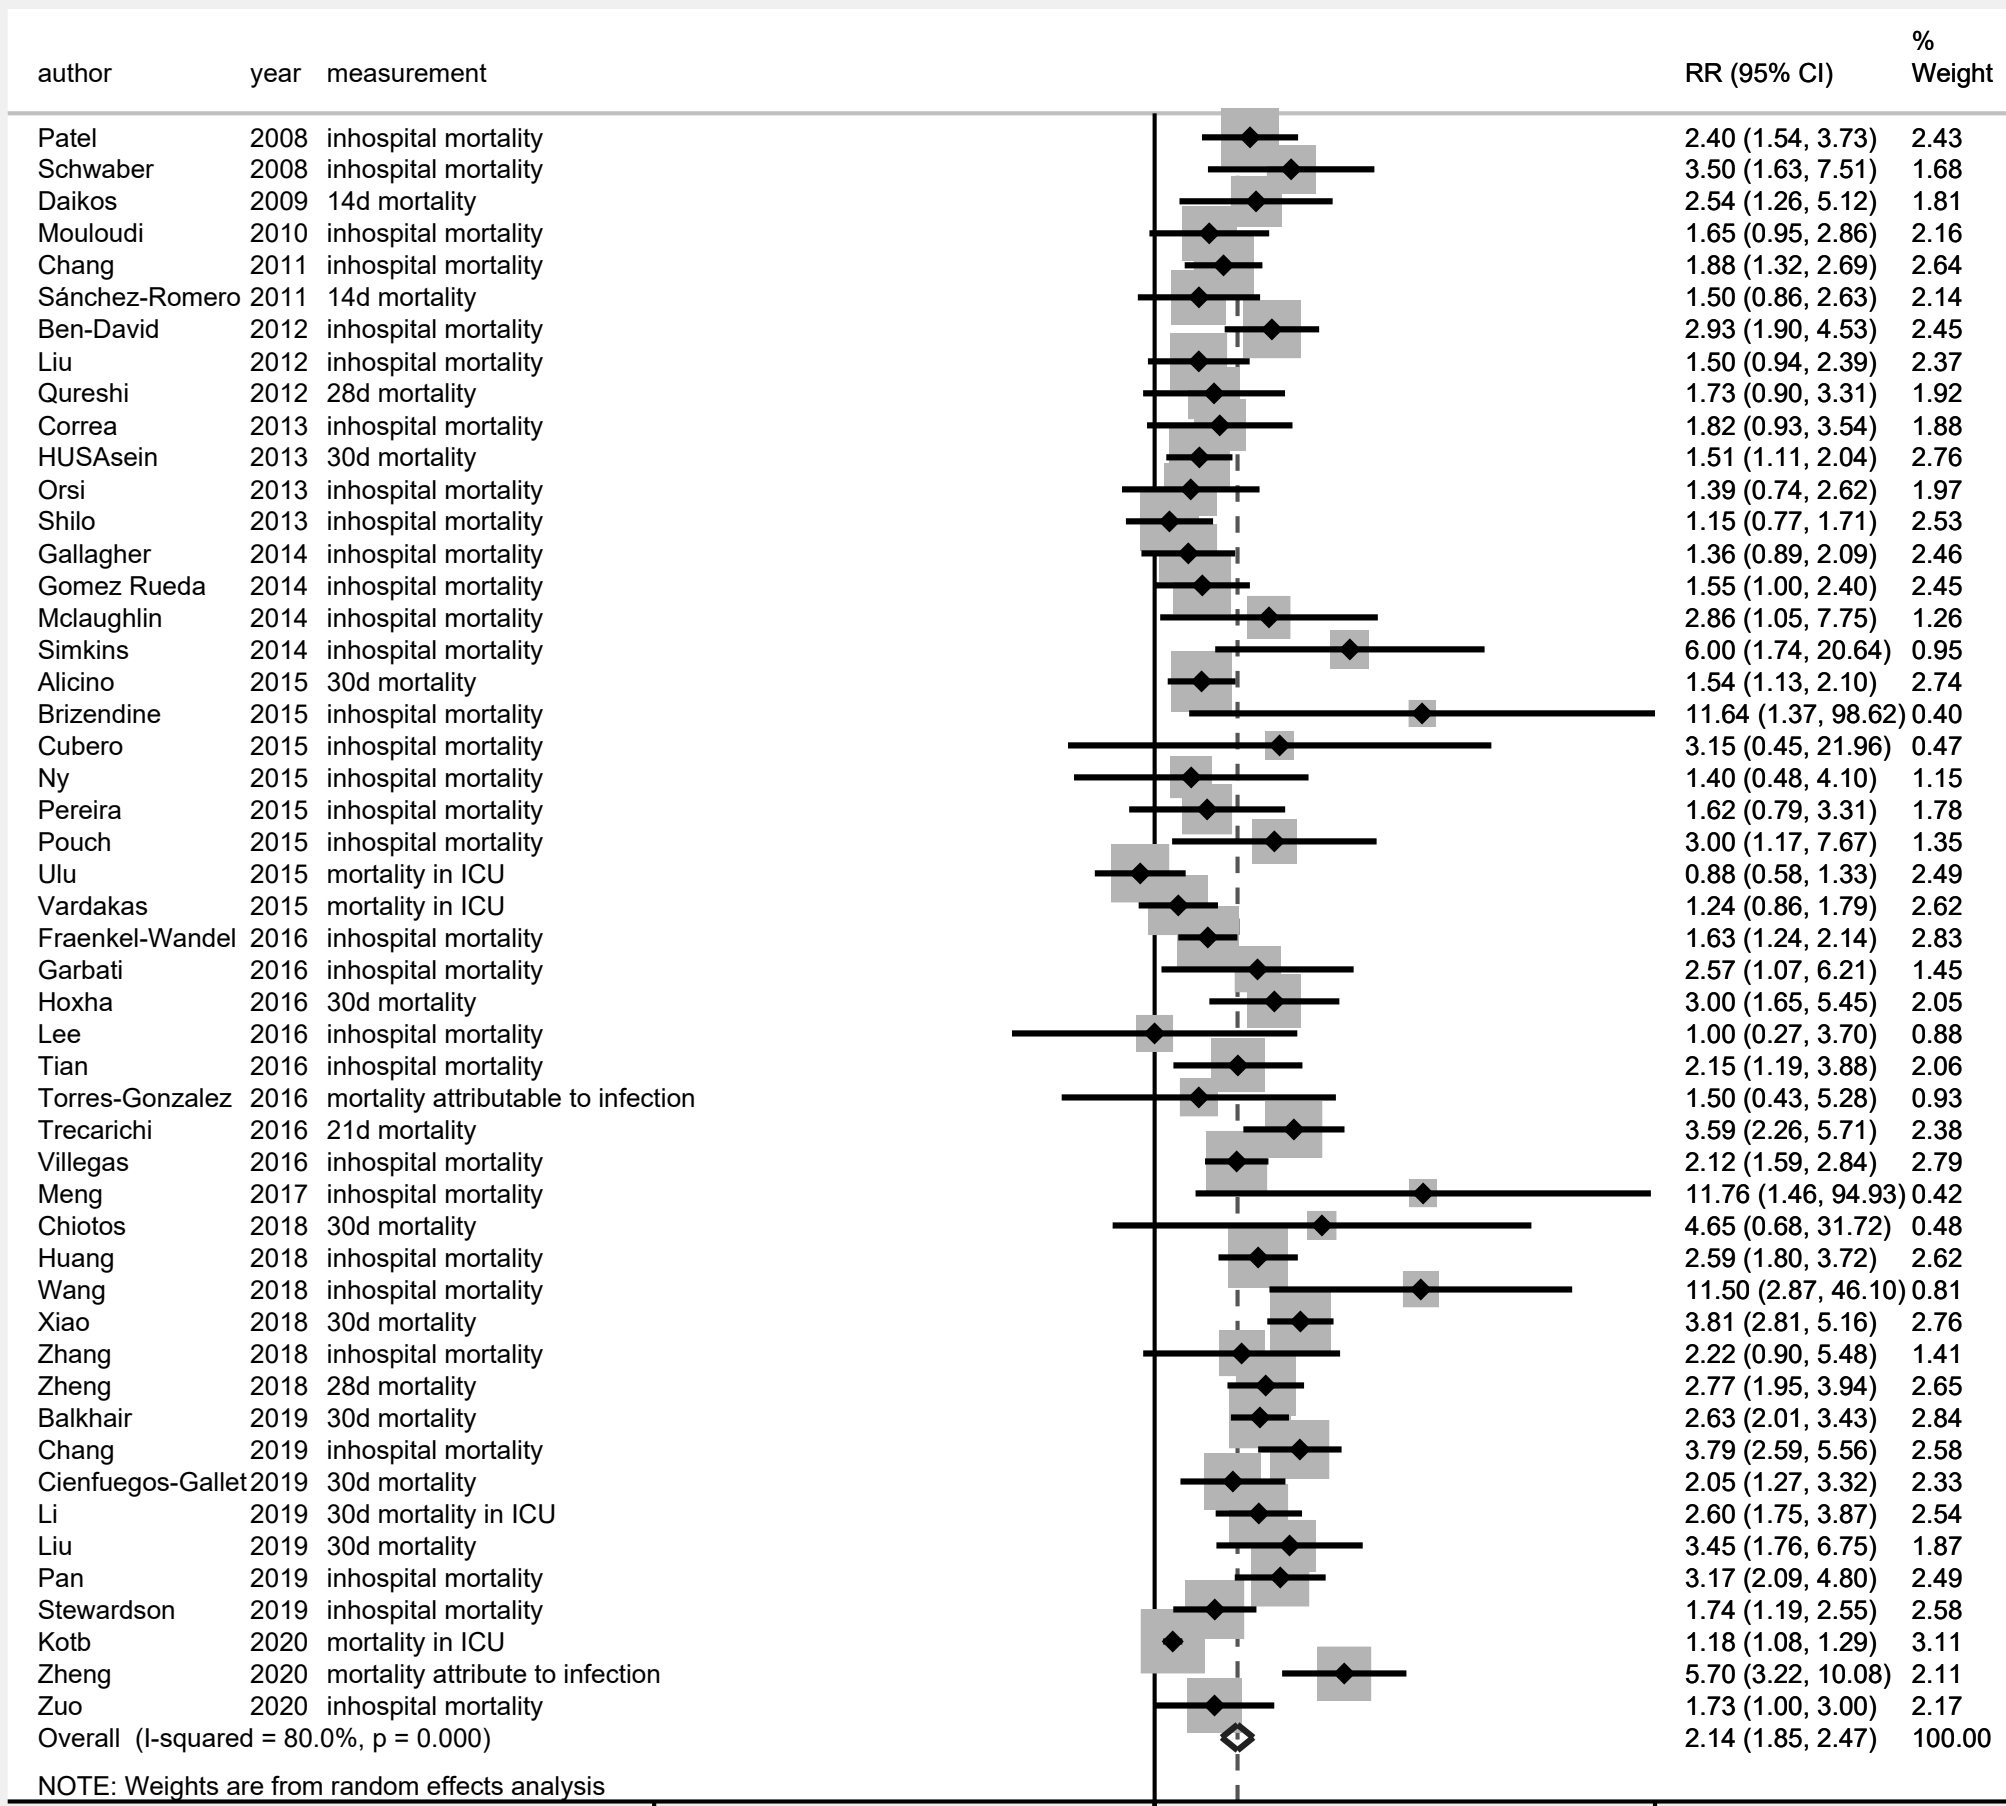

NOTE: Weights are from random effects analysis

.0101 1 98.6

1  
2  
3  
4  
5  
6  
7  
8  
9  
10  
11  
12  
13  
14  
15  
16  
17  
18  
19  
20  
21  
22  
23  
24  
25  
26  
27  
28  
29  
30  
31  
32  
33  
34  
35  
36  
37  
38  
39  
40  
41  
42  
43  
44  
45  
46  
47  
48  
49  
50  
51  
52  
53  
54  
55  
56  
57  
58  
59  
60

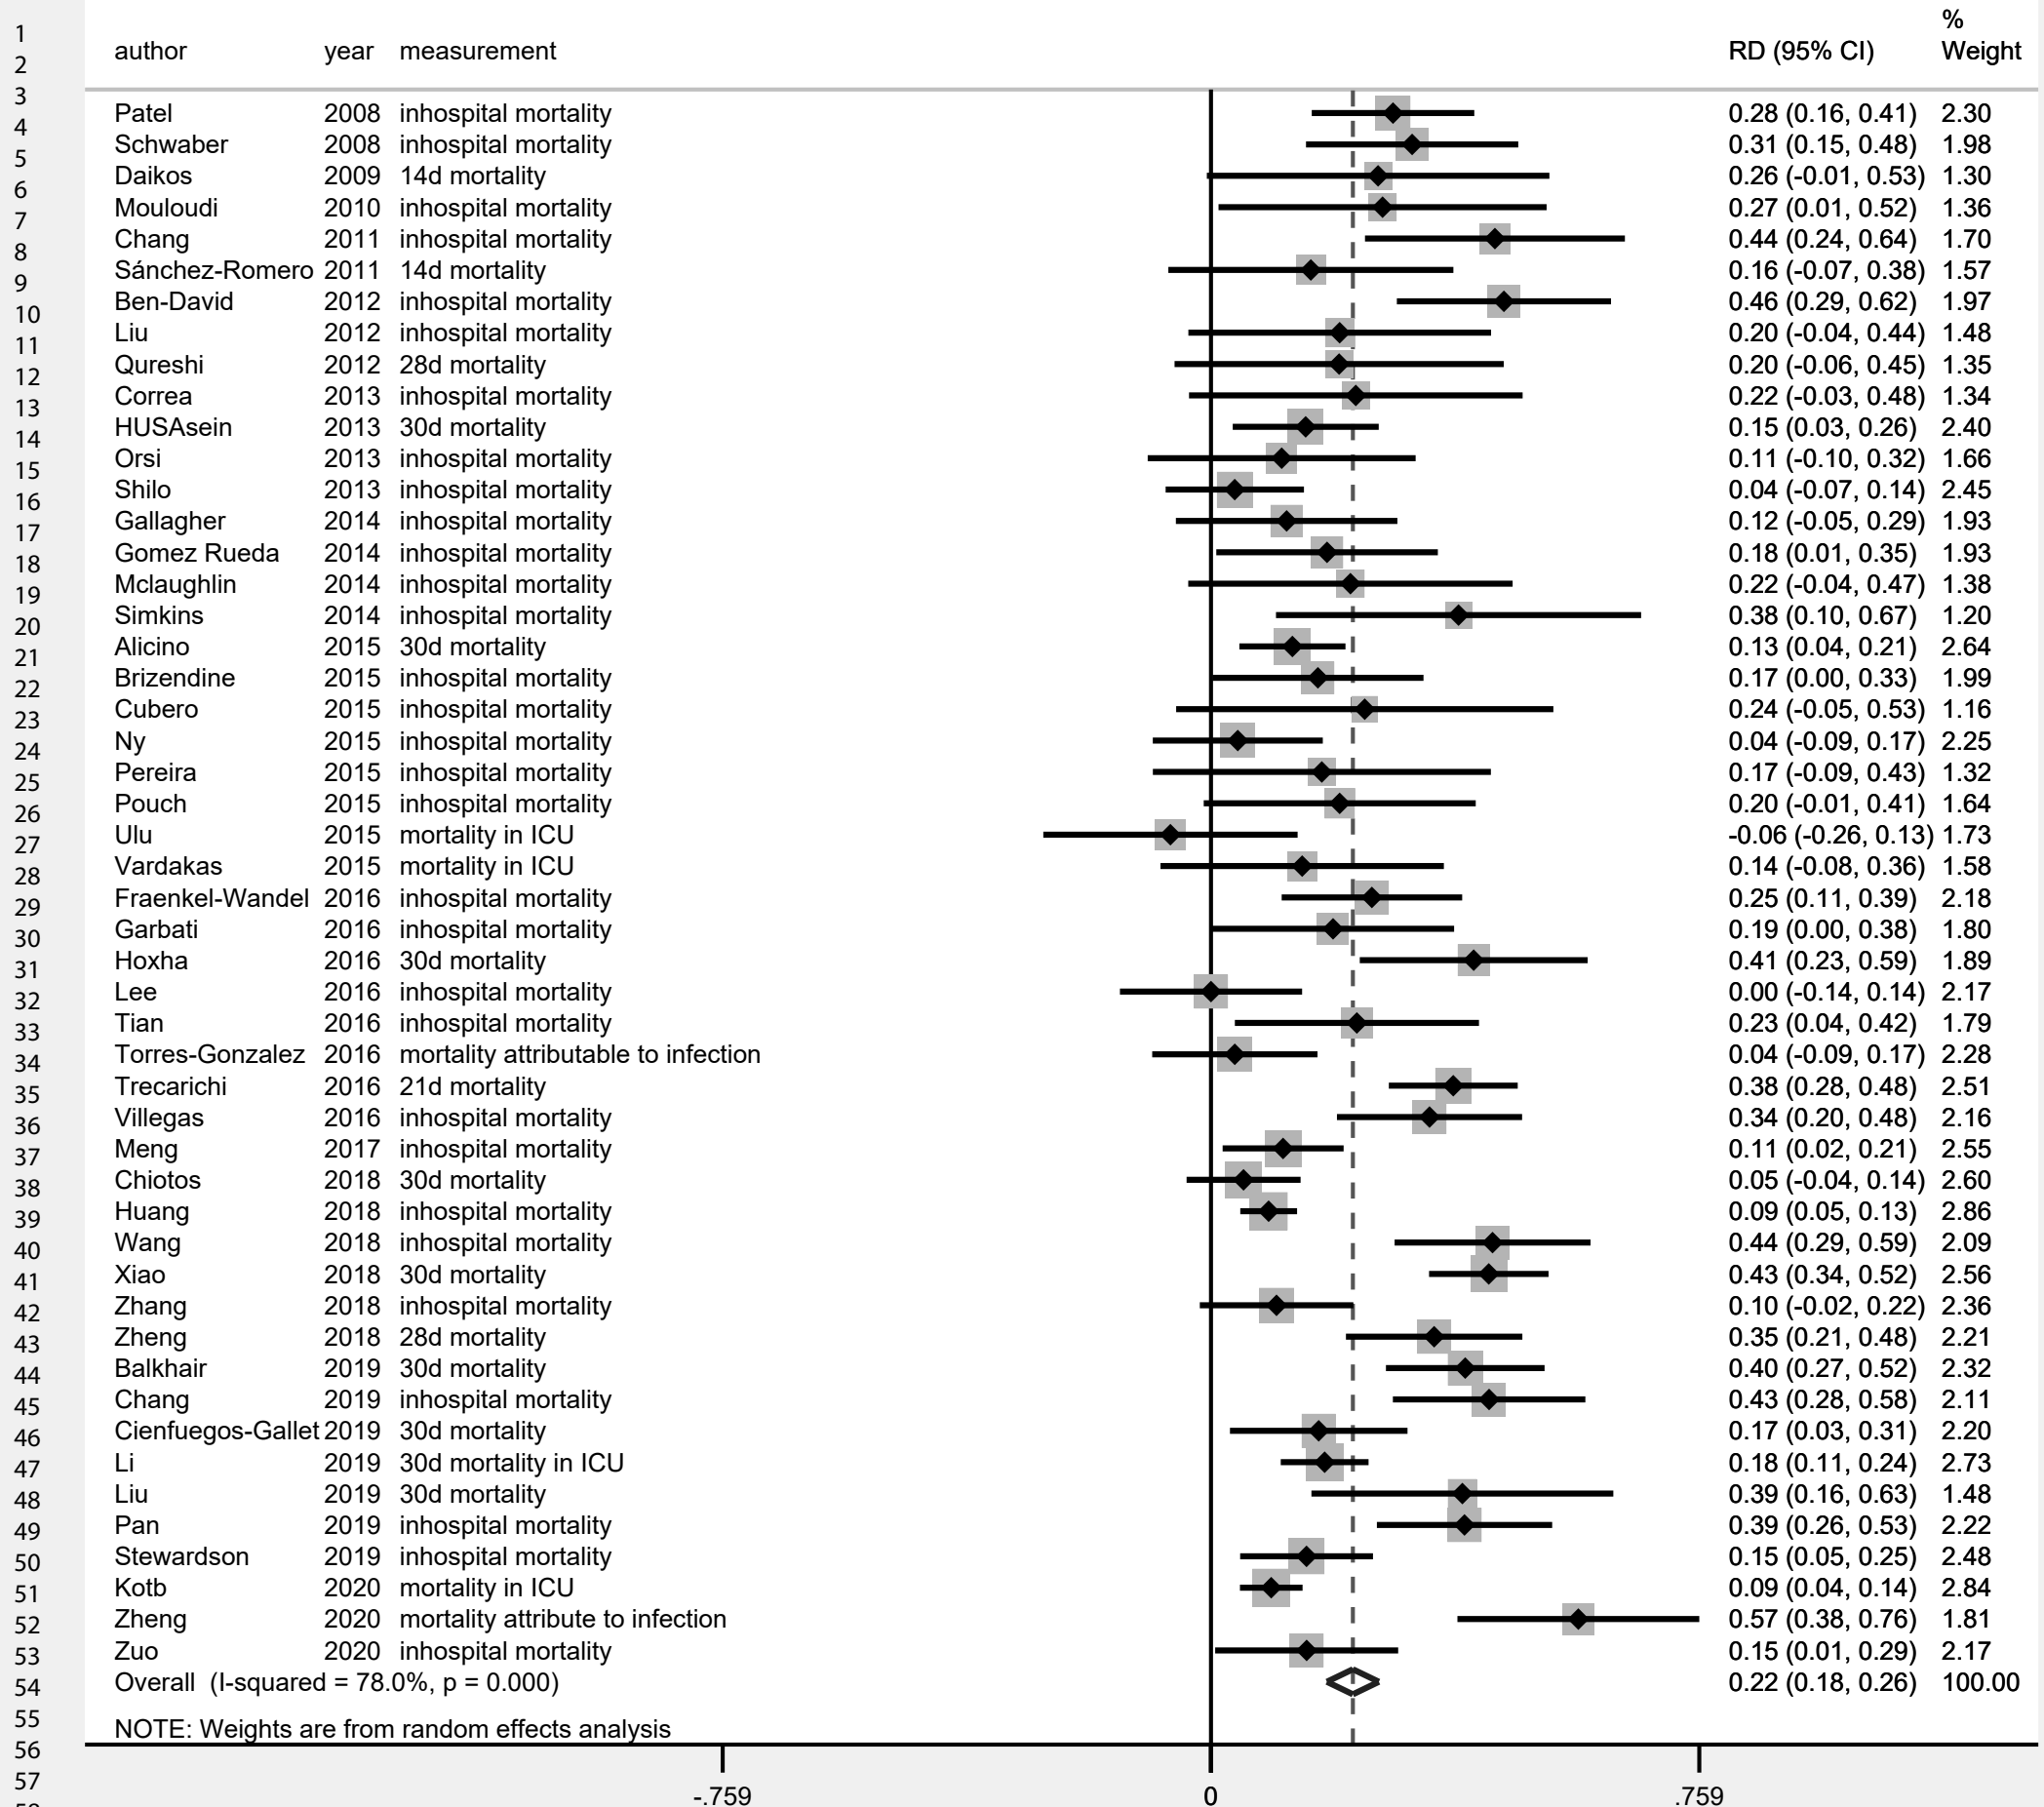

-0.759

0

0.759

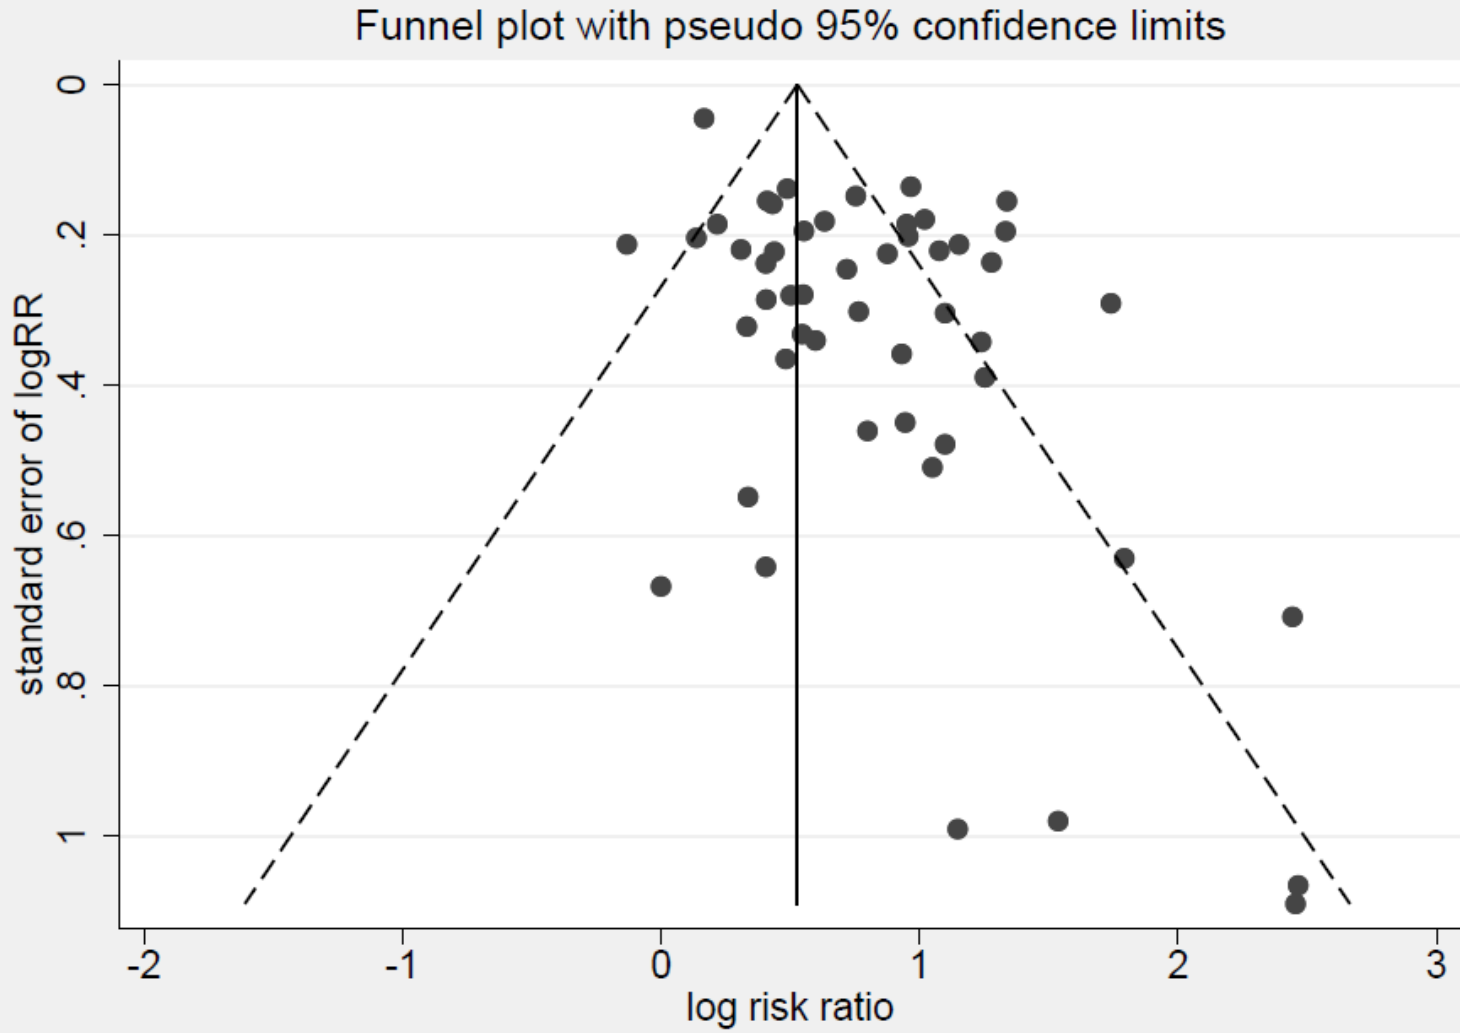

1  
2  
3  
4  
5  
6  
7  
8  
9  
10  
11  
12  
13  
14  
15  
16  
17  
18  
19  
20  
21  
22  
23  
24  
25  
26  
27  
28  
29  
30  
31  
32  
33  
34  
35  
36  
37  
38  
39  
40  
41  
42  
43  
44  
45  
46

## Supplementary Materials

### Appendix 1. Search terms and search strategies

#### 1.Pubmed (4448)

| Search | Query                                                                                                                                                                                                                                                                                  | Items found |
|--------|----------------------------------------------------------------------------------------------------------------------------------------------------------------------------------------------------------------------------------------------------------------------------------------|-------------|
| #1     | Search: ((enterobacteriaceae[MeSH Terms]) OR klebsiella pneumoniae[MeSH Terms]) OR escherichia coli[MeSH Terms]                                                                                                                                                                        | 399348      |
| #2     | Search: (((carbapenem resistant) OR (carbapenem resistance)) OR (carbapenem nonsusceptible)) OR (carbapenemase producing)                                                                                                                                                              | 15576       |
| #3     | Search: (((enterobacteriaceae[MeSH Terms]) OR (klebsiella pneumoniae[MeSH Terms])) OR (escherichia coli[MeSH Terms])) AND (((carbapenem resistant) OR (carbapenem resistance)) OR (carbapenem nonsusceptible)) OR (carbapenemase producing)                                            | 5776        |
| #4     | Search: (((enterobacteriaceae[MeSH Terms]) OR (klebsiella pneumoniae[MeSH Terms])) OR (escherichia coli[MeSH Terms])) AND (((carbapenem resistant) OR (carbapenem resistance)) OR (carbapenem nonsusceptible)) OR (carbapenemase producing) Filters: Humans                            | 4761        |
| #5     | Search: (((enterobacteriaceae[MeSH Terms]) OR (klebsiella pneumoniae[MeSH Terms])) OR (escherichia coli[MeSH Terms])) AND (((carbapenem resistant) OR (carbapenem resistance)) OR (carbapenem nonsusceptible)) OR (carbapenemase producing) Filters: Humans, from 1994 - 2020          | 4716        |
| #6     | Search: (((enterobacteriaceae[MeSH Terms]) OR (klebsiella pneumoniae[MeSH Terms])) OR (escherichia coli[MeSH Terms])) AND (((carbapenem resistant) OR (carbapenem resistance)) OR (carbapenem nonsusceptible)) OR (carbapenemase producing) Filters: Humans, English, from 1994 - 2020 | 4448        |

#### 2.Embase(5348)

| #  | searches                                                        | results |
|----|-----------------------------------------------------------------|---------|
| 1  | Enterobacteriaceae.af.                                          | 38034   |
| 2  | Klebsiella pneumoniae.af.                                       | 47767   |
| 3  | Escherichia coli.af.                                            | 425764  |
| 4  | 1 or 2 or 3                                                     | 470290  |
| 5  | carbapenem resistant.af.                                        | 7442    |
| 6  | carbapenem resistance.af.                                       | 3418    |
| 7  | carbapenem nonsusceptible.af.                                   | 139     |
| 8  | carbapenemase producing.af.                                     | 3413    |
| 9  | 5 or 6 or 7 or 8                                                | 11419   |
| 10 | 4 and 9                                                         | 8235    |
| 11 | limit 10 to (human and english language and yr="1994 -Current") | 5348    |

## 3. Web of Science(3036)

| # | searches                                                                                                                                                                                                                                               | results |
|---|--------------------------------------------------------------------------------------------------------------------------------------------------------------------------------------------------------------------------------------------------------|---------|
| 1 | TI=(Enterobacteriaceae)<br>Databases= WOS, BCI, BIOSIS, CABI, CSCD, DIIDW, INSPEC, KJD, MEDLINE, RSCI, SCIELO, ZOOREC Timespan=1994-2020<br>Search language=English                                                                                    | 6685    |
| 2 | TI=(Klebsiella pneumoniae)<br>Databases= WOS, BCI, BIOSIS, CABI, CSCD, DIIDW, INSPEC, KJD, MEDLINE, RSCI, SCIELO, ZOOREC Timespan=1994-2020<br>Search language=English                                                                                 | 10759   |
| 3 | TI=(Escherichia coli)<br>Databases= WOS, BCI, BIOSIS, CABI, CSCD, DIIDW, INSPEC, KJD, MEDLINE, RSCI, SCIELO, ZOOREC Timespan=1994-2020<br>Search language=English                                                                                      | 102497  |
| 4 | #3 OR #2 OR #1<br>Databases= WOS, BCI, BIOSIS, CABI, CSCD, DIIDW, INSPEC, KJD, MEDLINE, RSCI, SCIELO, ZOOREC Timespan=1994-2020<br>Search language=English                                                                                             | 118551  |
| 5 | TI=(carbapenem resistance OR carbapenem resistant OR carbapenem nonsusceptible OR carbapenemase producing)<br>Databases= WOS, BCI, BIOSIS, CABI, CSCD, DIIDW, INSPEC, KJD, MEDLINE, RSCI, SCIELO, ZOOREC Timespan=1994-2020<br>Search language=English | 5926    |
| 6 | #5 AND #4<br>Databases= WOS, BCI, BIOSIS, CABI, CSCD, DIIDW, INSPEC, KJD, MEDLINE, RSCI, SCIELO, ZOOREC Timespan=1994-2020<br>Search language=English                                                                                                  | 3036    |

## 4. Cochrane library

| ID | Search                                                                                | Hits |
|----|---------------------------------------------------------------------------------------|------|
| #1 | (carbapenem) AND (Enterobacteriaceae) (Limits: Word variations have been searched)    | 137  |
| #2 | (carbapenem) AND (Klebsiella pneumoniae) (Limits: Word variations have been searched) | 71   |
| #3 | (carbapenem) AND (Escherichia coli) (Limits: Word variations have been searched)      | 67   |
| #4 | #1 OR #2 OR #3 with Cochrane Library publication date Between Jan 1994 and Sep 2020   | 174  |

## Appendix 2. List of excluded studies with reason for exclusion

| First author                   | Year | Reason for exclusion                             |
|--------------------------------|------|--------------------------------------------------|
| Adams <sup>1</sup>             | 2019 | inappropriate control group                      |
| Ahn <sup>2</sup>               | 2014 | Not specific to patients with CRE infection      |
| Akgul <sup>3</sup>             | 2016 | Not specific to patients with CRE infection      |
| Balkan <sup>4</sup>            | 2014 | inappropriate control group                      |
| Biehle <sup>5</sup>            | 2015 | not a pathogen of interest                       |
| Bleumin <sup>6</sup>           | 2012 | No separate data for patients with CRE infection |
| Bogan <sup>7</sup>             | 2014 | No separate data for patients with CRE infection |
| Chang <sup>8</sup>             | 2015 | no control group                                 |
| Cristina <sup>9</sup>          | 2016 | no control group                                 |
| Dautzenberg <sup>10</sup>      | 2015 | Not specific to patients with CRE infection      |
| de Maio Carrilho <sup>11</sup> | 2016 | no control group                                 |
| Debby <sup>12</sup>            | 2012 | Not specific to patients with CRE infection      |
| Diaz <sup>13</sup>             | 2016 | Not specific to patients with CRE infection      |
| Dizbay <sup>14</sup>           | 2014 | not a pathogen of interest                       |
| Eser <sup>15</sup>             | 2019 | Not specific to patients with CRE infection      |
| Falcone <sup>16</sup>          | 2009 | not a pathogen of interest                       |
| Fang <sup>17</sup>             | 2019 | No separate data for patients with CRE infection |
| Forde <sup>18</sup>            | 2017 | No separate data for patients with CRE infection |
| Freire <sup>19</sup>           | 2015 | inappropriate control group                      |
| Gao <sup>20</sup>              | 2019 | inappropriate control group                      |
| Gasink <sup>21</sup>           | 2009 | No separate data for patients with CRE infection |
| Gaviria <sup>22</sup>          | 2011 | Letters, comments or reports                     |
| Giacobbe <sup>23</sup>         | 2015 | Not the antibiotic resistance of interest        |
| Giannella <sup>24</sup>        | 2014 | Not specific to patients with CRE infection      |
| Girmania <sup>25</sup>         | 2015 | inappropriate control group                      |
| Girometti <sup>26</sup>        | 2014 | no outcomes of interest                          |
| Gowda <sup>27</sup>            | 2014 | no outcomes of interest                          |
| Grabowsk <sup>28</sup>         | 2017 | No separate data for patients with CRE infection |
| Hauck <sup>29</sup>            | 2016 | inappropriate control group                      |
| Hu <sup>30</sup>               | 2016 | Not specific to patients with CRE infection      |
| Jiao <sup>31</sup>             | 2015 | No separate data for patients with CRE infection |
| Kang <sup>32</sup>             | 2019 | Not specific to patients with CRE infection      |
| Kofteridis <sup>33</sup>       | 2014 | No separate data for patients with CRE infection |
| Lai <sup>34</sup>              | 2013 | inappropriate control group                      |
| Lee <sup>35</sup>              | 2013 | no outcomes of interest                          |
| Lee <sup>36</sup>              | 2012 | inappropriate control group                      |
| López-González <sup>37</sup>   | 2017 | inappropriate control group                      |
| Lubbert <sup>38</sup>          | 2014 | No separate data for patients with CRE infection |
| Mantzarlis <sup>39</sup>       | 2013 | inappropriate control group                      |

|    |                                       |      |                                                  |
|----|---------------------------------------|------|--------------------------------------------------|
| 1  |                                       |      |                                                  |
| 2  |                                       |      |                                                  |
| 3  | Marimuthu <sup>40</sup>               | 2013 | Letters, comments or reports                     |
| 4  | Mazza <sup>41</sup>                   | 2017 | inappropriate control group                      |
| 5  | Miller <sup>42</sup>                  | 2016 | no outcomes of interest                          |
| 6  | Mouloudi <sup>43</sup>                | 2014 | inappropriate control group                      |
| 7  | Muggeo <sup>44</sup>                  | 2017 | No separate data for patients with CRE infection |
| 8  | Nouvenne <sup>45</sup>                | 2014 | No separate data for patients with CRE infection |
| 9  | Orsi <sup>46</sup>                    | 2011 | inappropriate control group                      |
| 10 | Papadimitriou-Olivgeris <sup>47</sup> | 2013 | Not specific to patients with CRE infection      |
| 11 | Patel <sup>48</sup>                   | 2015 | inappropriate control group                      |
| 12 | Porwal <sup>49</sup>                  | 2014 | Letters, comments or reports                     |
| 13 | Qureshi <sup>50</sup>                 | 2014 | inappropriate control group                      |
| 14 | Rodrigues <sup>51</sup>               | 2016 | inappropriate control group                      |
| 15 | Salsano <sup>52</sup>                 | 2016 | inappropriate control group                      |
| 16 | Segagni Lusignani <sup>53</sup>       | 2020 | No separate data for patients with CRE infection |
| 17 | Shankar <sup>54</sup>                 | 2018 | no control group                                 |
| 18 | Taminato <sup>55</sup>                | 2019 | inappropriate control group                      |
| 19 | Tamma <sup>56</sup>                   | 2017 | inappropriate control group                      |
| 20 | Tascini <sup>57</sup>                 | 2015 | Not specific to patients with CRE infection      |
| 21 | Tsereteli <sup>58</sup>               | 2018 | no outcomes of interest                          |
| 22 | Tumbarello <sup>59</sup>              | 2015 | inappropriate control group                      |
| 23 | Tumbarello <sup>60</sup>              | 2014 | inappropriate control group                      |
| 24 | Tuon <sup>61</sup>                    | 2017 | no outcomes of interest                          |
| 25 | Jamal <sup>62</sup>                   | 2016 | no outcomes of interest                          |
| 26 | Wang <sup>63</sup>                    | 2016 | No separate data for patients with CRE infection |
| 27 |                                       |      |                                                  |
| 28 |                                       |      |                                                  |
| 29 |                                       |      |                                                  |
| 30 |                                       |      |                                                  |
| 31 |                                       |      |                                                  |
| 32 |                                       |      |                                                  |
| 33 |                                       |      |                                                  |
| 34 |                                       |      |                                                  |
| 35 |                                       |      |                                                  |
| 36 |                                       |      |                                                  |
| 37 |                                       |      |                                                  |
| 38 |                                       |      |                                                  |
| 39 |                                       |      |                                                  |
| 40 |                                       |      |                                                  |
| 41 |                                       |      |                                                  |
| 42 |                                       |      |                                                  |
| 43 |                                       |      |                                                  |
| 44 |                                       |      |                                                  |
| 45 |                                       |      |                                                  |
| 46 |                                       |      |                                                  |
| 47 |                                       |      |                                                  |
| 48 |                                       |      |                                                  |
| 49 |                                       |      |                                                  |
| 50 |                                       |      |                                                  |
| 51 |                                       |      |                                                  |
| 52 |                                       |      |                                                  |
| 53 |                                       |      |                                                  |
| 54 |                                       |      |                                                  |
| 55 |                                       |      |                                                  |
| 56 |                                       |      |                                                  |
| 57 |                                       |      |                                                  |
| 58 |                                       |      |                                                  |
| 59 |                                       |      |                                                  |
| 60 |                                       |      |                                                  |

## References of studies excluded

1. Adams DJ, Susi A, Nylund CM. Clinical characteristics, risk factors, and outcomes of patients hospitalized in the US military health system with carbapenem-resistant Enterobacteriaceae infection. *Am J Infect Control* 2020;48:644-649. doi: 10.1016/j.ajic.2019.10.006. [Epub ahead of print: 20 Nov 2019].
2. Ahn JY, Song JE, Kim MH, *et al.* Risk factors for the acquisition of carbapenem-resistant Escherichia coli at a tertiary care center in South Korea: A matched case-control study. *Am J Infect Control* 2014;42:621-5.
3. Akgul F, Bozkurt I, Sunbul M, Esen S, Leblebicioglu H. Risk factors and mortality in the Carbapenem-resistant Klebsiella pneumoniae infection: case control study. *Pathog Glob Health* 2016;110:321-325. doi: 10.1080/20477724.2016.1254976. [Epub ahead of print: 01 Dec 2016].
4. Balkan II, Aygun G, Aydin S, Mutcali SI, Kara Z, Kuskucu M, *et al.* Blood stream infections due to OXA-48-like carbapenemase-producing Enterobacteriaceae: Treatment and survival. *Int J Infect Dis* 2014;26:51-6. doi: 10.1016/j.ijid.2014.05.012. [Epub ahead of print: 03 Jul 2014].
5. Biehle LR, Cottreau JM, Thompson DJ, Filipek RL, O'Donnell JN, Lasco TM, *et al.* Outcomes and risk factors for mortality among patients treated with carbapenems for klebsiella spp. Bacteremia. *PLoS One* 2015;10:e0143845.
6. Bleumin D, Cohen MJ, Moranne O, Esnault VLM, Benenson S, Paltiel O, *et al.* Carbapenem-resistant Klebsiella pneumoniae is associated with poor outcome in hemodialysis patients. *J Infect* 2012;65:318-25. doi: 10.1016/j.jinf.2012.06.005. [Epub ahead of print: 18 Jun 2012].
7. Bogan C, Kaye KS, Chopra T, Hayakawa K, Pogue JM, Lephart PR, *et al.* Outcomes of carbapenem-resistant Enterobacteriaceae isolation: Matched analysis. *Am J Infect Control* 2014;42:612-20.
8. Chang YY, Chuang YC, Siu LK, Wu TL, Lin JC, Lu PL, *et al.* Clinical features of patients with carbapenem nonsusceptible Klebsiella pneumoniae and Escherichia coli in intensive care units: a nationwide multicenter study in Taiwan. *J Microbiol Immunol Infect* 2015;48:219-25. doi: 10.1016/j.jmii.2014.05.010. [Epub ahead of print: 26 Jul 2014].
9. Cristina ML, Sartini M, Ottria G, Schinca E, Cenderello N, Crisalli MP, *et al.* Epidemiology and biomolecular characterization of carbapenem-resistant klebsiella pneumoniae in an Italian hospital. *J Prev Med Hyg* 2016;57:E149-E156.
10. Dautzenberg MJ, Wekesa AN, Gniadkowski M, Antoniadou A, Giamarellou H, Petrikos GL, *et al.* The Association between Colonization with Carbapenemase-Producing Enterobacteriaceae and Overall ICU Mortality: An Observational Cohort Study. *Crit Care Med* 2015;43:1170-7.
11. de Maio Carrilho CM, de Oliveira LM, Gaudereto J, Perozin JS, Urbano MR, Camargo CH, *et al.* A prospective study of treatment of carbapenem-resistant Enterobacteriaceae infections and risk factors associated with outcome. *BMC Infect Dis* 2016;16:629.
12. Debby BD, Ganor O, Yasmin M, David L, Nathan K, Ilana T, *et al.* Epidemiology of carbapenem resistant Klebsiella pneumoniae colonization in an intensive care unit. *Eur J*



- 1  
2  
3  
4  
5  
6  
7  
8  
9  
10  
11  
12  
13  
14  
15  
16  
17  
18  
19  
20  
21  
22  
23  
24  
25  
26  
27  
28  
29  
30  
31  
32  
33  
34  
35  
36  
37  
38  
39  
40  
41  
42  
43  
44  
45  
46  
47  
48  
49  
50  
51  
52  
53  
54  
55  
56  
57  
58  
59  
60
- Clin Microbiol Infect Dis* 2012;31:1811-7. doi: 10.1007/s10096-011-1506-5. [Epub ahead of print: 14 Jan 2012].
13. Diaz A, Ortiz DC, Trujillo M, Garces C, Jaimes F, Restrepo AV. Clinical Characteristics of Carbapenem-resistant *Klebsiella pneumoniae* Infections in Ill and Colonized Children in Colombia. *Pediatr Infect Dis J* 2016;35:237-41.
14. Dizbay M, Tunccan OG, Karasahin O, Aktas F. Emergence of carbapenem-resistant *Klebsiella* spp. infections in a Turkish university hospital: epidemiology and risk factors. *J Infect Dev Ctries* 2014;8:44-9.
15. Eser F, Yilmaz GR, Guner R, Hasanoglu I, Urkmez Korkmaz FY, Acikgoz ZC, et al. Risk factors for rectal colonization of carbapenem-resistant Enterobacteriaceae in a tertiary care hospital: a case-control study from Turkey. *Turk J Med Sci* 2019;49:341-346.
16. Falcone M, Mezzatesta ML, Perilli M, Forcella C, Venditti M. Infections with VIM-1 metallo- $\beta$ -lactamase-producing enterobacter cloacae and their correlation with clinical outcome. *J Clin Microbiol* 2009;47:3514-9. doi: 10.1128/JCM.01193-09. [Epub ahead of print: 09 Sep 2009].
17. Fang L, Lu X, Xu H, Ma X, Chen Y, Liu Y, et al. Epidemiology and risk factors for carbapenem-resistant Enterobacteriaceae colonisation and infections: case-controlled study from an academic medical center in a southern area of China. *Pathog Dis* 2019;77:ftz034.
18. Forde C, Stierman B, Ramon-Pardo P, Dos Santos T, Singh N. Carbapenem-resistant *Klebsiella pneumoniae* in Barbados: Driving change in practice at the national level. *PLoS One* 2017;12:e0176779.
19. Freire MP, Pierrotti LC, Filho HHC, Ibrahim KY, Magri ASGK, Bonazzi PR, et al. Infection with *Klebsiella pneumoniae* carbapenemase (KPC)-producing *Klebsiella pneumoniae* in cancer patients. *Eur J Clin Microbiol Infect Dis* 2015;34:277-86. doi: 10.1007/s10096-014-2233-5. [Epub ahead of print: 30 Aug 2014].
20. Gao B, Li X, Yang F, Chen W, Zhao Y, Bai G, et al. Molecular Epidemiology and Risk Factors of Ventilator-Associated Pneumonia Infection Caused by Carbapenem-Resistant Enterobacteriaceae. *Front Pharmacol* 2019;10:262.
21. Gasink LB, Edelstein PH, Lautenbach E, Synnestvedt M, Fishman NO. Risk Factors and Clinical Impact of *Klebsiella pneumoniae* Carbapenemase-Producing *K. pneumoniae*. *Infect Control Hosp Epidemiol* 2009;30:1180-5.
22. Centers for Disease Control and Prevention (CDC). Carbapenem-resistant *Klebsiella pneumoniae* associated with a long-term--care facility --- West Virginia, 2009-2011. *MMWR Morb Mortal Wkly Rep* 2011;60:1418-20.
23. Giacobbe DR, Del Bono V, Treccarichi EM, De Rosa FG, Giannella M, Bassetti M, et al. Risk factors for bloodstream infections due to colistin-resistant KPC-producing *Klebsiella pneumoniae*: results from a multicenter case-control study. *Clin Microbiol Infect* 2015;21:1106.e1-8. doi: 10.1016/j.cmi.2015.08.001. [Epub ahead of print: 14 Aug 2015].
24. Giannella M, Morelli MC, Cristini F, Ercolani G, Cescon M, Bartoletti M, et al. Carbapenem-resistant *Klebsiella pneumoniae* colonization at liver transplantation: A management challenge. *Liver Transpl* 2014;20:631-3.
25. Girmenia C, Rossolini GM, Picocchi A, Bertaina A, Pisapia G, Pastore D, et al. Infections by carbapenem-resistant *Klebsiella pneumoniae* in SCT recipients: a

- 1  
2  
3 nationwide retrospective survey from Italy. *Bone Marrow Transplant* 2015;50:282-8. doi:  
4 10.1038/bmt.2014.231. [Epub ahead of print: 13 Oct 2014].
- 5  
6 26. Girometti N, Lewis RE, Giannella M, Ambretti S, Viale P. Klebsiella pneumoniae  
7 Bloodstream Infection: Epidemiology and Impact of Inappropriate Empirical Therapy.  
8 *Medicine (Baltimore)* 2014;93:298-309.
- 9  
10 27. Gowda LK, Marie MAM. Epidemiology of carbapenem-resistant and  
11 noncarbapenem-resistant enterobacteriaceae and issues related to susceptibility testing,  
12 treatment options, and clinical outcome. *Rev Medi Microbiol* 2014;25:53-65.
- 13  
14 28. Grabowski ME, Kang H, Wells KM, Sifri CD, Mathers AJ, Lobo JM. Provider Role in  
15 Transmission of Carbapenem-Resistant Enterobacteriaceae. *Infect Control Hosp*  
16 *Epidemiol* 2017;38:1329-1334. doi: 10.1017/ice.2017.216. [Epub ahead of print: 24 Oct  
17 2017].
- 18  
19 29. Hauck C, Cober E, Richter SS, Perez F, Salata RA, Kalayjian RC, et al. Spectrum of  
20 excess mortality due to carbapenem-resistant Klebsiella pneumoniae infections. *Clin*  
21 *Microbiol Infect* 2016;22:513-9. doi: 10.1016/j.cmi.2016.01.023. [Epub ahead of print: 03  
22 Feb 2016].
- 23  
24 30. Hu Y, Ping Y, Li L, Xu H, Yan X, Dai H. A retrospective study of risk factors for  
25 carbapenem-resistant Klebsiella pneumoniae acquisition among ICU patients. *J Infect*  
26 *Dev Ctries* 2016;10:208-13.
- 27  
28 31. Jiao Y, Qin Y, Liu J, Li Q, Dong Y, Shang Y, et al. Risk factors for carbapenem-resistant  
29 Klebsiella pneumoniae infection/colonization and predictors of mortality: a retrospective  
30 study. *Pathog Glob Health* 2015;109:68-74. doi: 10.1179/2047773215Y.0000000004.  
31 [Epub ahead of print: 24 Feb 2015].
- 32  
33 32. Kang JS, Yi J, Ko MK, Lee SO, Lee JE, Kim K-H. Prevalence and Risk Factors of  
34 Carbapenem-resistant Enterobacteriaceae Acquisition in an Emergency Intensive Care  
35 Unit in a Tertiary Hospital in Korea: a Case-Control Study. *J Korean Med Sci*  
36 2019;34:e140.
- 37  
38 33. Kofteridis DP, Valachis A, Dimopoulou D, Maraki S, Christidou A, Mantadakis E, et al.  
39 Risk factors for carbapenem-resistant Klebsiella pneumoniae infection/colonization: a  
40 case-case-control study. *J Infect Chemother* 2014;20:293-7. doi:  
41 10.1016/j.jiac.2013.11.007. [Epub ahead of print: 03 Apr 2014]
- 42  
43 34. Lai CC, Wu UI, Wang JT, Chang SC. Prevalence of carbapenemase-producing  
44 Enterobacteriaceae and its impact on clinical outcomes at a teaching hospital in Taiwan. *J*  
45 *Formos Med Assoc* 2013;112:492-6. doi: 10.1016/j.jfma.2012.09.021. [Epub ahead of  
46 print: 22 Nov 2012].
- 47  
48 35. Lee GC, Lawson KA, Burgess DS. Clinical epidemiology of carbapenem-resistant  
49 enterobacteriaceae in community hospitals: A case-case-control study. *Ann Pharmacother*  
50 2013;47:1115-21.
- 51  
52 36. Lee NY, Wu JJ, Lin SH, Ko WC, Tsai LH, Yan JJ. Characterization of  
53 carbapenem-nonsusceptible Klebsiella pneumoniae bloodstream isolates at a Taiwanese  
54 hospital: clinical impacts of lowered breakpoints for carbapenems. *Eur J Clin Microbiol*  
55 *Infect Dis* 2012;31:1941-50. doi: 10.1007/s10096-011-1525-2. [Epub ahead of print: 18  
56 Jan 2012].  
57  
58  
59  
60

- 1  
2  
3  
4  
5  
6  
7  
8  
9  
10  
11  
12  
13  
14  
15  
16  
17  
18  
19  
20  
21  
22  
23  
24  
25  
26  
27  
28  
29  
30  
31  
32  
33  
34  
35  
36  
37  
38  
39  
40  
41  
42  
43  
44  
45  
46  
47  
48  
49  
50  
51  
52  
53  
54  
55  
56  
57  
58  
59  
60
37. Lopez-Gonzalez L, Candel FJ, Vinuela-Prieto JM, Gonzalez-Del Castillo J, Garcia AB, Pena I, et al. Useful independent factors for distinguish infection and colonization in patients with urinary carbapenemase-producing Enterobacteriaceae isolation. *Rev Esp Quimioter* 2017;30:450-457. [Epub ahead of print: 07 Nov 2017].
  38. Lubbert C, Becker-Rux D, Rodloff AC, Laudi S, Busch T, Bartels M, et al. Colonization of liver transplant recipients with KPC-producing *Klebsiella pneumoniae* is associated with high infection rates and excess mortality: a case-control analysis. *Infection* 2014;42:309-16. doi: 10.1007/s15010-013-0547-3. [Epub ahead of print: 12 Nov 2013].
  39. Mantzaris K, Makris D, Manoulakas E, Karvouniaris M, Zakyntinos E. Risk factors for the first episode of *Klebsiella pneumoniae* resistant to carbapenems infection in critically ill patients: a prospective study. *Biomed Res Int* 2013;2013:850547. doi: 10.1155/2013/850547. [Epub ahead of print: 18 Dec 2013].
  40. Marimuthu K, Ng TM, Teng C, Lim TP, Koh TH, Tan TY, et al. Risk factors and treatment outcome of ertapenem non-susceptible enterobacteriaceae bacteraemia. *J Infect* 2013;66:294-6. doi: 10.1016/j.jinf.2012.11.010. [Epub ahead of print: 28 Nov 2012].
  41. Mazza E, Prosperi M, Panzeri MF, Limuti R, Nichelatti M, De Gasperi A. Carbapenem-Resistant *Klebsiella pneumoniae* Infections Early After Liver Transplantation: A Single-Center Experience. *Transplant Proc* 2017;49:677-681.
  42. Miller BM, Johnson SW. Demographic and infection characteristics of patients with carbapenem-resistant Enterobacteriaceae in a community hospital: Development of a bedside clinical score for risk assessment. *Am J Infect Control* 2016;44:134-7. doi: 10.1016/j.ajic.2015.09.006. [Epub ahead of print: 20 Oct 2015].
  43. Mouloudi E, Massa E, Papadopoulos S, Iosifidis E, Roilides I, Theodoridou T, et al. Bloodstream infections caused by carbapenemase-producing *Klebsiella pneumoniae* among intensive care unit patients after orthotopic liver transplantation: risk factors for infection and impact of resistance on outcomes. *Transplant Proc* 2014;46:3216-8.
  44. Muggeo A, Guillard T, Barbe C, Thierry A, Bajolet O, Vernet-Garnier V, et al. Factors associated with carriage of carbapenem-non-susceptible Enterobacteriaceae in North-Eastern France and outcomes of infected patients. *J Antimicrob Chemother* 2017;72:1496-1501.
  45. Nouvenne A, Ticinesi A, Lauretani F, Maggio M, Lippi G, Guida L, et al. Comorbidities and disease severity as risk factors for carbapenem-resistant *Klebsiella pneumoniae* colonization: report of an experience in an internal medicine unit. *PLoS One* 2014;9:e110001.
  46. Orsi GB, Garcia-Fernandez A, Giordano A. Risk factors and clinical significance of ertapenem-resistant *Klebsiella pneumoniae* in hospitalised patients. *J Hosp Infect* 2011;78:54-8. doi: 10.1016/j.jhin.2011.01.014. [Epub ahead of print: 30 Mar 2011].
  47. Papadimitriou-Olivgeris M, Marangos M, Fligou F, Christofidou M, Sklavou C, Vamvakopoulou S, et al. KPC-producing *Klebsiella pneumoniae* enteric colonization acquired during intensive care unit stay: the significance of risk factors for its development and its impact on mortality. *Diagn Microbiol Infect Dis* 2013;77:169-73. doi: 10.1016/j.diagmicrobio.2013.06.007. [Epub ahead of print: 23 Jul 2013].

- 1  
2  
3  
4 48. Patel TS, Nagel JL. Clinical outcomes of Enterobacteriaceae infections stratified by  
5 carbapenem MICs. *J Clin Microbiol* 2015;53:201-5. doi: 10.1128/JCM.03057-14. [Epub  
6 ahead of print: 05 Nov 2014].
- 7  
8 49. Porwal R, Gopalakrishnan R, Rajesh NJ, Ramasubramanian V. Carbapenem resistant  
9 Gram-negative bacteremia in an Indian intensive care unit: A review of the clinical profile  
10 and treatment outcome of 50 patients. *Indian J Crit Care Med* 2014;18:750-3.
- 11  
12 50. Qureshi ZA, Syed A, Clarke LG, Doi Y, Shields RK. Epidemiology and clinical outcomes  
13 of patients with carbapenem-resistant *Klebsiella pneumoniae* bacteriuria. *Antimicrob  
14 Agents Chemother* 2014;58:3100-4. doi: 10.1128/AAC.02445-13. [Epub ahead of print:  
15 17 Mar 2014].
- 16  
17 51. Rodrigues Dos Santos BG, Amaral ES, Jr., Fernandes PF, Oliveira CM, Rodrigues JL,  
18 Perdigo Netto LV, et al. Urinary Tract Infections and Surgical Site Infections due to  
19 Carbapenem-Resistant Enterobacteriaceae in Renal Transplant. *Transplant Proc*  
20 2016;48:2050-5.
- 21  
22 52. Salsano A, Giacobbe DR, Sportelli E, Olivieri GM, Brega C, Di Biase C, et al. Risk  
23 factors for infections due to carbapenem-resistant *Klebsiella pneumoniae* after open heart  
24 surgery. *Interact Cardiovasc Thorac Surg* 2016;23:762-768. doi: 10.1093/icvts/ivw228.  
25 [Epub ahead of print: 01 Jul 2016].
- 26  
27 53. Segagni Lusignani L, Presterl E, Zatorska B, Van Den Nest M, Diab-Elschahawi M.  
28 Infection control and risk factors for acquisition of carbapenemase-producing  
29 enterobacteriaceae. A 5 year (2011-2016) case-control study. *Antimicrob Resist Infect  
30 Control* 2020;9:18.
- 31  
32 54. Shankar C, Kumar M, Baskaran A, Paul MM, Ponmudi N, Santhanam S, et al. Molecular  
33 characterisation for clonality and transmission dynamics of an outbreak of *Klebsiella  
34 pneumoniae* amongst neonates in a tertiary care centre in South India. *Indian J Med  
35 Microbiol* 2018;36:54-60.
- 36  
37 55. Taminato M, Fram D, Pereira RRF, Sesso R, Belasco AGS, Pignatari AC, et al. Infection  
38 related to *Klebsiella pneumoniae* producing carbapenemase in renal transplant patients.  
39 *Rev Bras Enferm* 2019;72:760-766.
- 40  
41 56. Tamma PD, Goodman KE, Harris AD, Tekle T, Roberts A, Taiwo A, et al. Comparing the  
42 Outcomes of Patients With Carbapenemase-Producing and  
43 Non-Carbapenemase-Producing Carbapenem-Resistant Enterobacteriaceae Bacteremia.  
44 *Clin Infect Dis* 2017;64:257-264. doi: 10.1093/cid/ciw741. [Epub ahead of print: 09 Nov  
45 2016].
- 46  
47 57. Tascini C, Lipsky BA, Iacopi E, Ripoli A, Sbrana F, Coppelli A, et al. KPC-producing  
48 *Klebsiella pneumoniae* rectal colonization is a risk factor for mortality in patients with  
49 diabetic foot infections. *Clin Microbiol Infect* 2015;21:790.e1-3. doi:  
50 10.1016/j.cmi.2015.04.010. [Epub ahead of print: 22 Apr 2015].
- 51  
52 58. Tsereteli M, Sidamonidze K, Tsereteli D, Malania L, Vashakidze E. EPIDEMIOLOGY  
53 OF CARBAPENEM-RESISTANT *KLEBSIELLA PNEUMONIAE* IN INTENSIVE  
54 CARE UNITS OF MULTIPROFILE HOSPITALS IN TBILISI, GEORGIA. *Georgian  
55 Med News* 2018;(280-281):164-168.
- 56  
57 59. Tumbarello M, Treccarichi EM, De Rosa FG, Giannella M, Giacobbe DR, Bassetti M, et al.  
58 Infections caused by KPC-producing *Klebsiella pneumoniae*: differences in therapy and  
59

- 1  
2  
3 mortality in a multicentre study. *J Antimicrob Chemother* 2015;70:2133-43. doi:  
4 10.1093/jac/dkv086. [Epub ahead of print: 21 Apr 2015].  
5  
6 60. Tumbarello M, Trecarichi EM, Tumietto F, Del Bono V, De Rosa FG, Bassetti M, et al.  
7 Predictive models for identification of hospitalized patients harboring KPC-producing  
8 *Klebsiella pneumoniae*. *Antimicrob Agents Chemother* 2014;58:3514-20. doi:  
9 10.1128/AAC.02373-13. [Epub ahead of print: 14 Apr 2014].  
10  
11 61. Tuon FF, Graf ME, Merlini A, Rocha JL, Stallbaum S, Arend LN, et al. Risk factors for  
12 mortality in patients with ventilator-associated pneumonia caused by  
13 carbapenem-resistant Enterobacteriaceae. *Braz J Infect Dis* 2017;21:1-6. doi:  
14 10.1016/j.bjid.2016.09.008. [Epub ahead of print: 04 Nov 2014].  
15  
16 62. Jamal WY, Albert MJ, Rotimi VO. High Prevalence of New Delhi  
17 Metallo-beta-Lactamase-1 (NDM-1) Producers among Carbapenem-Resistant  
18 Enterobacteriaceae in Kuwait. *PLoS One* 2016;11:e0152638.  
19  
20 63. Wang Q, Zhang Y, Yao X, Xian H, Liu Y, Li H, et al. Risk factors and clinical outcomes  
21 for carbapenem-resistant Enterobacteriaceae nosocomial infections. *Eur J Clin Microbiol*  
22 *Infect Dis* 2016;35:1679-89. doi: 10.1007/s10096-016-2710-0. [Epub ahead of print: 11  
23 Jul 2016].  
24  
25  
26  
27  
28  
29  
30  
31  
32  
33  
34  
35  
36  
37  
38  
39  
40  
41  
42  
43  
44  
45  
46  
47  
48  
49  
50  
51  
52  
53  
54  
55  
56  
57  
58  
59  
60

1  
2  
3  
4  
5  
6  
7  
8  
9  
10  
11  
12  
13  
14  
15  
16  
17  
18  
19  
20  
21  
22  
23  
24  
25  
26  
27  
28  
29  
30  
31  
32  
33  
34  
35  
36  
37  
38  
39  
40  
41  
42  
43  
44  
45  
46

### Appendix 3. Descriptive details of the 50 included studies

Table S1 Descriptive details of the 50 included studies

| First Author | Year | Country | Region  | Economic status     | Infection type          | Pathogen                 | Resistance type | Sample size (n) |     | Mortality measurements                          | Mortality (%) |       |
|--------------|------|---------|---------|---------------------|-------------------------|--------------------------|-----------------|-----------------|-----|-------------------------------------------------|---------------|-------|
|              |      |         |         |                     |                         |                          |                 | CRE             | CSE |                                                 | CRE           | CSE   |
| Alicino      | 2015 | Italy   | Europe  | High income         | bloodstream infection   | Klebsiella pneumoniae    | NA              | 349             | 162 | 30d mortality                                   | 36.1          | 23.5  |
| Balkhair     | 2019 | Oman    | Asia    | High income         | bloodstream infection   | Klebsiella pneumoniae    | NA              | 69              | 305 | 30d mortality                                   | 63.8          | 24.3  |
| Ben-David    | 2012 | Israel  | Asia    | High income         | bloodstream infection   | Klebsiella pneumoniae    | KPC-producing   | 42              | 85  | in-hospital mortality attributable to infection | 69            | 24    |
| Brizendine   | 2015 | USA     | America | High income         | urinary tract infection | Klebsiella pneumoniae    | NA              | 22              | 64  | in-hospital mortality                           | 18            | 2     |
| Chang        | 2019 | China   | Asia    | Upper middle income | bloodstream infection   | Klebsiella pneumoniae    | NA              | 46              | 239 | 28d mortality                                   | 50            | 14.6  |
|              |      |         |         |                     |                         |                          |                 |                 |     | 7d mortality                                    | 37            | 10.5  |
|              |      |         |         |                     |                         |                          |                 |                 |     | in-hospital mortality                           | 58.7          | 15.9  |
| Chang        | 2011 | China   | Asia    | Lower middle income | bloodstream infection   | Escherichia. coli        | NA              | 17              | 34  | in-hospital mortality                           | 94.12         | 50    |
|              |      |         |         |                     |                         |                          |                 |                 |     | 28d hospital mortality                          | 70.59         | 47.06 |
|              |      |         |         |                     |                         |                          |                 |                 |     | 14d hospital mortality                          | 47.06         | 38.24 |
| Chiotos      | 2018 | USA     | America | High income         | mixed                   | Mixed Enterobacteriaceae | NA              | 31              | 144 | 30d mortality                                   | 6.5           | 1.4   |

|                   |      |              |         |                     |                       |                          |               |     |      |                       |       |       |
|-------------------|------|--------------|---------|---------------------|-----------------------|--------------------------|---------------|-----|------|-----------------------|-------|-------|
| Cienfuegos-Gallet | 2019 | Colombia     | America | Upper middle income | mixed                 | Klebsiella pneumoniae    | KPC-producing | 49  | 289  | 30d mortality         | 32.65 | 15.92 |
| Correa            | 2013 | Brazil       | America | Upper middle income | mixed                 | Klebsiella pneumoniae    | NA            | 20  | 40   | in-hospital mortality | 50    | 27.5  |
| Cubero            | 2015 | Spain        | Europe  | High income         | mixed                 | Klebsiella pneumoniae    | OXA-producing | 20  | 9    | in-hospital mortality | 35    | 11.1  |
| Daikos            | 2009 | Greece       | Europe  | High income         | bloodstream infection | Klebsiella pneumoniae    | VIM-producing | 14  | 148  | 14d mortality         | 42.9  | 16.9  |
| Fraenkel-Wandel   | 2016 | Israel       | Asia    | High income         | bloodstream infection | Klebsiella pneumoniae    | KPC-producing | 68  | 136  | in-hospital mortality | 65    | 40    |
| Gallagher         | 2014 | USA          | America | High income         | bloodstream infection | Klebsiella pneumoniae    | NA            | 43  | 111  | in-hospital mortality | 45    | 32    |
| Garbati           | 2016 | Saudi Arabia | Asia    | High income         | mixed                 | Mixed Enterobacteriaceae | NA            | 29  | 58   | in-hospital mortality | 31    | 12.1  |
| Gomez Rueda       | 2014 | Colombia     | America | Upper middle income | mixed                 | Klebsiella pneumoniae    | NA            | 61  | 61   | in-hospital mortality | 50.8  | 32.7  |
| Hoxha             | 2016 | Italy        | Europe  | High income         | mixed                 | Klebsiella pneumoniae    | NA            | 49  | 49   | 30d mortality         | 61    | 20    |
|                   |      |              |         |                     |                       |                          |               |     |      | 6d mortality          | 24    | 8     |
| Huang             | 2018 | China        | Asia    | Upper middle income | mixed                 | Klebsiella pneumoniae    | NA            | 267 | 1328 | in-hospital mortality | 14.61 | 5.65  |



|            |      |        |         |                     |                       |                          |                                                                      |     |     |                                                              |                |                |
|------------|------|--------|---------|---------------------|-----------------------|--------------------------|----------------------------------------------------------------------|-----|-----|--------------------------------------------------------------|----------------|----------------|
| Hussein    | 2013 | Israel | Asia    | High income         | bloodstream infection | Klebsiella pneumoniae    | NA                                                                   | 103 | 214 | 30d mortality                                                | 43.7           | 29             |
| Kotb       | 2020 | Egypt  | Africa  | Lower middle income | mixed                 | Mixed Enterobacteriaceae | NA                                                                   | 871 | 727 | mortality in ICU                                             | 61.1           | 51.7           |
| Lee        | 2016 | Korea  | Asia    | High income         | mixed                 | Mixed Enterobacteriaceae | NA                                                                   | 37  | 37  | in-hospital mortality<br>28d mortality                       | 10.8<br>27     | 10.8<br>21.6   |
| Li         | 2019 | China  | Asia    | Upper middle income | mixed                 | Klebsiella pneumoniae    | NA                                                                   | 244 | 263 | 30d mortality in ICU                                         | 28.9           | 11             |
| Liu        | 2019 | China  | Asia    | Upper middle income | bloodstream infection | Klebsiella pneumoniae    | NA                                                                   | 20  | 69  | 30d mortality                                                | 55             | 15.9           |
| Liu        | 2012 | China  | Asia    | Lower middle income | bloodstream infection | Klebsiella pneumoniae    | NA                                                                   | 25  | 50  | in-hospital mortality<br>28d mortality<br>14d mortality      | 60<br>52<br>44 | 40<br>30<br>22 |
| Mclaughlin | 2014 | USA    | America | High income         | bloodstream infection | Klebsiella pneumoniae    | KPC-producing                                                        | 15  | 60  | in-hospital mortality                                        | 33.3           | 11.7           |
| Meng       | 2017 | China  | Asia    | Upper middle income | mixed                 | Escherichia. coli        | not focusing on a particular type of carbapenemase-producing strains | 49  | 96  | in-hospital mortality                                        | 12             | 1              |
| Mouloudi   | 2010 | Greece | Europe  | High income         | bloodstream infection | Klebsiella pneumoniae    | KPC-producing                                                        | 37  | 22  | in-hospital mortality<br>mortality attributable to infection | 68<br>27       | 41<br>14       |



|                |      |        |         |                     |                         |                          |               |    |     | mortality in ICU                    | 57    | 41    |
|----------------|------|--------|---------|---------------------|-------------------------|--------------------------|---------------|----|-----|-------------------------------------|-------|-------|
| Ny             | 2015 | USA    | America | High income         | mixed                   | Klebsiella pneumoniae    | NA            | 48 | 48  | in-hospital mortality               | 14.6  | 10.4  |
| Orsi           | 2013 | Italy  | Europe  | High income         | mixed                   | Klebsiella pneumoniae    | KPC-producing | 36 | 43  | in-hospital mortality               | 38.9  | 27.9  |
| Pan            | 2019 | China  | Asia    | Upper middle income | mixed                   | Klebsiella pneumoniae    | KPC-producing | 66 | 132 | in-hospital mortality               | 57.6  | 18.2  |
|                |      |        |         |                     |                         |                          |               |    |     | 28d mortality                       | 18.18 | 11.36 |
| Patel          | 2008 | USA    | America | High income         | mixed                   | Klebsiella pneumoniae    | NA            | 99 | 99  | in-hospital mortality               | 48    | 20    |
|                |      |        |         |                     |                         |                          |               |    |     | mortality attributable to infection | 38    | 12    |
| Pereira        | 2015 | USA    | America | High income         | mixed                   | Klebsiella pneumoniae    | NA            | 20 | 36  | in-hospital mortality               | 45    | 28    |
| Pouch          | 2015 | USA    | America | High income         | urinary tract infection | Mixed Enterobacteriaceae | NA            | 20 | 80  | in-hospital mortality               | 30    | 10    |
| Qureshi        | 2012 | USA    | America | High income         | bloodstream infection   | Klebsiella pneumoniae    | NA            | 19 | 51  | 28d mortality                       | 47.4  | 27.5  |
| Sánchez-Romero | 2011 | Spain  | Europe  | High income         | mixed                   | Klebsiella pneumoniae    | VIM-producing | 28 | 55  | 14d mortality                       | 46.4  | 30.9  |
| Schwaber       | 2008 | Israel | Asia    | High income         | mixed                   | Klebsiella pneumoniae    | NA            | 48 | 56  | in-hospital mortality               | 44    | 12.5  |

|                 |      |        |         |                     |                         |                          |               |     |     |                                     |      |      |
|-----------------|------|--------|---------|---------------------|-------------------------|--------------------------|---------------|-----|-----|-------------------------------------|------|------|
| Shilo           | 2013 | Israel | Asia    | High income         | urinary tract infection | Klebsiella pneumoniae    | NA            | 135 | 127 | in-hospital mortality               | 29   | 25   |
| Simkins         | 2014 | USA    | America | High income         | mixed                   | Klebsiella pneumoniae    | NA            | 13  | 39  | in-hospital mortality               | 46   | 8    |
| Tian            | 2016 | China  | Asia    | Upper middle income | bloodstream infection   | Klebsiella pneumoniae    | NA            | 33  | 81  | in-hospital mortality               | 42.4 | 19.8 |
|                 |      |        |         |                     |                         |                          |               |     |     | mortality attributable to infection | 42.4 | 24.6 |
|                 |      |        |         |                     |                         |                          |               |     |     | 28d mortality                       | 33.3 | 18.5 |
| Torres-Gonzalez | 2016 | Mexico | America | Upper middle income | mixed                   | Mixed Enterobacteriaceae | OXA-producing | 27  | 108 | mortality attributable to infection | 11.1 | 7.4  |
| Trecarichi      | 2016 | Italy  | Europe  | High income         | bloodstream infection   | Klebsiella pneumoniae    | NA            | 161 | 117 | 21d mortality                       | 52.2 | 14.5 |
| Ulu             | 2015 | Turkey | Asia    | Upper middle income | mixed                   | Klebsiella pneumoniae    | NA            | 47  | 51  | mortality in ICU                    | 44.7 | 51   |
| Vardakas        | 2015 | Greece | Europe  | High income         | mixed                   | Klebsiella pneumoniae    | NA            | 80  | 24  | mortality in ICU                    | 72.5 | 58.3 |
| Wang            | 2018 | China  | Asia    | Upper middle income | mixed                   | Klebsiella pneumoniae    | NA            | 48  | 48  | in-hospital mortality               | 47.9 | 4.2  |
| Xiao            | 2018 | China  | Asia    | Upper middle income | bloodstream infection   | Klebsiella pneumoniae    | NA            | 135 | 293 | 30d mortality                       | 58.5 | 15.4 |

|            |      |                              |                       |                                 |                         |                          |    |     |     |                                     |      |      |
|------------|------|------------------------------|-----------------------|---------------------------------|-------------------------|--------------------------|----|-----|-----|-------------------------------------|------|------|
| Zhang      | 2018 | China                        | Asia                  | Upper middle income             | bloodstream infection   | Klebsiella pneumoniae    | NA | 54  | 84  | in-hospital mortality               | 18.5 | 8.3  |
|            |      |                              |                       |                                 |                         |                          |    |     |     | 7d mortality                        | 16.7 | 1.2  |
|            |      |                              |                       |                                 |                         |                          |    |     |     | 28d mortality                       | 18.5 | 2.4  |
| Zheng      | 2018 | China                        | Asia                  | Upper middle income             | bloodstream infection   | Klebsiella pneumoniae    | NA | 59  | 230 | 28d mortality                       | 54.2 | 19.6 |
| Zheng      | 2020 | China                        | Asia                  | Upper middle income             | neurosurgical infection | Mixed Enterobacteriaceae | NA | 26  | 107 | mortality attributable to infection | 69.2 | 12.1 |
| Zuo        | 2020 | China                        | Asia                  | Upper middle income             | pneumonia               | Klebsiella pneumoniae    | NA | 74  | 74  | in-hospital mortality               | 35.1 | 20.3 |
|            |      |                              |                       |                                 |                         |                          |    |     |     | mortality attributable to infection | 25.7 | 9.5  |
| Villegas   | 2016 | 7 countries in Latin America | America               | Upper middle income             | bloodstream infection   | Mixed Enterobacteriaceae | NA | 53  | 202 | in-hospital mortality               | 64   | 30   |
|            |      |                              |                       |                                 |                         |                          |    |     |     | mortality attributable to infection | 85   | 43   |
| Stewardson | 2019 | 10 countries                 | Asia, Africa, America | low and middle income countries | bloodstream infection   | Mixed Enterobacteriaceae | NA | 123 | 174 | in-hospital mortality               | 35   | 20   |

OXA, oxacillinase; KPC, Klebsiella pneumoniae carbapenemase; VIM, Verona integron-encoded MBL; NA, Not Applicable i.e. include non-carbapenemase-producing strains or not focusing on a particular type of carbapenemase-producing strains

## Appendix 4. Risk of bias assessed with the Newcastle-Ottawa Assessment Scale.

### NEWCASTLE - OTTAWA QUALITY ASSESSMENT SCALE COHORT STUDIES

Note: A study can be awarded a maximum of one star for each numbered item within the Selection and Outcome categories. A maximum of two stars can be given for Comparability. In this version of NOS, we define the exposure as carbapenem resistance and the outcome as death in hospital and the target population is patients infected with *Enterobacteriaceae*.

#### **Selection:** (Maximum 4 stars)

##### 1) Representativeness of the exposed cohort

- a) truly representative of the average carbapenem resistance in patients infected with *Enterobacteriaceae*. \*
- b) somewhat representative of the average carbapenem resistance in patients infected with *Enterobacteriaceae* \*
- c) selected group of users (e.g. organ transplant recipients, onco-hematological patients)
- d) no description of the derivation of the cohort

##### 2) Selection of the non exposed cohort

- a) drawn from the same community as the exposed cohort \*
- b) drawn from a different source
- c) no description of the derivation of the non exposed cohort

##### 3) Ascertainment of exposure

- a) secure record (e.g. medical records) \*
- b) structured interview \*
- c) written self report
- d) no description

##### 4) Demonstration that outcome of interest was not present at start of study

1  
2  
3  
4  
5 a) yes ✱

6 b) no  
7

8 **Comparability:** (Maximum 2 stars)  
9

10 1) Comparability of cohorts on the basis of the design or analysis

11 a) study controls for age ✱

12 b) study controls for comorbidity ✱  
13  
14

15 **Outcome:** (Maximum 3 stars)  
16

17 1) Assessment of outcome

18 a) independent blind assessment ✱

19 b) record linkage ✱

20 c) self report

21 d) no description  
22  
23

24 2) Was follow-up long enough for outcomes to occur

25 a) yes (adequate if >14 days) ✱

26 b) no  
27  
28

29 3) Adequacy of follow up of cohorts

30 a) complete follow up - all subjects accounted for ✱

31 b) subjects lost to follow up unlikely to introduce bias - small number lost - > 80 % follow up, or description provided of those lost ✱

32 c) follow up rate < 80% and no description of those lost

33 d) no statement  
34  
35  
36  
37  
38  
39  
40  
41  
42  
43  
44  
45  
46

1  
2  
3  
4  
5  
6  
7  
8  
9  
10  
11  
12  
13  
14  
15  
16  
17  
18  
19  
20  
21  
22  
23  
24  
25  
26  
27  
28  
29  
30  
31  
32  
33  
34  
35  
36  
37  
38  
39  
40  
41  
42  
43  
44  
45  
46

| First Author      | Year | selection(1) | selection(2) | selection(3) | selection(4) | comparability(1) | outcome(1) | outcome(2) | outcome(3) | Total score | Risk of bias |
|-------------------|------|--------------|--------------|--------------|--------------|------------------|------------|------------|------------|-------------|--------------|
| Alicino           | 2015 | 1            | 1            | 1            | 1            | 0                | 1          | 1          | 1          | 7           | Low          |
| Balkhair          | 2019 | 1            | 1            | 1            | 1            | 0                | 1          | 1          | 1          | 7           | Low          |
| Ben-David         | 2012 | 1            | 1            | 1            | 1            | 1                | 1          | 1          | 1          | 8           | Low          |
| Brizendine        | 2015 | 0            | 1            | 1            | 1            | 1                | 1          | 1          | 1          | 7           | Low          |
| Chang             | 2019 | 1            | 1            | 1            | 1            | 0                | 1          | 1          | 1          | 7           | Low          |
| Chang             | 2011 | 1            | 1            | 1            | 1            | 1                | 1          | 1          | 1          | 8           | Low          |
| Chiotos           | 2018 | 0            | 1            | 1            | 1            | 1                | 1          | 1          | 1          | 7           | Low          |
| Cienfuegos-Gallet | 2019 | 1            | 1            | 1            | 1            | 1                | 1          | 1          | 1          | 8           | Low          |
| Correa            | 2013 | 1            | 1            | 1            | 1            | 1                | 1          | 1          | 1          | 8           | Low          |
| Cubero            | 2015 | 1            | 1            | 1            | 1            | 0                | 1          | 1          | 1          | 7           | Low          |
| Daikos            | 2009 | 1            | 1            | 1            | 1            | 0                | 1          | 0          | 1          | 6           | Moderate     |
| Fraenkel-Wandel   | 2016 | 1            | 1            | 1            | 1            | 1                | 1          | 1          | 1          | 8           | Low          |
| Gallagher         | 2014 | 1            | 1            | 1            | 1            | 0                | 1          | 1          | 1          | 7           | Low          |
| Garbati           | 2016 | 1            | 1            | 1            | 1            | 0                | 1          | 1          | 1          | 7           | Low          |
| Gomez Rueda       | 2014 | 1            | 1            | 1            | 1            | 0                | 1          | 1          | 1          | 7           | Low          |
| Hoxha             | 2016 | 1            | 1            | 1            | 1            | 1                | 1          | 1          | 0          | 7           | Low          |
| Huang             | 2018 | 1            | 1            | 1            | 1            | 2                | 1          | 1          | 1          | 9           | Low          |
| Hussein           | 2013 | 1            | 1            | 1            | 1            | 1                | 1          | 1          | 1          | 8           | Low          |
| Kotb              | 2020 | 1            | 1            | 1            | 1            | 0                | 1          | 1          | 1          | 7           | Low          |
| Lee               | 2016 | 1            | 1            | 1            | 1            | 1                | 1          | 1          | 1          | 8           | Low          |
| Li                | 2019 | 0            | 1            | 1            | 1            | 1                | 1          | 1          | 1          | 7           | Low          |
| Liu               | 2019 | 0            | 1            | 1            | 1            | 1                | 1          | 1          | 1          | 7           | Low          |

|    |                 |      |   |   |   |   |   |   |   |   |   |   |          |
|----|-----------------|------|---|---|---|---|---|---|---|---|---|---|----------|
| 1  |                 |      |   |   |   |   |   |   |   |   |   |   |          |
| 2  |                 |      |   |   |   |   |   |   |   |   |   |   |          |
| 3  |                 |      |   |   |   |   |   |   |   |   |   |   |          |
| 4  |                 |      |   |   |   |   |   |   |   |   |   |   |          |
| 5  | Liu             | 2012 | 1 | 1 | 1 | 1 | 1 | 1 | 1 | 1 | 1 | 8 | Low      |
| 6  | Mclaughlin      | 2014 | 1 | 1 | 1 | 1 | 1 | 1 | 1 | 1 | 1 | 8 | Low      |
| 7  | Meng            | 2017 | 1 | 1 | 1 | 1 | 1 | 1 | 1 | 1 | 1 | 8 | Low      |
| 8  | Mouloudi        | 2010 | 0 | 1 | 1 | 1 | 1 | 1 | 1 | 1 | 1 | 7 | Low      |
| 9  | Ny              | 2015 | 1 | 1 | 1 | 1 | 1 | 1 | 1 | 1 | 1 | 8 | Low      |
| 10 | Orsi            | 2013 | 1 | 1 | 1 | 1 | 1 | 1 | 1 | 1 | 1 | 8 | Low      |
| 11 | Pan             | 2019 | 1 | 1 | 1 | 1 | 1 | 1 | 1 | 1 | 1 | 8 | Low      |
| 12 | Patel           | 2008 | 1 | 1 | 1 | 1 | 1 | 1 | 1 | 1 | 1 | 8 | Low      |
| 13 | Pereira         | 2015 | 0 | 1 | 1 | 1 | 1 | 1 | 1 | 1 | 1 | 7 | Low      |
| 14 | Pouch           | 2015 | 0 | 1 | 1 | 1 | 1 | 1 | 1 | 1 | 1 | 7 | Low      |
| 15 | Qureshi         | 2012 | 1 | 1 | 1 | 1 | 0 | 1 | 1 | 1 | 1 | 7 | Low      |
| 16 | Sánchez-Romero  | 2011 | 1 | 1 | 1 | 1 | 0 | 1 | 0 | 1 | 1 | 6 | Moderate |
| 17 | Schwaber        | 2008 | 1 | 1 | 1 | 1 | 0 | 1 | 1 | 1 | 1 | 7 | Low      |
| 18 | Shilo           | 2013 | 1 | 1 | 1 | 1 | 1 | 1 | 1 | 1 | 1 | 8 | Low      |
| 19 | Simkins         | 2014 | 0 | 1 | 1 | 1 | 1 | 1 | 1 | 1 | 1 | 7 | Low      |
| 20 | Tian            | 2016 | 1 | 1 | 1 | 1 | 1 | 1 | 1 | 1 | 1 | 8 | Low      |
| 21 | Torres-Gonzalez | 2016 | 1 | 1 | 1 | 1 | 0 | 1 | 1 | 1 | 1 | 7 | Low      |
| 22 | Trecarichi      | 2016 | 0 | 1 | 1 | 1 | 0 | 1 | 1 | 1 | 1 | 6 | Moderate |
| 23 | Ulu             | 2015 | 0 | 1 | 1 | 1 | 1 | 1 | 1 | 1 | 1 | 7 | Low      |
| 24 | Vardakas        | 2015 | 0 | 1 | 1 | 1 | 1 | 1 | 1 | 1 | 1 | 7 | Low      |
| 25 | Wang            | 2018 | 1 | 1 | 1 | 1 | 1 | 1 | 1 | 1 | 1 | 8 | Low      |
| 26 | Xiao            | 2018 | 1 | 1 | 1 | 1 | 1 | 1 | 1 | 1 | 1 | 8 | Low      |
| 27 | Zhang, Y.       | 2018 | 0 | 1 | 1 | 1 | 0 | 1 | 1 | 1 | 1 | 6 | Mod      |
| 28 | Zheng, Si-Han   | 2018 | 1 | 1 | 1 | 1 | 1 | 1 | 1 | 1 | 1 | 8 | Low      |
| 29 | Zheng, Guanghui | 2020 | 0 | 1 | 1 | 1 | 1 | 1 | 1 | 1 | 1 | 7 | Low      |
| 30 |                 |      |   |   |   |   |   |   |   |   |   |   |          |
| 31 |                 |      |   |   |   |   |   |   |   |   |   |   |          |
| 32 |                 |      |   |   |   |   |   |   |   |   |   |   |          |
| 33 |                 |      |   |   |   |   |   |   |   |   |   |   |          |
| 34 |                 |      |   |   |   |   |   |   |   |   |   |   |          |
| 35 |                 |      |   |   |   |   |   |   |   |   |   |   |          |
| 36 |                 |      |   |   |   |   |   |   |   |   |   |   |          |
| 37 |                 |      |   |   |   |   |   |   |   |   |   |   |          |
| 38 |                 |      |   |   |   |   |   |   |   |   |   |   |          |
| 39 |                 |      |   |   |   |   |   |   |   |   |   |   |          |
| 40 |                 |      |   |   |   |   |   |   |   |   |   |   |          |
| 41 |                 |      |   |   |   |   |   |   |   |   |   |   |          |
| 42 |                 |      |   |   |   |   |   |   |   |   |   |   |          |
| 43 |                 |      |   |   |   |   |   |   |   |   |   |   |          |
| 44 |                 |      |   |   |   |   |   |   |   |   |   |   |          |
| 45 |                 |      |   |   |   |   |   |   |   |   |   |   |          |
| 46 |                 |      |   |   |   |   |   |   |   |   |   |   |          |

1  
2  
3  
4  
5  
6  
7  
8  
9  
10  
11  
12  
13  
14  
15  
16  
17  
18  
19  
20  
21  
22  
23  
24  
25  
26  
27  
28  
29  
30  
31  
32  
33  
34  
35  
36  
37  
38  
39  
40  
41  
42  
43  
44  
45  
46

|            |      |   |   |   |   |   |   |   |   |   |   |     |
|------------|------|---|---|---|---|---|---|---|---|---|---|-----|
| Zuo        | 2020 | 1 | 1 | 1 | 1 | 1 | 1 | 1 | 1 | 1 | 8 | Low |
| Villegas   | 2016 | 1 | 1 | 1 | 1 | 1 | 1 | 1 | 1 | 1 | 8 | Low |
| Stewardson | 2019 | 1 | 1 | 1 | 1 | 2 | 1 | 1 | 1 | 1 | 9 | Low |

For peer review only



## Appendix 5. The results from stratified analysis and meta-regression for different mortality outcome type

Table S2 Subgroup analysis of the effect of carbapenem resistance on in-hospital mortality for patients infected with Enterobacteriaceae

| Sub-groups                         | No. of studies | No. of CRE patients | No. of CSE patients | unweighted means of mortality among CRE patients | unweighted means of mortality among CSE patients | RR(95%CI)         | <i>P</i> value (significance tests of RR=1) | I <sup>2</sup> (%) | <i>P</i> value between groups | RD(95%CI)         | <i>P</i> value (significance tests of RD=0) | I <sup>2</sup> (%) | <i>P</i> value between groups |
|------------------------------------|----------------|---------------------|---------------------|--------------------------------------------------|--------------------------------------------------|-------------------|---------------------------------------------|--------------------|-------------------------------|-------------------|---------------------------------------------|--------------------|-------------------------------|
| <b>Pathogens</b>                   |                |                     |                     |                                                  |                                                  |                   |                                             |                    |                               |                   |                                             |                    |                               |
| Klebsiella pneumoniae              | 24             | 1340                | 3072                | 43.10%                                           | 20.26%                                           | 2.12(1.77, 2.53)  | 0.000                                       | 57.4               |                               | 0.22(0.16, 0.28)  | 0.000                                       | 72.3               |                               |
| Mixed Enterobacteriaceae pathogens | 5              | 262                 | 551                 | 34.16%                                           | 16.58%                                           | 2.01(1.62, 2.49)  | 0.000                                       | 0.0                | <b>0.161</b>                  | 0.17(0.06, 0.29)  | 0.003                                       | 65.8               | <b>0.591</b>                  |
| Escherichia. coli                  | 2              | 66                  | 130                 | 53.06%                                           | 25.50%                                           | 3.83(0.46, 31.78) | 0.214                                       | 76.2               |                               | 0.27(-0.06, 0.59) | 0.115                                       | 88.6               |                               |
| <b>Geographical region</b>         |                |                     |                     |                                                  |                                                  |                   |                                             |                    |                               |                   |                                             |                    |                               |
| America                            | 11             | 414                 | 840                 | 40.43%                                           | 19.30%                                           | 1.97(1.60, 2.43)  | 0.000                                       | 22.2               |                               | 0.20(0.14, 0.27)  | 0.000                                       | 28.2               |                               |
| Europe                             | 3              | 93                  | 74                  | 47.30%                                           | 26.67%                                           | 1.58(1.06, 2.38)  | 0.026                                       | 0.0                | <b>0.781</b>                  | 0.19(0.05, 0.33)  | 0.009                                       | 0.0                | <b>0.832</b>                  |
| Asia                               | 16             | 1038                | 2665                | 43.11%                                           | 19.23%                                           | 2.28(1.81, 2.85)  | 0.000                                       | 65.4               |                               | 0.23(0.15, 0.31)  | 0.000                                       | 82.7               |                               |
| <b>Economic status</b>             |                |                     |                     |                                                  |                                                  |                   |                                             |                    |                               |                   |                                             |                    |                               |
| High income                        | 17             | 732                 | 1110                | 39.45%                                           | 19.21%                                           | 1.94(1.57, 2.40)  | 0.000                                       | 42.5               |                               | 0.19(0.13, 0.26)  | 0.000                                       | 57.8               |                               |
| Upper middle income                | 13             | 813                 | 2469                | 46.59%                                           | 21.04%                                           | 2.29(1.85, 2.82)  | 0.000                                       | 55.2               | <b>0.494</b>                  | 0.25(0.16, 0.34)  | 0.000                                       | 81.8               | <b>0.263</b>                  |
| <b>Infection type</b>              |                |                     |                     |                                                  |                                                  |                   |                                             |                    |                               |                   |                                             |                    |                               |
| Bloodstream infections             | 12             | 556                 | 1278                | 54.42%                                           | 27.73%                                           | 2.01(1.68, 2.41)  | 0.000                                       | 50.7               | <b>0.323</b>                  | 0.26(0.19, 0.34)  | 0.000                                       | 61.7               | <b>0.355</b>                  |

1  
2  
3  
4  
5  
6  
7  
8  
9  
10  
11  
12  
13  
14  
15  
16  
17  
18  
19  
20  
21  
22  
23  
24  
25  
26  
27  
28  
29  
30  
31  
32  
33  
34  
35  
36  
37  
38  
39  
40  
41  
42  
43  
44  
45  
46

|                                                                           |           |             |             |               |               |                         |              |             |                         |                  |             |      |
|---------------------------------------------------------------------------|-----------|-------------|-------------|---------------|---------------|-------------------------|--------------|-------------|-------------------------|------------------|-------------|------|
| Urinary tract infection                                                   | 3         | 177         | 271         | 25.67%        | 12.33%        | 2.40(0.82, 7.03)        | 0.110        | 72.5        | 0.11(0.00, 0.21)        | 0.044            | 29.7        |      |
| Pneumonia                                                                 | 1         | 74          | 74          | 35.10%        | 20.30%        | 1.73(1.00, 3.00)        | 0.049        | NA          | 0.15(0.01, 0.29)        | 0.040            | NA          |      |
| Mixed                                                                     | 15        | 861         | 2130        | 36.41%        | 15.34%        | 2.34(1.83, 2.97)        | 0.000        | 40.8        | 0.20(0.13, 0.28)        | 0.000            | 74.7        |      |
| <b>Resistance type</b>                                                    |           |             |             |               |               |                         |              |             |                         |                  |             |      |
| KPC-producing Enterobacteriaceae                                          | 6         | 264         | 478         | 55.30%        | 27.13%        | 2.13(1.56, 2.89)        | 0.000        | 58.7        | 0.30(0.20, 0.40)        | 0.000            | 46.2        |      |
| OXA-producing Enterobacteriaceae                                          | 1         | 20          | 9           | 35.00%        | 11.10%        | 3.15(0.45, 21.96)       | 0.247        | NA          | 0.24(-0.05, 0.53)       | 0.110            | NA          |      |
| include non-carbapenemas e-producing strains or multiple resistance types | 24        | 1384        | 3266        | 39.36%        | 18.59%        | 2.08(1.75, 2.47)        | 0.000        | 51.5        | 0.20(0.14, 0.25)        | 0.000            | 69.8        |      |
| <b>Sample size</b>                                                        |           |             |             |               |               |                         |              |             |                         |                  |             |      |
| <100                                                                      | 14        | 387         | 588         | 42.33%        | 20.34%        | 1.96(1.52, 2.53)        | 0.000        | 30.6        | 0.21(0.13, 0.30)        | 0.000            | 58.3        |      |
| 100-200                                                                   | 11        | 589         | 959         | 41.13%        | 18.07%        | 2.26(1.80, 2.84)        | 0.000        | 41.7        | <b>0.641</b>            | 0.23(0.15, 0.30) | 0.000       | 64.8 |
| >200                                                                      | 6         | 692         | 2206        | 44.39%        | 22.76%        | 2.02(1.49, 2.72)        | 0.000        | 78.4        | 0.21(0.09, 0.32)        | 0.000            | 85.5        |      |
| <b>Range of publication year</b>                                          |           |             |             |               |               |                         |              |             |                         |                  |             |      |
| 2008-2010                                                                 | 3         | 184         | 177         | 53.33%        | 24.50%        | 2.28(1.57, 3.31)        | 0.000        | 24.7        | 0.29(0.20, 0.38)        | 0.000            | 0.0         |      |
| 2011-2013                                                                 | 6         | 275         | 379         | 56.84%        | 32.40%        | 1.71(1.29, 2.28)        | 0.000        | 54.7        | <b>0.278</b>            | 0.24(0.08, 0.41) | 0.004       | 79.3 |
| 2014-2016                                                                 | 14        | 482         | 1022        | 37.92%        | 18.47%        | 1.86(1.57, 2.20)        | 0.000        | 11.5        | 0.18(0.12, 0.24)        | 0.000            | 35.1        |      |
| 2017-2020                                                                 | 8         | 727         | 2175        | 34.93%        | 11.69%        | 2.74(2.00, 3.75)        | 0.000        | 60.0        | 0.22(0.12, 0.32)        | 0.000            | 86.1        |      |
| <b>Total</b>                                                              | <b>31</b> | <b>1668</b> | <b>3753</b> | <b>42.30%</b> | <b>20.00%</b> | <b>2.09(1.81, 2.42)</b> | <b>0.000</b> | <b>49.8</b> | <b>0.22(0.17, 0.26)</b> | <b>0.000</b>     | <b>71.0</b> |      |

OXA, oxacillinase; KPC, Klebsiella pneumoniae carbapenemase

Table S3 Subgroup analysis of the effect of carbapenem resistance on 28d or 30d mortality for patients infected with Enterobacteriaceae

| Sub-groups                         | No. of studies | No. of CRE patients | No. of CSE patients | unweighted means of mortality among CRE patients | unweighted means of mortality among CSE patients | RR(95%CI)        | <i>P</i> value (significance tests of RR=1) | I <sup>2</sup> (%) | <i>P</i> value between groups | RD(95%CI)         | <i>P</i> value (significance tests of RD=0) | I <sup>2</sup> (%) | <i>P</i> value between groups |
|------------------------------------|----------------|---------------------|---------------------|--------------------------------------------------|--------------------------------------------------|------------------|---------------------------------------------|--------------------|-------------------------------|-------------------|---------------------------------------------|--------------------|-------------------------------|
| <b>Pathogens</b>                   |                |                     |                     |                                                  |                                                  |                  |                                             |                    |                               |                   |                                             |                    |                               |
| Klebsiella pneumoniae              | 14             | 1076                | 2248                | 44.60%                                           | 19.14%                                           | 2.34(1.90, 2.88) | 0.000                                       | 65.9               |                               | 0.25(0.18, 0.32)  | 0.000                                       | 76.9               |                               |
| Mixed Enterobacteriaceae pathogens | 2              | 68                  | 181                 | 16.75%                                           | 11.50%                                           | 1.78(0.57, 5.60) | 0.321                                       | 34.3               | <b>0.761</b>                  | 0.05(-0.03, 0.13) | 0.213                                       | 0.0                | <b>0.124</b>                  |
| Escherichia coli                   | 1              | 17                  | 34                  | 70.59%                                           | 47.06%                                           | 1.50(0.94, 2.40) | 0.091                                       | NA                 |                               | 0.24(-0.04, 0.51) | 0.092                                       | NA                 |                               |
| <b>Geographical region</b>         |                |                     |                     |                                                  |                                                  |                  |                                             |                    |                               |                   |                                             |                    |                               |
| America                            | 3              | 99                  | 484                 | 28.85%                                           | 14.94%                                           | 2.00(1.37, 2.92) | 0.000                                       | 0.0                |                               | 0.12(-0.00, 0.23) | 0.055                                       | 50.1               |                               |
| Europe                             | 2              | 398                 | 211                 | 48.55%                                           | 21.75%                                           | 2.04(1.07, 3.90) | 0.030                                       | 73.6               | <b>0.927</b>                  | 0.26(-0.02, 0.53) | 0.068                                       | 87.5               | <b>0.441</b>                  |
| Asia                               | 12             | 664                 | 1768                | 45.40%                                           | 20.81%                                           | 2.31(1.81, 2.94) | 0.000                                       | 68.4               |                               | 0.25(0.16, 0.34)  | 0.000                                       | 77.0               |                               |
| <b>Economic status</b>             |                |                     |                     |                                                  |                                                  |                  |                                             |                    |                               |                   |                                             |                    |                               |
| High income                        | 7              | 657                 | 962                 | 40.79%                                           | 21.04%                                           | 1.92(1.46, 2.52) | 0.000                                       | 57.6               |                               | 0.19(0.08, 0.30)  | 0.001                                       | 80.6               |                               |
| Upper middle income                | 10             | 504                 | 1501                | 44.29%                                           | 19.07%                                           | 2.48(1.92, 3.20) | 0.000                                       | 58.9               | <b>0.427</b>                  | 0.25(0.16, 0.35)  | 0.000                                       | 75.7               | <b>0.414</b>                  |
| <b>Infection type</b>              |                |                     |                     |                                                  |                                                  |                  |                                             |                    |                               |                   |                                             |                    |                               |
| Bloodstream infections             | 12             | 929                 | 1812                | 48.59%                                           | 22.31%                                           | 2.29(1.81, 2.90) | 0.000                                       | 72.0               | <b>0.746</b>                  | 0.26(0.18, 0.34)  | 0.000                                       | 73.2               | <b>0.108</b>                  |
| Mixed                              | 5              | 232                 | 651                 | 29.07%                                           | 14.06%                                           | 2.05(1.50, 2.81) | 0.000                                       | 4.2                |                               | 0.14(0.02, 0.26)  | 0.019                                       | 74.5               |                               |

1  
2  
3  
4  
5  
6  
7  
8  
9  
10  
11  
12  
13  
14  
15  
16  
17  
18  
19  
20  
21  
22  
23  
24  
25  
26  
27  
28  
29  
30  
31  
32  
33  
34  
35  
36  
37  
38  
39  
40  
41  
42  
43  
44  
45  
46

| <b>Resistance type</b>                                                   |           |             |             |               |               |                         |              |             |              |                         |              |              |              |
|--------------------------------------------------------------------------|-----------|-------------|-------------|---------------|---------------|-------------------------|--------------|-------------|--------------|-------------------------|--------------|--------------|--------------|
| KPC-producing                                                            |           |             |             |               |               |                         |              |             |              |                         |              |              |              |
| Enterobacteriaceae                                                       | 2         | 115         | 421         | 25.42%        | 13.64%        | 1.89(1.27, 2.82)        | 0.002        | 0.0         |              | 0.11(0.01, 0.21)        | 0.030        | 22.9         |              |
|                                                                          |           |             |             |               |               |                         |              |             |              | <b>0.428</b>            |              | <b>0.211</b> |              |
| include non-carbapenemase-producing strains or multiple resistance types | 15        | 1046        | 2042        | 45.17%        | 20.72%        | 2.29(1.84, 2.84)        | 0.000        | 67.2        |              | 0.24(0.16, 0.32)        | 0.000        | 79.5         |              |
| <b>Sample size</b>                                                       |           |             |             |               |               |                         |              |             |              |                         |              |              |              |
| <100                                                                     | 6         | 167         | 290         | 52.17%        | 27.01%        | 1.97(1.45, 2.67)        | 0.000        | 33.6        |              | 0.25(0.14, 0.37)        | 0.000        | 41.3         |              |
| 100-200                                                                  | 4         | 184         | 441         | 19.12%        | 8.42%         | 2.30(1.25, 4.24)        | 0.008        | 34.6        | <b>0.207</b> | 0.09(0.04, 0.15)        | 0.001        | 3.7          | <b>0.088</b> |
| >200                                                                     | 7         | 810         | 1732        | 48.42%        | 20.33%        | 2.39(1.80, 3.18)        | 0.000        | 80.1        |              | 0.28(0.17, 0.39)        | 0.000        | 83.5         |              |
| <b>Range of publication year</b>                                         |           |             |             |               |               |                         |              |             |              |                         |              |              |              |
| 2011-2013                                                                | 4         | 164         | 329         | 53.42%        | 33.39%        | 1.56(1.25, 1.94)        | 0.000        | 0.0         |              | 0.17(0.08, 0.26)        | 0.000        | 0.0          |              |
| 2014-2016                                                                | 4         | 468         | 349         | 39.35%        | 20.90%        | 1.79(1.28, 2.49)        | 0.001        | 32.6        | <b>0.060</b> | 0.18(0.05, 0.32)        | 0.009        | 67.9         | <b>0.568</b> |
| 2017-2020                                                                | 9         | 529         | 1785        | 39.70%        | 13.43%        | 2.91(2.41, 3.51)        | 0.000        | 29.1        |              | 0.26(0.14, 0.37)        | 0.000        | 88.0         |              |
| <b>Total</b>                                                             | <b>17</b> | <b>1161</b> | <b>2463</b> | <b>42.85%</b> | <b>19.88%</b> | <b>2.23(1.83, 2.72)</b> | <b>0.000</b> | <b>63.6</b> |              | <b>0.23(0.15, 0.30)</b> | <b>0.000</b> | <b>79.1</b>  |              |

KPC, Klebsiella pneumoniae carbapenemase

Table S4 Subgroup analysis of the effect of carbapenem resistance on mortality attributable to infection for patients infected with Enterobacteriaceae

| Sub-groups                         | No. of studies | No. of CRE patients | No. of CSE patients | unweighted means of mortality among CRE patients | unweighted means of mortality among CSE patients | RR(95%CI)         | P value (significance tests of RR=1) | I <sup>2</sup> (%) | P value between groups | RD(95%CI)         | P value (significance tests of RD=0) | I <sup>2</sup> (%) | P value between groups |
|------------------------------------|----------------|---------------------|---------------------|--------------------------------------------------|--------------------------------------------------|-------------------|--------------------------------------|--------------------|------------------------|-------------------|--------------------------------------|--------------------|------------------------|
| <b>Pathogens</b>                   |                |                     |                     |                                                  |                                                  |                   |                                      |                    |                        |                   |                                      |                    |                        |
| Klebsiella pneumoniae              | 5              | 285                 | 361                 | 36.22%                                           | 15.42%                                           | 2.81(2.06, 3.82)  | 0.000                                | 0.0                |                        | 0.23(0.16, 0.29)  | 0.000                                | 0.0                |                        |
| Mixed Enterobacteriaceae pathogens | 3              | 106                 | 417                 | 55.10%                                           | 20.83%                                           | 2.72(1.17, 6.32)  | 0.020                                | 84.6               | <b>0.739</b>           | 0.34(0.02, 0.65)  | 0.036                                | 93.3               | <b>0.388</b>           |
| <b>Geographical region</b>         |                |                     |                     |                                                  |                                                  |                   |                                      |                    |                        |                   |                                      |                    |                        |
| America                            | 3              | 179                 | 409                 | 44.70%                                           | 20.80%                                           | 2.27(1.41, 3.68)  | 0.001                                | 52.4               |                        | 0.24(0.03, 0.46)  | 0.026                                | 89.5               |                        |
| Europe                             | 1              | 37                  | 22                  | 27.00%                                           | 14.00%                                           | 1.98(0.61, 6.43)  | 0.255                                | NA                 | <b>0.484</b>           | 0.13(-0.07, 0.34) | 0.195                                | NA                 | <b>0.641</b>           |
| Asia                               | 4              | 175                 | 347                 | 46.33%                                           | 15.80%                                           | 3.32(2.22, 4.97)  | 0.000                                | 38.8               |                        | 0.32(0.14, 0.49)  | 0.000                                | 77.4               |                        |
| <b>Economic status</b>             |                |                     |                     |                                                  |                                                  |                   |                                      |                    |                        |                   |                                      |                    |                        |
| High income                        | 3              | 178                 | 206                 | 37.67%                                           | 14.33%                                           | 2.99(2.01, 4.43)  | 0.000                                | 0.0                |                        | 0.26(0.17, 0.34)  | 0.000                                | 0.0                |                        |
| Upper middle income                | 5              | 213                 | 572                 | 46.68%                                           | 19.32%                                           | 2.68(1.66, 4.32)  | 0.000                                | 70.4               | <b>0.932</b>           | 0.28(0.10, 0.47)  | 0.002                                | 87.7               | <b>0.725</b>           |
| <b>Infection type</b>              |                |                     |                     |                                                  |                                                  |                   |                                      |                    |                        |                   |                                      |                    |                        |
| Bloodstream infections             | 4              | 165                 | 390                 | 50.60%                                           | 24.65%                                           | 2.08(1.75, 2.48)  | 0.000                                | 0.0                |                        | 0.30(0.18, 0.42)  | 0.000                                | 53.4               |                        |
| Pneumonia                          | 1              | 74                  | 74                  | 25.70%                                           | 9.50%                                            | 2.71(1.21, 6.07)  | 0.015                                | NA                 | <b>0.075</b>           | 0.16(0.04, 0.28)  | 0.008                                | NA                 | <b>0.203</b>           |
| Neurosurgical infection            | 1              | 26                  | 107                 | 69.20%                                           | 12.10%                                           | 5.70(3.22, 10.08) | 0.000                                | NA                 |                        | 0.57(0.38, 0.76)  | 0.000                                | NA                 |                        |

|                                                                           |   |     |     |        |        |                         |              |             |              |                         |              |             |              |
|---------------------------------------------------------------------------|---|-----|-----|--------|--------|-------------------------|--------------|-------------|--------------|-------------------------|--------------|-------------|--------------|
| Mixed                                                                     | 2 | 126 | 207 | 24.55% | 9.70%  | 2.75(1.32, 5.71)        | 0.007        | 27.2        |              | 0.16(-0.08, 0.40)       | 0.200        | 87.2        |              |
| <b>Resistance type</b>                                                    |   |     |     |        |        |                         |              |             |              |                         |              |             |              |
| KPC-producing Enterobacteriaceae                                          | 2 | 79  | 107 | 37.50% | 15.50% | 2.69(1.61, 4.51)        | 0.000        | 0.0         |              | 0.23(0.06, 0.41)        | 0.010        | 43.8        |              |
| OXA-producing Enterobacteriaceae                                          | 1 | 27  | 108 | 11.10% | 7.40%  | 1.50(0.43, 5.28)        | 0.528        | NA          |              | 0.04(-0.09, 0.17)       | 0.572        | NA          |              |
| include non-carbapenemas e-producing strains or multiple resistance types |   |     |     |        |        |                         |              |             | <b>0.488</b> |                         |              |             | <b>0.277</b> |
|                                                                           | 5 | 285 | 563 | 52.06% | 20.24% | 2.96(1.87, 4.70)        | 0.000        | 75.4        |              | 0.33(0.20, 0.46)        | 0.000        | 76.9        |              |
| <b>Sample size</b>                                                        |   |     |     |        |        |                         |              |             |              |                         |              |             |              |
| <100                                                                      | 1 | 37  | 22  | 27.00% | 14.00% | 1.98(0.61, 6.43)        | 0.255        | NA          |              | 0.13(-0.07, 0.34)       | 0.195        | NA          |              |
| 100-200                                                                   | 6 | 301 | 554 | 39.07% | 13.77% | 3.21(2.35, 4.39)        | 0.000        | 22.0        | <b>0.641</b> | 0.26(0.13, 0.39)        | 0.000        | 80.0        | <b>0.566</b> |
| >200                                                                      | 1 | 53  | 202 | 85.00% | 43.00% | 1.97(1.62, 2.40)        | 0.000        | NA          |              | 0.42(0.30, 0.54)        | 0.000        | NA          |              |
| <b>Range of publication year</b>                                          |   |     |     |        |        |                         |              |             |              |                         |              |             |              |
| 2008-2010                                                                 | 2 | 136 | 121 | 32.50% | 13.00% | 3.07(1.79, 5.28)        | 0.000        | 0.0         |              | 0.23(0.10, 0.36)        | 0.000        | 27.2        |              |
| 2011-2013                                                                 | 1 | 42  | 85  | 48.00% | 17.00% | 2.89(1.63, 5.13)        | 0.000        | NA          |              | 0.31(0.14, 0.48)        | 0.000        | NA          |              |
| 2014-2016                                                                 | 3 | 113 | 391 | 46.17% | 25.00% | 2.00(1.66, 2.40)        | 0.000        | 0.0         | <b>0.380</b> | 0.24(-0.02, 0.49)       | 0.067        | 89.5        | <b>0.849</b> |
| 2017-2020                                                                 | 2 | 100 | 181 | 47.45% | 10.80% | 4.14(1.94, 8.82)        | 0.000        | 58.4        |              | 0.36(-0.05, 0.77)       | 0.082        | 92.5        |              |
| <b>Total</b>                                                              |   | 391 | 778 | 43.30% | 17.45% | <b>2.74(1.97, 3.81)</b> | <b>0.000</b> | <b>58.3</b> |              | <b>0.27(0.15, 0.38)</b> | <b>0.000</b> | <b>79.5</b> |              |

OXA,oxacillinase;KPC, Klebsiella pneumoniae carbapenemase

Table S5 Univariate meta-regression of the potential variables on risk difference of in-hospital mortality for patients with CRE versus CSE

| Variables                 | Sub-categories                                                           | No. of studies | No. of CRE patients | No. of CSE patients | coefficient | standard error | 95% confidence interval |         | P value from meta-regression |
|---------------------------|--------------------------------------------------------------------------|----------------|---------------------|---------------------|-------------|----------------|-------------------------|---------|------------------------------|
| Pathogens                 | Klebsiella pneumoniae                                                    | 24             | 1340                | 3072                | -0.199      | 0.187          | -0.583                  | 0.184   | 0.296                        |
|                           | Mixed Enterobacteriaceae pathogens                                       | 5              | 262                 | 551                 | -0.178      | 0.210          | -0.608                  | 0.252   | 0.404                        |
|                           | Escherichia. coli                                                        | 2              | 66                  | 130                 | reference   | -              | -                       | -       | -                            |
| Geographical region       | America                                                                  | 11             | 414                 | 840                 | -0.025      | 0.105          | -0.241                  | 0.190   | 0.810                        |
|                           | Europe                                                                   | 3              | 93                  | 74                  | -0.067      | 0.216          | -0.510                  | 0.375   | 0.757                        |
|                           | Asia                                                                     | 16             | 1038                | 2665                |             |                |                         |         |                              |
| Economic status           | High income                                                              | 17             | 732                 | 1110                | -0.068      | 0.097          | -0.267                  | 0.131   | 0.490                        |
|                           | Upper middle income                                                      | 13             | 813                 | 2469                | reference   | -              | -                       | -       | -                            |
| Infection type            | Bloodstream infections                                                   | 12             | 556                 | 1278                | 0.228       | 0.195          | -0.171                  | 0.627   | 0.252                        |
|                           | Urinary tract infection                                                  | 3              | 177                 | 271                 | reference   | -              | -                       | -       | -                            |
|                           | pneumonia                                                                | 1              | 74                  | 74                  | 0.084       | 0.335          | -0.604                  | 0.771   | 0.805                        |
|                           | Mixed                                                                    | 15             | 861                 | 2130                | 0.150       | 0.203          | -0.267                  | 0.567   | 0.468                        |
| Resistance type           | KPC-producing Enterobacteriaceae                                         | 6              | 264                 | 478                 | 0.062       | 0.995          | -1.977                  | 2.100   | 0.951                        |
|                           | OXA-producing Enterobacteriaceae                                         | 1              | 20                  | 9                   | reference   | -              | -                       | -       | -                            |
|                           | include non-carbapenemase-producing strains or multiple resistance types | 24             | 1384                | 3266                | -0.007      | 0.992          | -2.040                  | 2.025   | 0.994                        |
| Sample size               | <100                                                                     | 14             | 387                 | 588                 | 0.006       | 0.128          | -0.255                  | 0.268   | 0.962                        |
|                           | 100-200                                                                  | 11             | 589                 | 959                 | reference   | -              | -                       | -       | -                            |
|                           | >200                                                                     | 6              | 692                 | 2206                | -0.029      | 0.109          | -0.253                  | 0.194   | 0.789                        |
| Range of publication year | 2008-2010                                                                | 3              | 184                 | 177                 | 0.042       | 0.183          | -0.335                  | 0.418   | 0.823                        |
|                           | 2011-2013                                                                | 6              | 275                 | 379                 | 0.031       | 0.131          | -0.238                  | 0.299   | 0.816                        |
|                           | 2014-2016                                                                | 14             | 482                 | 1022                | -0.005      | 0.117          | -0.245                  | 0.234   | 0.964                        |
|                           | 2017-2020                                                                | 8              | 727                 | 2175                | reference   | -              | -                       | -       | -                            |
| Sample size               | -                                                                        | 31             | 1668                | 3753                | -0.00012    | 0.00013        | -0.00039                | 0.00015 | 0.380                        |
| Year of publication       | -                                                                        | 31             | 1668                | 3753                | -0.005      | 0.015          | -0.035                  | 0.025   | 0.751                        |

OXA,oxacillinase;KPC, Klebsiella pneumoniae carbapenemase

Table S6 Univariate meta-regression of the potential variables on risk difference of 28d or 30d mortality for patients with CRE versus CSE

| Variables                 | Sub-groups                                                       | No. of studies | No. of CRE patients | No. of CSE patients | coefficient | standard error | 95% confidence interval |         | P value from meta-regression |
|---------------------------|------------------------------------------------------------------|----------------|---------------------|---------------------|-------------|----------------|-------------------------|---------|------------------------------|
| Pathogens                 | Klebsiella pneumoniae                                            | 14             | 1076                | 2248                | reference   | -              | -                       | -       | -                            |
|                           | Mixed Enterobacteriaceae pathogens                               | 2              | 68                  | 181                 | -0.228      | 0.385          | -1.055                  | 0.598   | 0.563                        |
|                           | Escherichia. coli                                                | 1              | 17                  | 34                  | -0.047      | 0.247          | -0.576                  | 0.483   | 0.853                        |
| Geographical region       | America                                                          | 3              | 99                  | 484                 | -0.129      | 0.204          | -0.566                  | 0.307   | 0.536                        |
|                           | Europe                                                           | 2              | 398                 | 211                 | -0.116      | 0.154          | -0.447                  | 0.215   | 0.464                        |
|                           | Asia                                                             | 12             | 664                 | 1768                | reference   | -              | -                       | -       | -                            |
| Economic status           | High income                                                      | 7              | 657                 | 962                 | -0.066      | 0.110          | -0.301                  | 0.169   | 0.558                        |
|                           | Upper middle income                                              | 10             | 504                 | 1501                | reference   | -              | -                       | -       | -                            |
| Infection type            | Bloodstream infections                                           | 12             | 929                 | 1812                | reference   | -              | -                       | -       | -                            |
|                           | Mixed                                                            | 5              | 232                 | 651                 | -0.095      | 0.165          | -0.446                  | 0.257   | 0.575                        |
| Resistance type           | KPC-producing Enterobacteriaceae include                         | 2              | 115                 | 421                 | -0.150      | 0.210          | -0.599                  | 0.298   | 0.486                        |
|                           | non-carbapenemase-producing strains or multiple resistance types | 15             | 1046                | 2042                | reference   | -              | -                       | -       | -                            |
| Sample size               | <100                                                             | 6              | 167                 | 290                 | -0.030      | 0.141          | -0.332                  | 0.272   | 0.833                        |
|                           | 100-200                                                          | 4              | 184                 | 441                 | -0.179      | 0.236          | -0.686                  | 0.327   | 0.460                        |
|                           | >200                                                             | 7              | 810                 | 1732                | reference   | -              | -                       | -       | -                            |
| Range of publication year | 2011-2013                                                        | 4              | 164                 | 329                 | -0.168      | 0.134          | -0.455                  | 0.119   | 0.229                        |
|                           | 2014-2016                                                        | 4              | 468                 | 349                 | -0.182      | 0.144          | -0.491                  | 0.128   | 0.228                        |
|                           | 2017-2020                                                        | 9              | 529                 | 1785                | reference   | -              | -                       | -       | -                            |
| Sample size               | -                                                                | 17             | 1161                | 2463                | 0.00009     | 0.00039        | -0.00075                | 0.00092 | 0.827                        |
| Year of publication       | -                                                                | 17             | 1161                | 2463                | 0.027       | 0.020          | -0.017                  | 0.070   | 0.207                        |

KPC, Klebsiella pneumoniae carbapenemase



Table S7 Univariate meta-regression of the potential variables on risk ratio of in-hospital mortality for patients with CRE versus CSE

| Variables                 | Sub-categories                                                           | No. of studies | No. of CRE patients | No. of CSE patients | coefficient | standard error | 95% confidence interval |         | P value from meta-regression |
|---------------------------|--------------------------------------------------------------------------|----------------|---------------------|---------------------|-------------|----------------|-------------------------|---------|------------------------------|
| Pathogens                 | Klebsiella pneumoniae                                                    | 24             | 1340                | 3072                | -0.040      | 0.344          | -0.744                  | 0.664   | 0.908                        |
|                           | Mixed Enterobacteriaceae pathogens                                       | 5              | 262                 | 551                 | -0.080      | 0.387          | -0.872                  | 0.713   | 0.838                        |
|                           | Escherichia. coli                                                        | 2              | 66                  | 130                 | reference   | -              | -                       | -       | -                            |
| Geographical region       | America                                                                  | 11             | 414                 | 840                 | -0.108      | 0.173          | -0.463                  | 0.247   | 0.537                        |
|                           | Europe                                                                   | 3              | 93                  | 74                  | -0.334      | 0.306          | -0.962                  | 0.293   | 0.284                        |
|                           | Asia                                                                     | 16             | 1038                | 2665                |             |                |                         |         |                              |
| Economic status           | High income                                                              | 17             | 732                 | 1110                | -0.165      | 0.156          | -0.485                  | 0.154   | 0.299                        |
|                           | Upper middle income                                                      | 13             | 813                 | 2469                | reference   | -              | -                       | -       | -                            |
| Infection type            | Bloodstream infections                                                   | 12             | 556                 | 1278                | 0.194       | 0.308          | -0.437                  | 0.825   | 0.533                        |
|                           | Urinary tract infection                                                  | 3              | 177                 | 271                 | reference   | -              | -                       | -       | -                            |
|                           | pneumonia                                                                | 1              | 74                  | 74                  | 0.044       | 0.495          | -0.972                  | 1.061   | 0.929                        |
|                           | Mixed                                                                    | 15             | 861                 | 2130                | 0.339       | 0.315          | -0.307                  | 0.985   | 0.291                        |
| Resistance type           | KPC-producing Enterobacteriaceae                                         | 6              | 264                 | 478                 | -0.394      | 1.108          | -2.664                  | 1.875   | 0.725                        |
|                           | OXA-producing Enterobacteriaceae                                         | 1              | 20                  | 9                   | reference   | -              | -                       | -       | -                            |
|                           | include non-carbapenemase-producing strains or multiple resistance types | 24             | 1384                | 3266                | -0.419      | 1.100          | -2.672                  | 1.835   | 0.707                        |
| Sample size               | <100                                                                     | 14             | 387                 | 588                 | -0.142      | 0.189          | -0.529                  | 0.246   | 0.460                        |
|                           | 100-200                                                                  | 11             | 589                 | 959                 | reference   | -              | -                       | -       | -                            |
|                           | >200                                                                     | 6              | 692                 | 2206                | -0.119      | 0.187          | -0.502                  | 0.265   | 0.532                        |
| Range of publication year | 2008-2010                                                                | 3              | 184                 | 177                 | -0.157      | 0.254          | -0.677                  | 0.364   | 0.541                        |
|                           | 2011-2013                                                                | 6              | 275                 | 379                 | -0.447      | 0.192          | -0.840                  | -0.054  | 0.027                        |
|                           | 2014-2016                                                                | 14             | 482                 | 1022                | -0.343      | 0.175          | -0.702                  | 0.017   | 0.061                        |
|                           | 2017-2020                                                                | 8              | 727                 | 2175                | reference   | -              | -                       | -       | -                            |
| Sample size               | -                                                                        | 31             | 1668                | 3753                | 0.00016     | 0.00023        | -0.00031                | 0.00062 | 0.503                        |
| Year of publication       | -                                                                        | 31             | 1668                | 3753                | 0.023       | 0.023          | -0.024                  | 0.070   | 0.316                        |

OXA,oxacillinase;KPC, Klebsiella pneumoniae carbapenemase

Table S8 Univariate meta-regression of the potential variables on risk ratio of 28-30d mortality for patients with CRE versus CSE

| Variables                        | Sub-groups                                                                                                | No. of studies | No. of CRE patients | No. of CSE patients | coefficient | standard error | 95% confidence interval | P value from meta-regression |       |
|----------------------------------|-----------------------------------------------------------------------------------------------------------|----------------|---------------------|---------------------|-------------|----------------|-------------------------|------------------------------|-------|
|                                  | Klebsiella pneumoniae                                                                                     | 14             | 1076                | 2248                | reference   | -              | -                       | -                            |       |
| <b>Pathogens</b>                 | Mixed Enterobacteriaceae pathogens                                                                        | 2              | 68                  | 181                 | -0.370      | 0.464          | -1.364                  | 0.625                        | 0.439 |
|                                  | Escherichia. coli                                                                                         | 1              | 17                  | 34                  | -0.443      | 0.388          | -1.275                  | 0.389                        | 0.272 |
| <b>Geographical region</b>       | America                                                                                                   | 3              | 99                  | 484                 | -0.125      | 0.313          | -0.796                  | 0.545                        | 0.695 |
|                                  | Europe                                                                                                    | 2              | 398                 | 211                 | -0.146      | 0.299          | -0.787                  | 0.495                        | 0.633 |
|                                  | Asia                                                                                                      | 12             | 664                 | 1768                | reference   | -              | -                       | -                            | -     |
| <b>Economic status</b>           | High income                                                                                               | 7              | 657                 | 962                 | -0.262      | 0.189          | -0.664                  | 0.141                        | 0.186 |
|                                  | Upper middle income                                                                                       | 10             | 504                 | 1501                | reference   | -              | -                       | -                            | -     |
| <b>Infection type</b>            | Bloodstream infections                                                                                    | 12             | 929                 | 1812                | reference   | -              | -                       | -                            | -     |
|                                  | Mixed                                                                                                     | 5              | 232                 | 651                 | -0.117      | 0.244          | -0.636                  | 0.402                        | 0.637 |
| <b>Resistance type</b>           | KPC-producing Enterobacteriaceae include non-carbapenemase-producing strains or multiple resistance types | 2              | 115                 | 421                 | -0.209      | 0.316          | -0.882                  | 0.465                        | 0.519 |
|                                  |                                                                                                           | 15             | 1046                | 2042                | reference   | -              | -                       | -                            | -     |
| <b>Sample size</b>               | <100                                                                                                      | 6              | 167                 | 290                 | -0.191      | 0.224          | -0.672                  | 0.290                        | 0.408 |
|                                  | 100-200                                                                                                   | 4              | 184                 | 441                 | -0.064      | 0.322          | -0.754                  | 0.625                        | 0.845 |
|                                  | >200                                                                                                      | 7              | 810                 | 1732                | reference   | -              | -                       | -                            | -     |
| <b>Range of publication year</b> | 2011-2013                                                                                                 | 4              | 164                 | 329                 | -0.621      | 0.149          | -0.939                  | -0.302                       | 0.001 |
|                                  | 2014-2016                                                                                                 | 4              | 468                 | 349                 | -0.514      | 0.160          | -0.856                  | -0.171                       | 0.006 |
|                                  | 2017-2020                                                                                                 | 9              | 529                 | 1785                | reference   | -              | -                       | -                            | -     |
| <b>Sample size</b>               | -                                                                                                         | 17             | 1161                | 2463                | 0.00039     | 0.00067        | -0.00104                | 0.00182                      | 0.572 |
| <b>Year of publication</b>       | -                                                                                                         | 17             | 1161                | 2463                | 0.093       | 0.025          | 0.038                   | 0.147                        | 0.002 |

KPC, Klebsiella pneumoniae carbapenemase

## PRISMA Checklist

| Section/topic             | # | Checklist item                                                                                                                                                                                                                                                                                              | Reported on page # |
|---------------------------|---|-------------------------------------------------------------------------------------------------------------------------------------------------------------------------------------------------------------------------------------------------------------------------------------------------------------|--------------------|
| <b>TITLE</b>              |   |                                                                                                                                                                                                                                                                                                             |                    |
| Title                     | 1 | Identify the report as a systematic review, meta-analysis, or both.                                                                                                                                                                                                                                         | Title page         |
| <b>ABSTRACT</b>           |   |                                                                                                                                                                                                                                                                                                             |                    |
| Structured summary        | 2 | Provide a structured summary including, as applicable: background; objectives; data sources; study eligibility criteria, participants, and interventions; study appraisal and synthesis methods; results; limitations; conclusions and implications of key findings; systematic review registration number. | 2                  |
| <b>INTRODUCTION</b>       |   |                                                                                                                                                                                                                                                                                                             |                    |
| Rationale                 | 3 | Describe the rationale for the review in the context of what is already known.                                                                                                                                                                                                                              | 4-5                |
| Objectives                | 4 | Provide an explicit statement of questions being addressed with reference to participants, interventions, comparisons, outcomes, and study design (PICOS).                                                                                                                                                  | 5                  |
| <b>METHODS</b>            |   |                                                                                                                                                                                                                                                                                                             |                    |
| Protocol and registration | 5 | Indicate if a review protocol exists, if and where it can be accessed (e.g., Web address), and, if available, provide registration information including registration number.                                                                                                                               | 6                  |
| Eligibility criteria      | 6 | Specify study characteristics (e.g., PICOS, length of follow-up) and report characteristics (e.g., years considered, language, publication status) used as criteria for eligibility, giving rationale.                                                                                                      | 7                  |
| Information sources       | 7 | Describe all information sources (e.g., databases with dates of coverage, contact with study authors to identify additional studies) in the search and date last searched.                                                                                                                                  | 6                  |
| Search                    | 8 | Present full electronic search strategy for at least one database, including any limits used, such that it could be repeated.                                                                                                                                                                               | 6                  |

|                                    |    |                                                                                                                                                                                                                        |                                                            |
|------------------------------------|----|------------------------------------------------------------------------------------------------------------------------------------------------------------------------------------------------------------------------|------------------------------------------------------------|
| Study selection                    | 9  | State the process for selecting studies (i.e., screening, eligibility, included in systematic review, and, if applicable, included in the meta-analysis).                                                              | 7                                                          |
| Data collection process            | 10 | Describe method of data extraction from reports (e.g., piloted forms, independently, in duplicate) and any processes for obtaining and confirming data from investigators.                                             | 7-8                                                        |
| Data items                         | 11 | List and define all variables for which data were sought (e.g., PICOS, funding sources) and any assumptions and simplifications made.                                                                                  | 7-8                                                        |
| Risk of bias in individual studies | 12 | Describe methods used for assessing risk of bias of individual studies (including specification of whether this was done at the study or outcome level), and how this information is to be used in any data synthesis. | 10                                                         |
| Summary measures                   | 13 | State the principal summary measures (e.g., risk ratio, difference in means).                                                                                                                                          | 8-9                                                        |
| Synthesis of results               | 14 | Describe the methods of handling data and combining results of studies, if done, including measures of consistency (e.g., $I^2$ ) for each meta-analysis.                                                              | 8-9                                                        |
| Risk of bias across studies        | 15 | Specify any assessment of risk of bias that may affect the cumulative evidence (e.g., publication bias, selective reporting within studies).                                                                           | 10                                                         |
| Additional analyses                | 16 | Describe methods of additional analyses (e.g., sensitivity or subgroup analyses, meta-regression), if done, indicating which were pre-specified.                                                                       | 9                                                          |
| <b>RESULTS</b>                     |    |                                                                                                                                                                                                                        |                                                            |
| Study selection                    | 17 | Give numbers of studies screened, assessed for eligibility, and included in the review, with reasons for exclusions at each stage, ideally with a flow diagram.                                                        | 10, Figure 1                                               |
| Study characteristics              | 18 | For each study, present characteristics for which data were extracted (e.g., study size, PICOS, follow-up period) and provide the citations.                                                                           | 10, Table 1, Table S1 in Supplementary Material Appendix 3 |

|                               |    |                                                                                                                                                                                                          |                                       |
|-------------------------------|----|----------------------------------------------------------------------------------------------------------------------------------------------------------------------------------------------------------|---------------------------------------|
| Risk of bias within studies   | 19 | Present data on risk of bias of each study and, if available, any outcome level assessment (see item 12).                                                                                                | 11, Supplementary Material Appendix 4 |
| Results of individual studies | 20 | For all outcomes considered (benefits or harms), present, for each study: (a) simple summary data for each intervention group (b) effect estimates and confidence intervals, ideally with a forest plot. | 14, Figure 2, Figure 3, Table 2       |
| Synthesis of results          | 21 | Present results of each meta-analysis done, including confidence intervals and measures of consistency.                                                                                                  | 14, Figure 2, Figure 3, Table 2       |
| Risk of bias across studies   | 22 | Present results of any assessment of risk of bias across studies (see Item 15).                                                                                                                          | 17, Figure 4                          |
| Additional analysis           | 23 | Give results of additional analyses, if done (e.g., sensitivity or subgroup analyses, meta-regression [see Item 16]).                                                                                    | 14-17                                 |
| <b>DISCUSSION</b>             |    |                                                                                                                                                                                                          |                                       |
| Summary of evidence           | 24 | Summarize the main findings including the strength of evidence for each main outcome; consider their relevance to key groups (e.g., healthcare providers, users, and policy makers).                     | 19-22                                 |
| Limitations                   | 25 | Discuss limitations at study and outcome level (e.g., risk of bias), and at review-level (e.g., incomplete retrieval of identified research, reporting bias).                                            | 22-23                                 |
| Conclusions                   | 26 | Provide a general interpretation of the results in the context of other evidence, and implications for future research.                                                                                  | 22-23                                 |
| <b>FUNDING</b>                |    |                                                                                                                                                                                                          |                                       |
| Funding                       | 27 | Describe sources of funding for the systematic review and other support (e.g., supply of data); role of funders for the systematic review.                                                               | 24                                    |
